# Supplementary material for: Evaluation of the Involvement of Heme Oxygenase-1 Expression in Discoid Lupus Erythematosus Lesions
Source: MDPI journal article supplement (doi:10.3390/antiox12071352), 2023-06-27
Supplement: s1 [file s1]

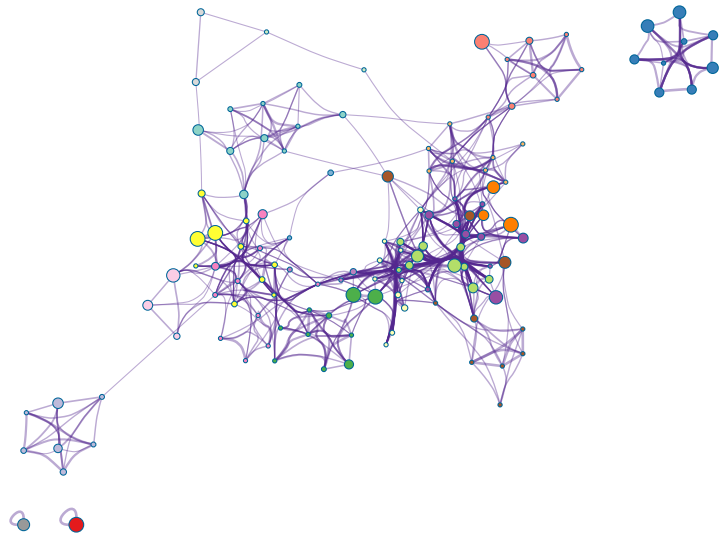

- Neutrophil degranulation
- Formation of the cornified envelope
- Signaling by Rho GTPases
- Cellular response to chemical stress
- Cellular responses to stress
- Membrane Trafficking
- Transcriptional Regulation by TP53
- Rab regulation of trafficking
- VEGFA-VEGFR2 signaling pathway
- regulation of autophagy
- PP2A A/C-striatin complex
- regulation of protein catabolic process
- Metabolism of lipids
- Intracellular trafficking proteins involved in CMT neuron
- FACT complex, UV-activated
- Cell Cycle
- intracellular protein transport
- Protein processing in endoplasmic reticulum
- PID PDGFRB PATHWAY
- Toposome


 created by  
<http://metascape.org>
