# Supplementary material for: Evaluation of the Involvement of Heme Oxygenase-1 Expression in Discoid Lupus Erythematosus Lesions
Source: MDPI journal article supplement (doi:10.3390/antiox12071352), 2023-06-27
Supplement: s1 [file s1]

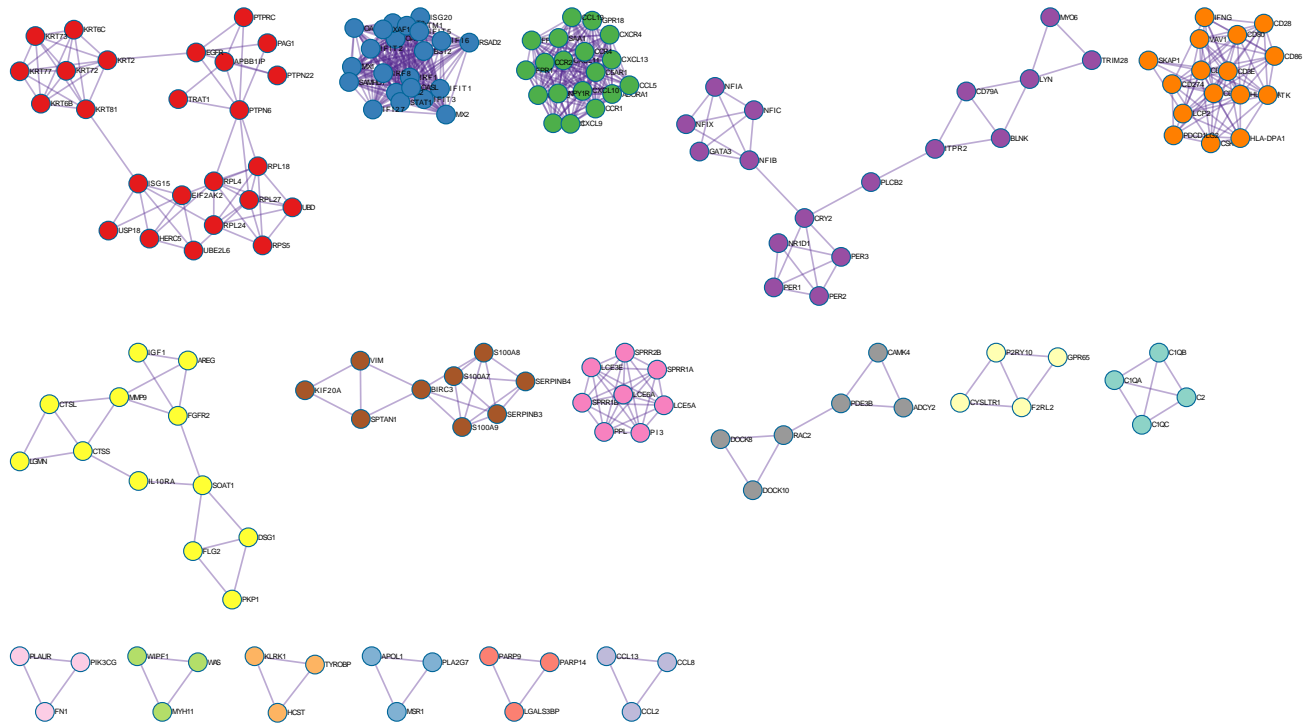

■ MCODE1  
■ MCODE2  
■ MCODE3  
■ MCODE4  
■ MCODE5  
■ MCODE6  
■ MCODE7  
■ MCODE8  
■ MCODE9  
■ MCODE10  
■ MCODE11  
■ MCODE12  
■ MCODE13  
■ MCODE14  
■ MCODE15  
■ MCODE16  
■ MCODE17

 created by  
<http://metascape.org>
