# Supplementary figures and images for: Evaluation of the Involvement of Heme Oxygenase-1 Expression in Discoid Lupus Erythematosus Lesions
Source: MDPI journal article supplement (doi:10.3390/antiox12071352), 2023-06-27

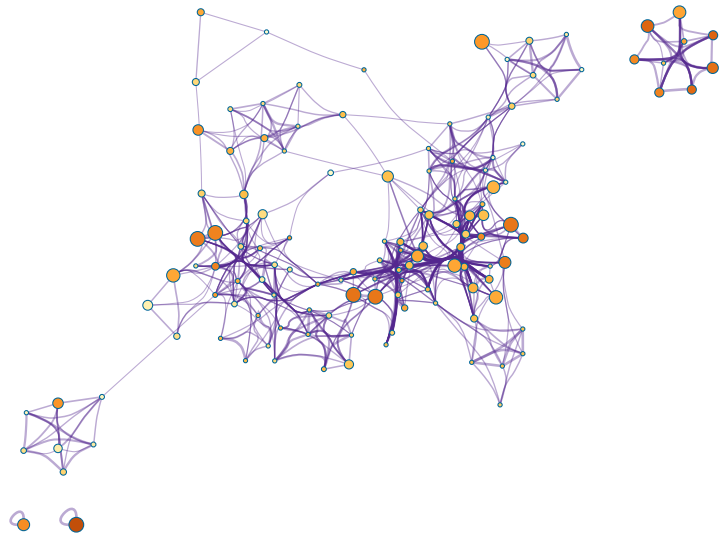

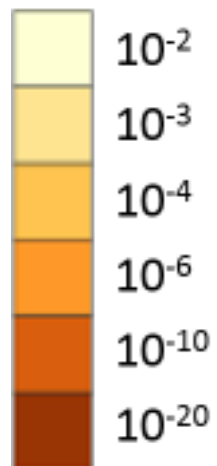

 created by  
<http://metascape.org>

Supplement: s1 [file s1]

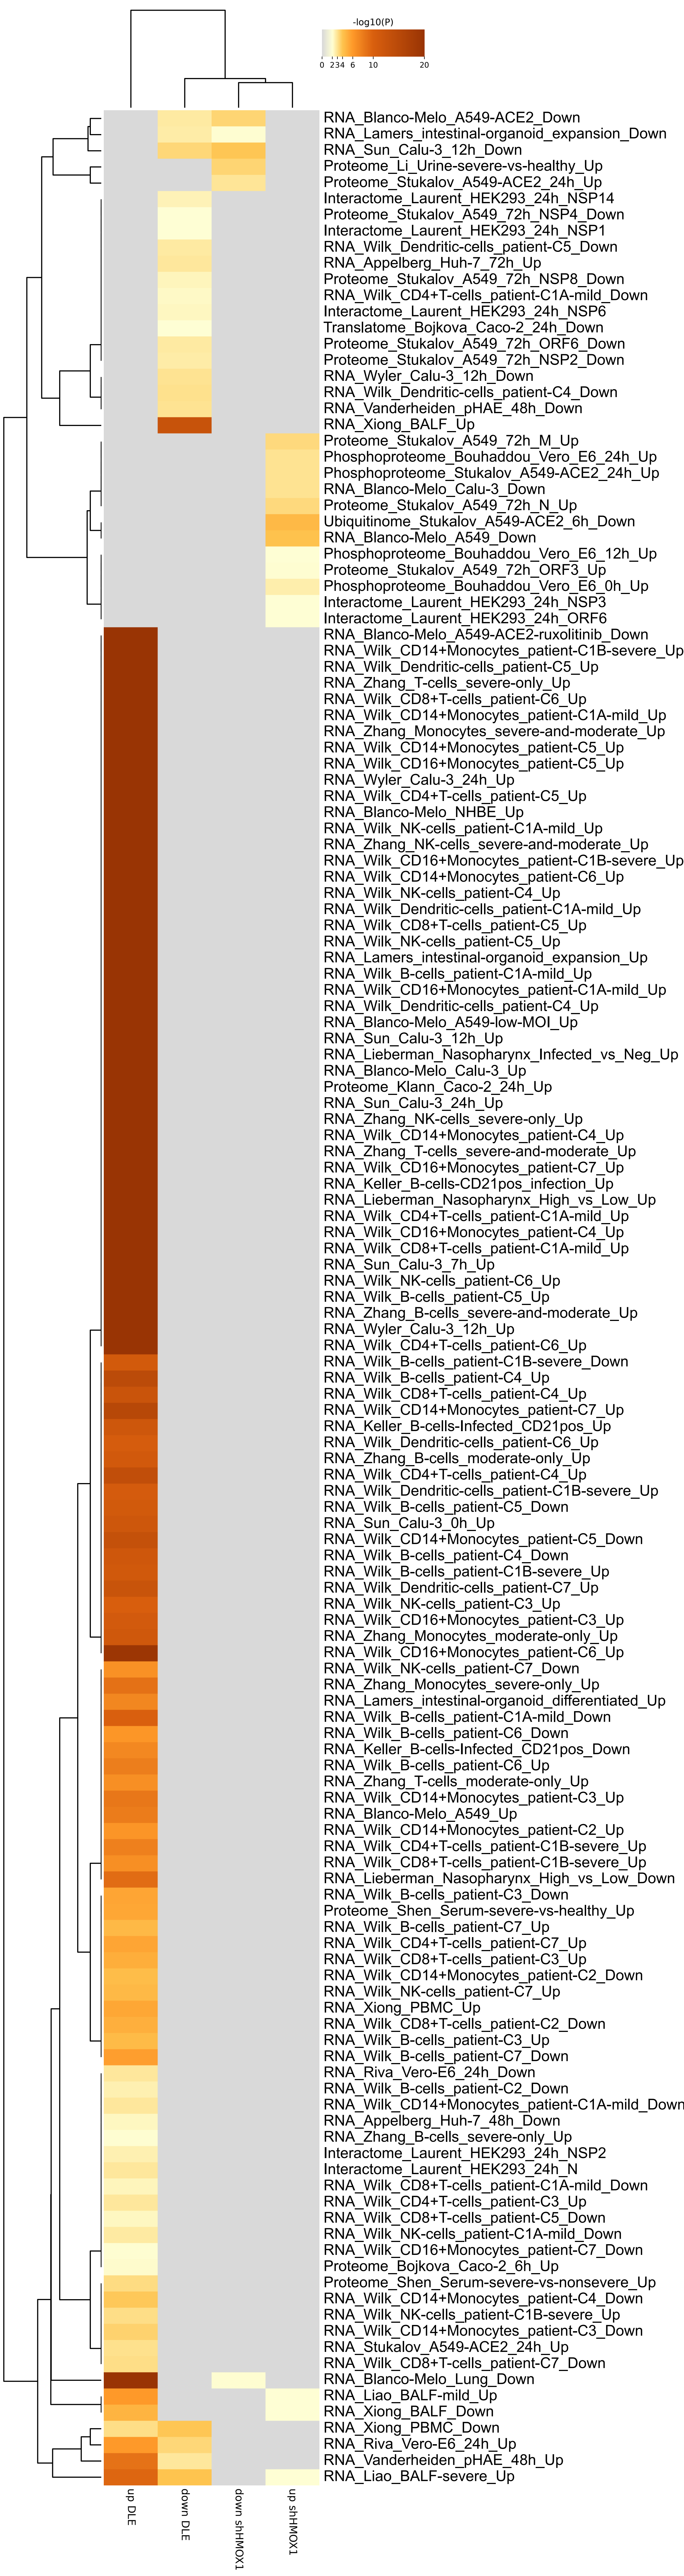

Supplement: s1 [file s1]

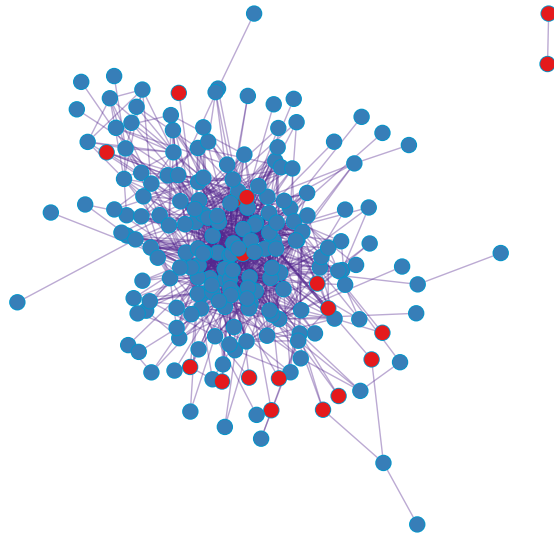

■ NEGATIVELY  
■ POSITIVELY  
 created by  
<http://metascape.org>

Supplement: s1 [file s1]

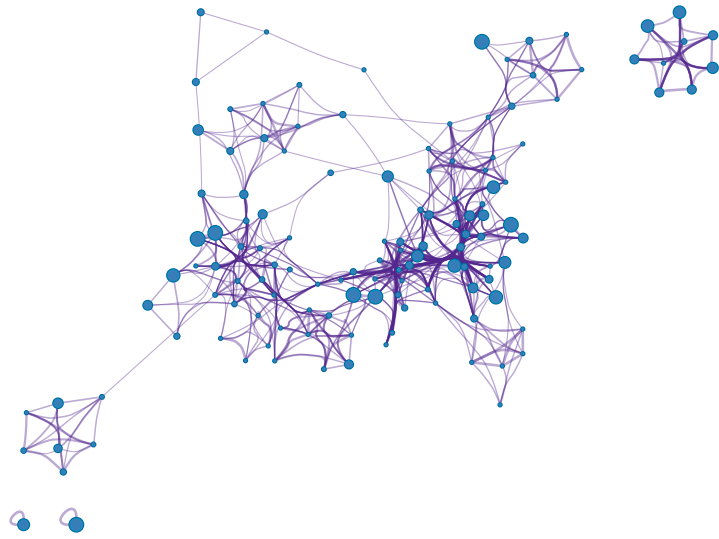

■ NEGATIVELY  
■ POSITIVELY  
 created by  
<http://metascape.org>

Supplement: s1 [file s1]

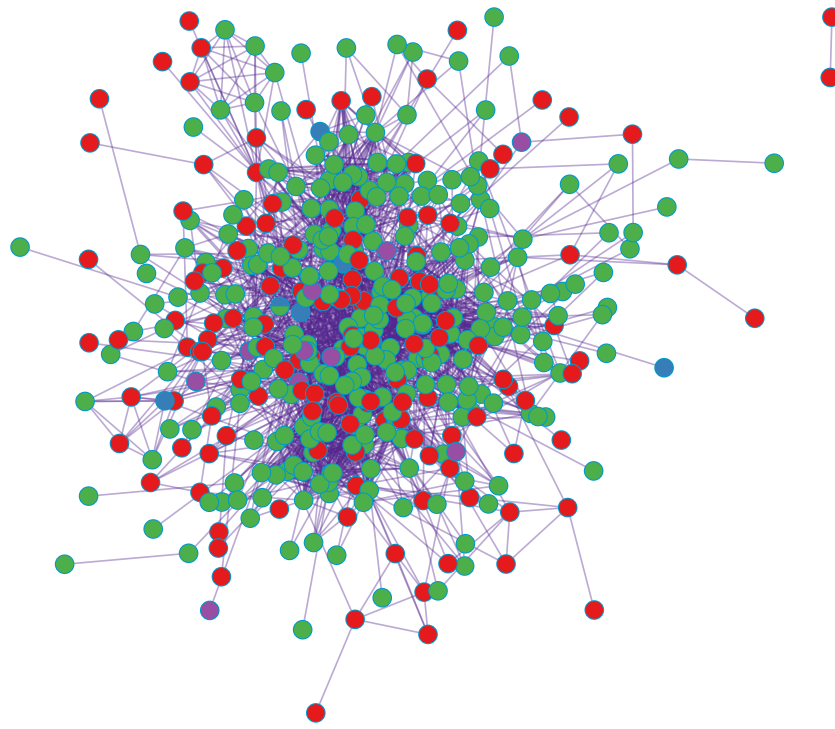

- down DLE
- down shHMOX1
- up DLE
- up shHMOX1

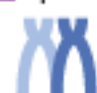

created by  
<http://metascope.org>

Supplement: s1 [file s1]

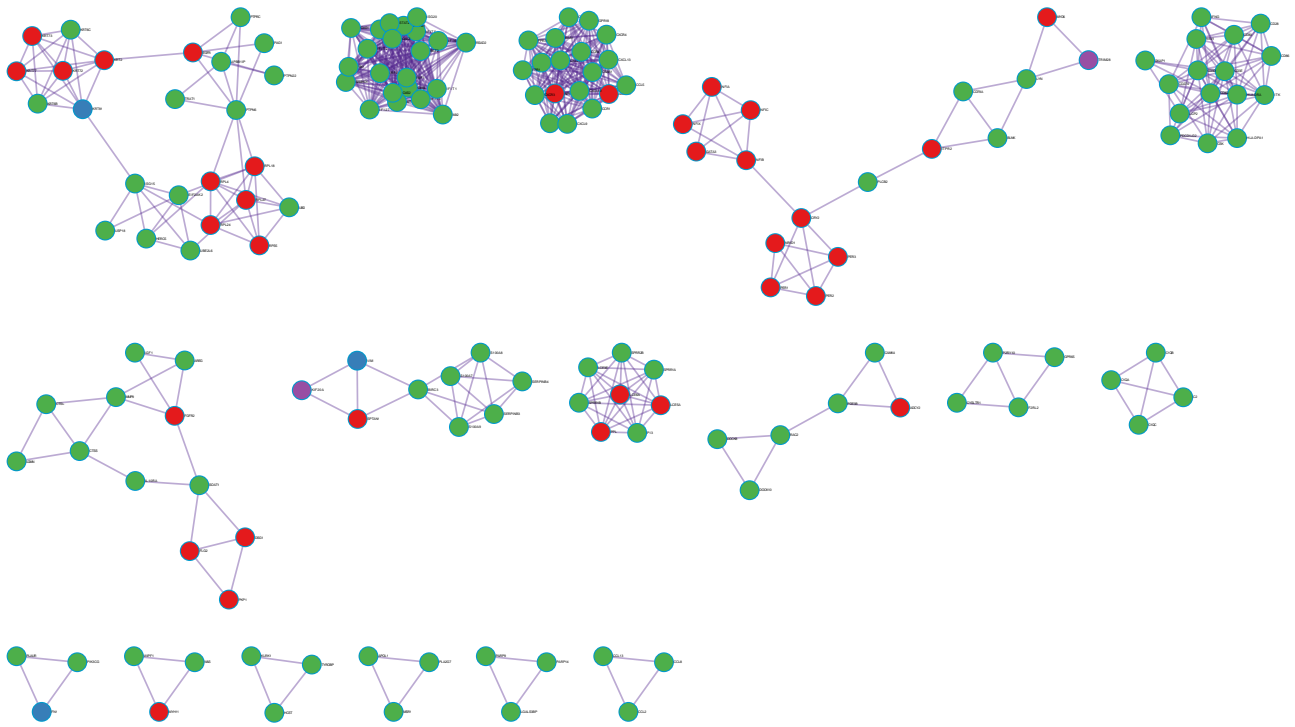

- down DLE
- down shHMOX1
- up DLE
- up shHMOX1



created by

<http://metascope.org>

Supplement: s1 [file s1]

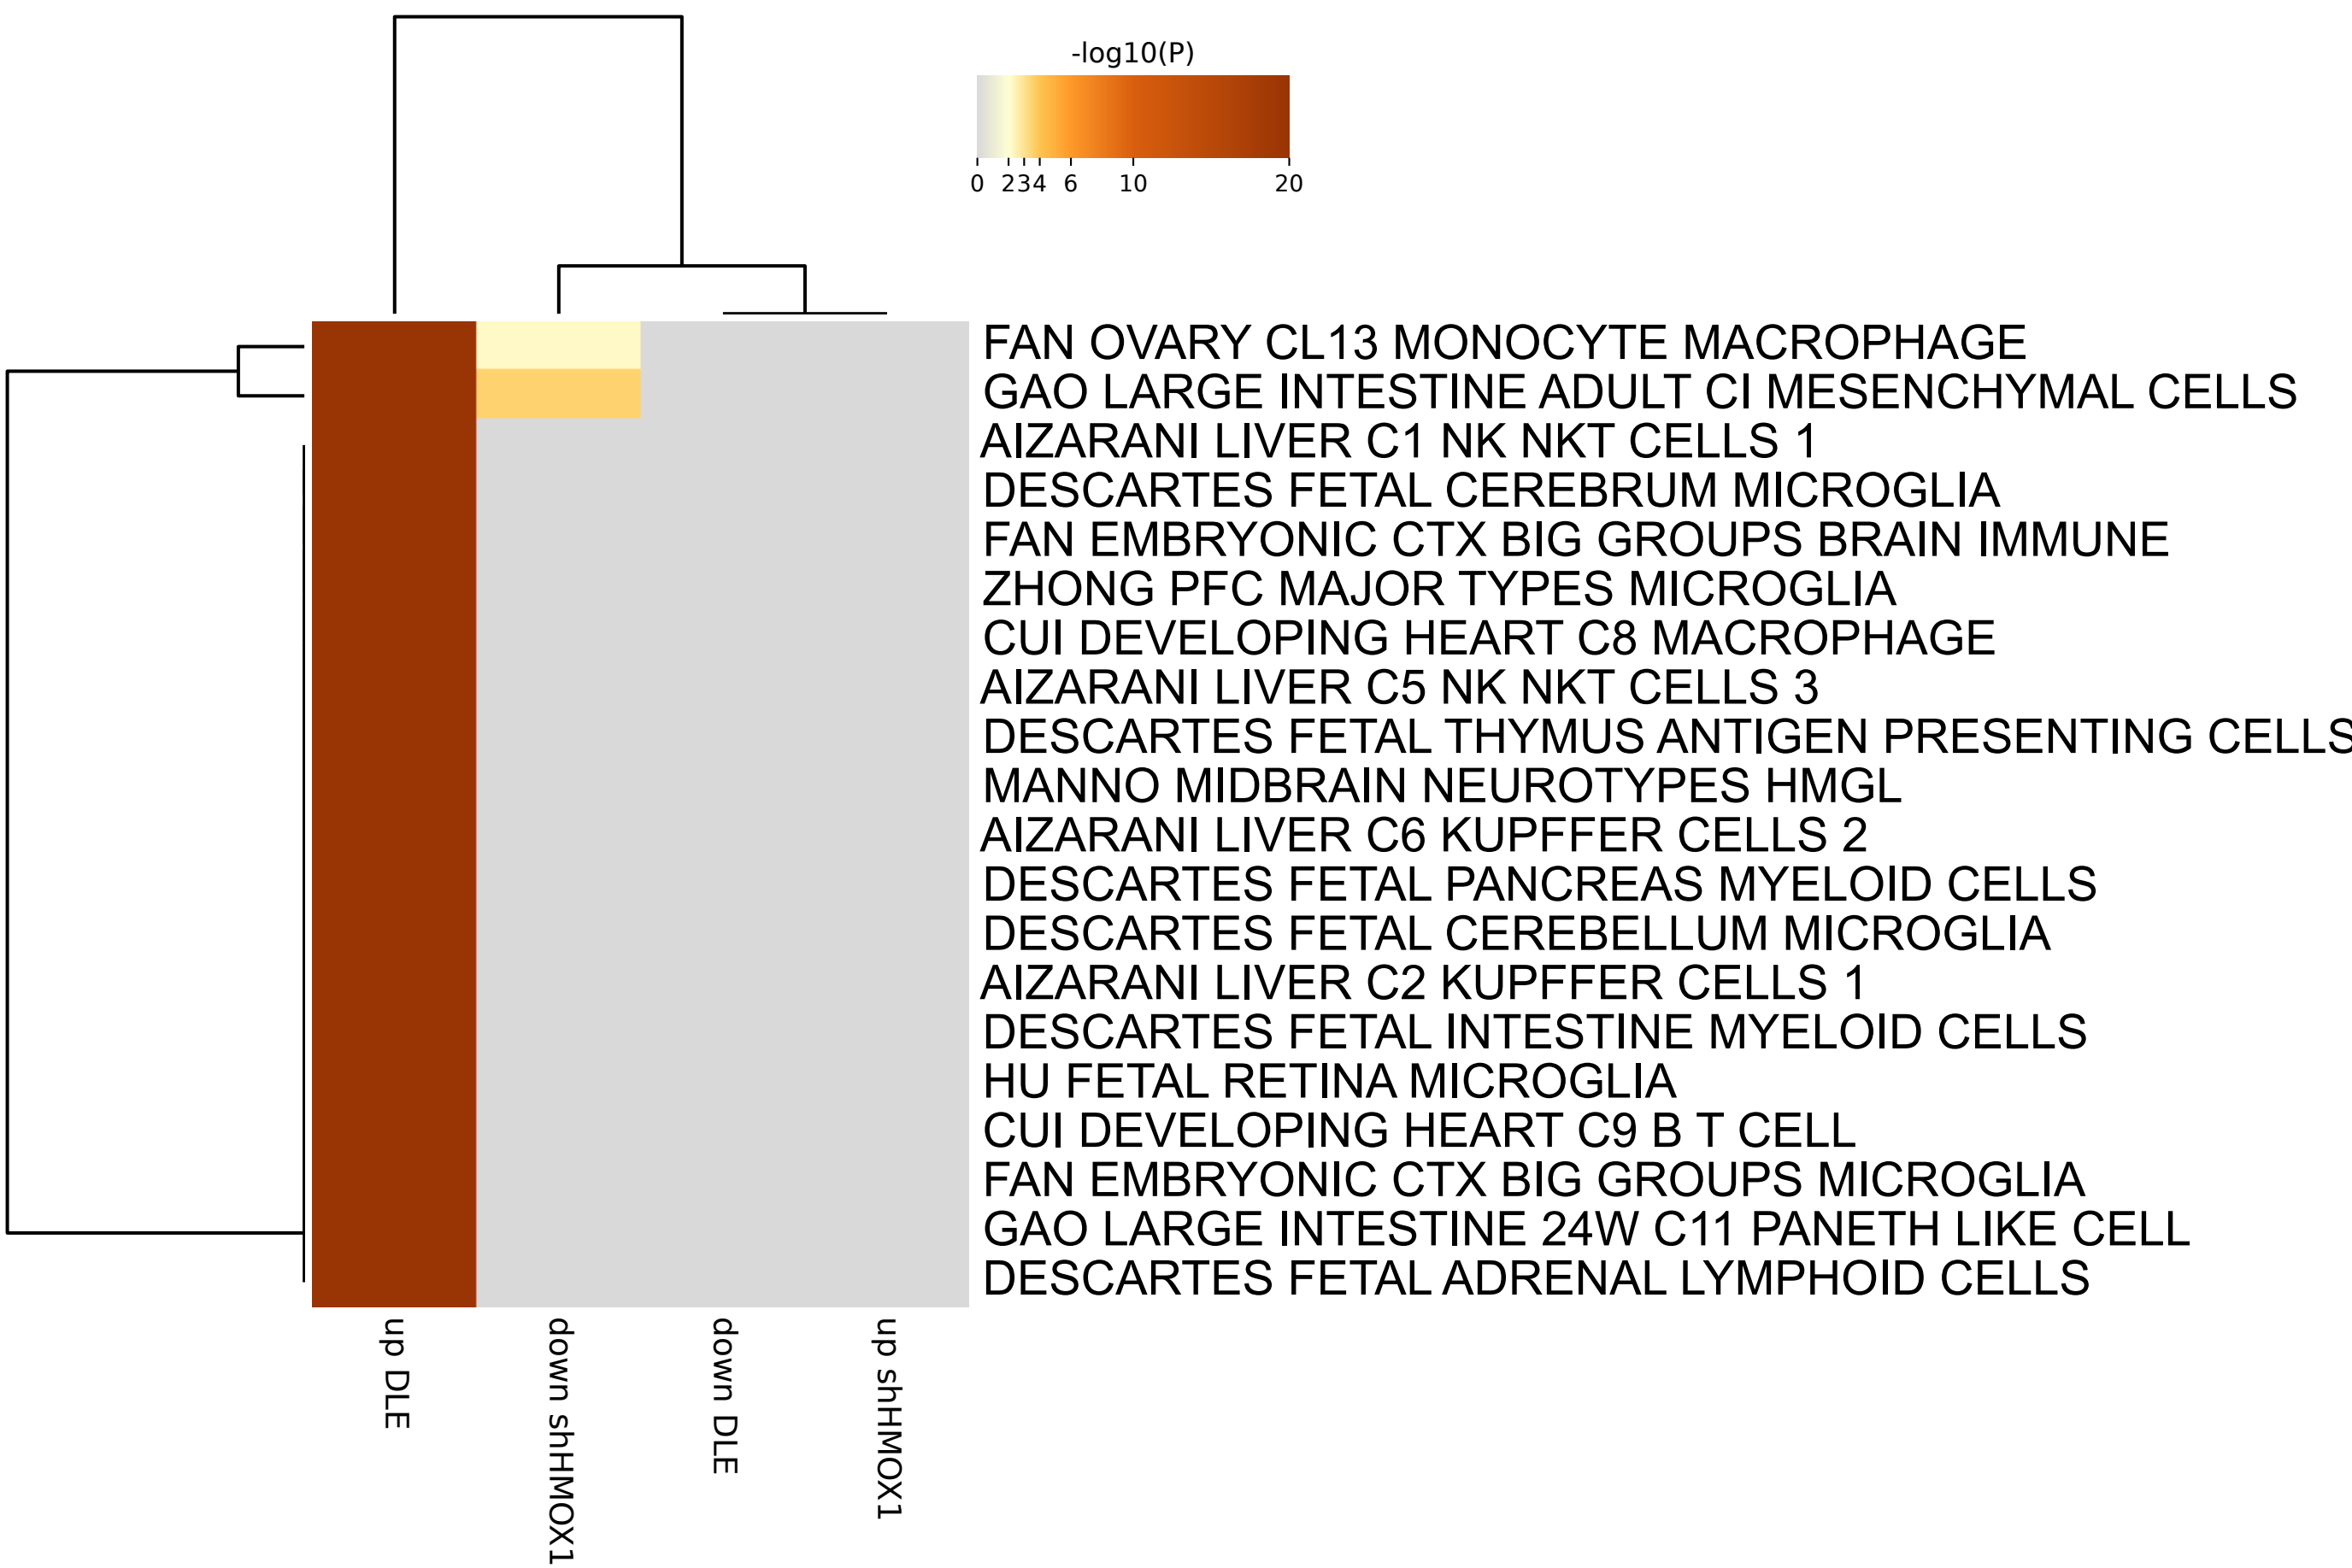

Supplement: s1 [file s1]

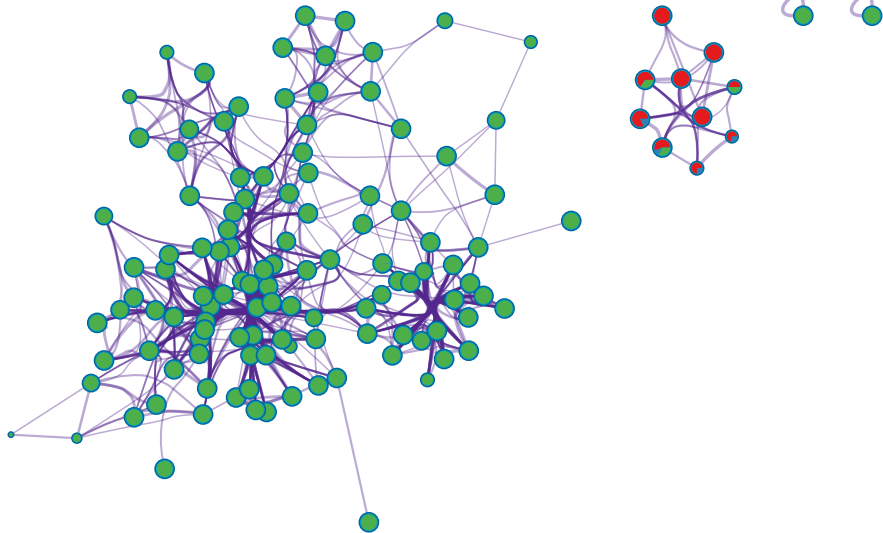

- down DLE
- down shHMOX1
- up DLE
- up shHMOX1



created by

<http://metascape.org>

Supplement: s1 [file s1]

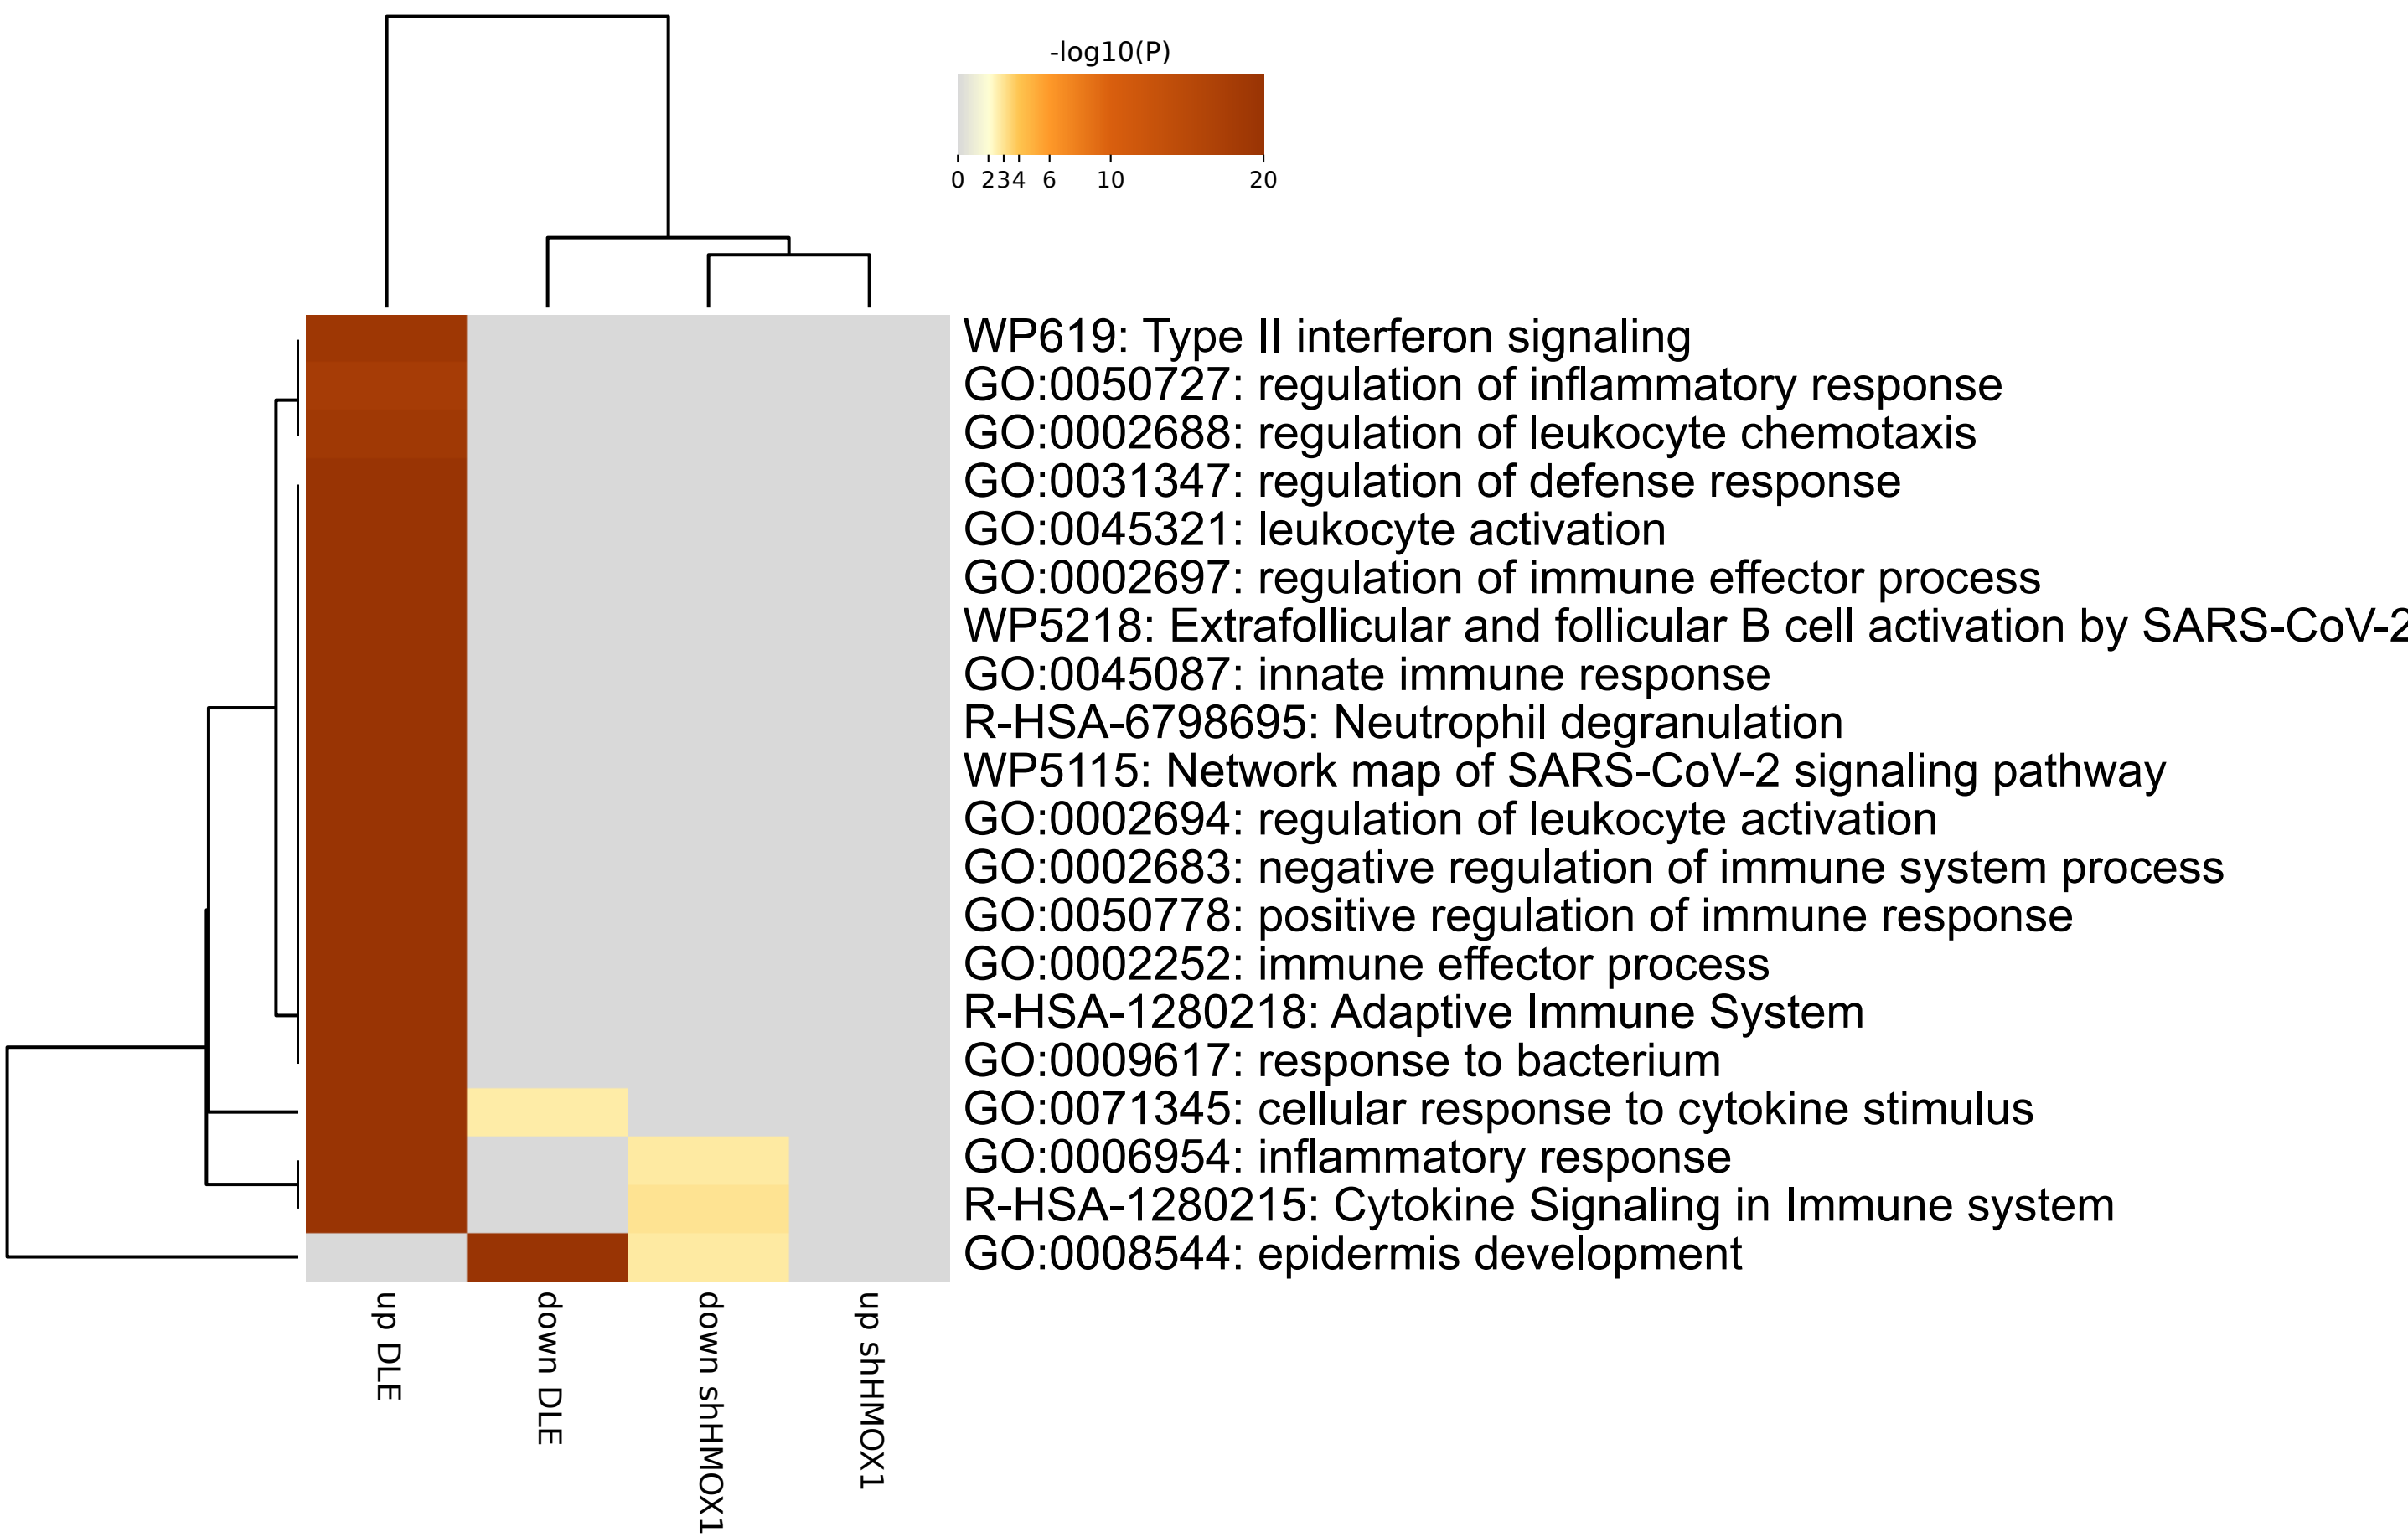

Supplement: s1 [file s1]

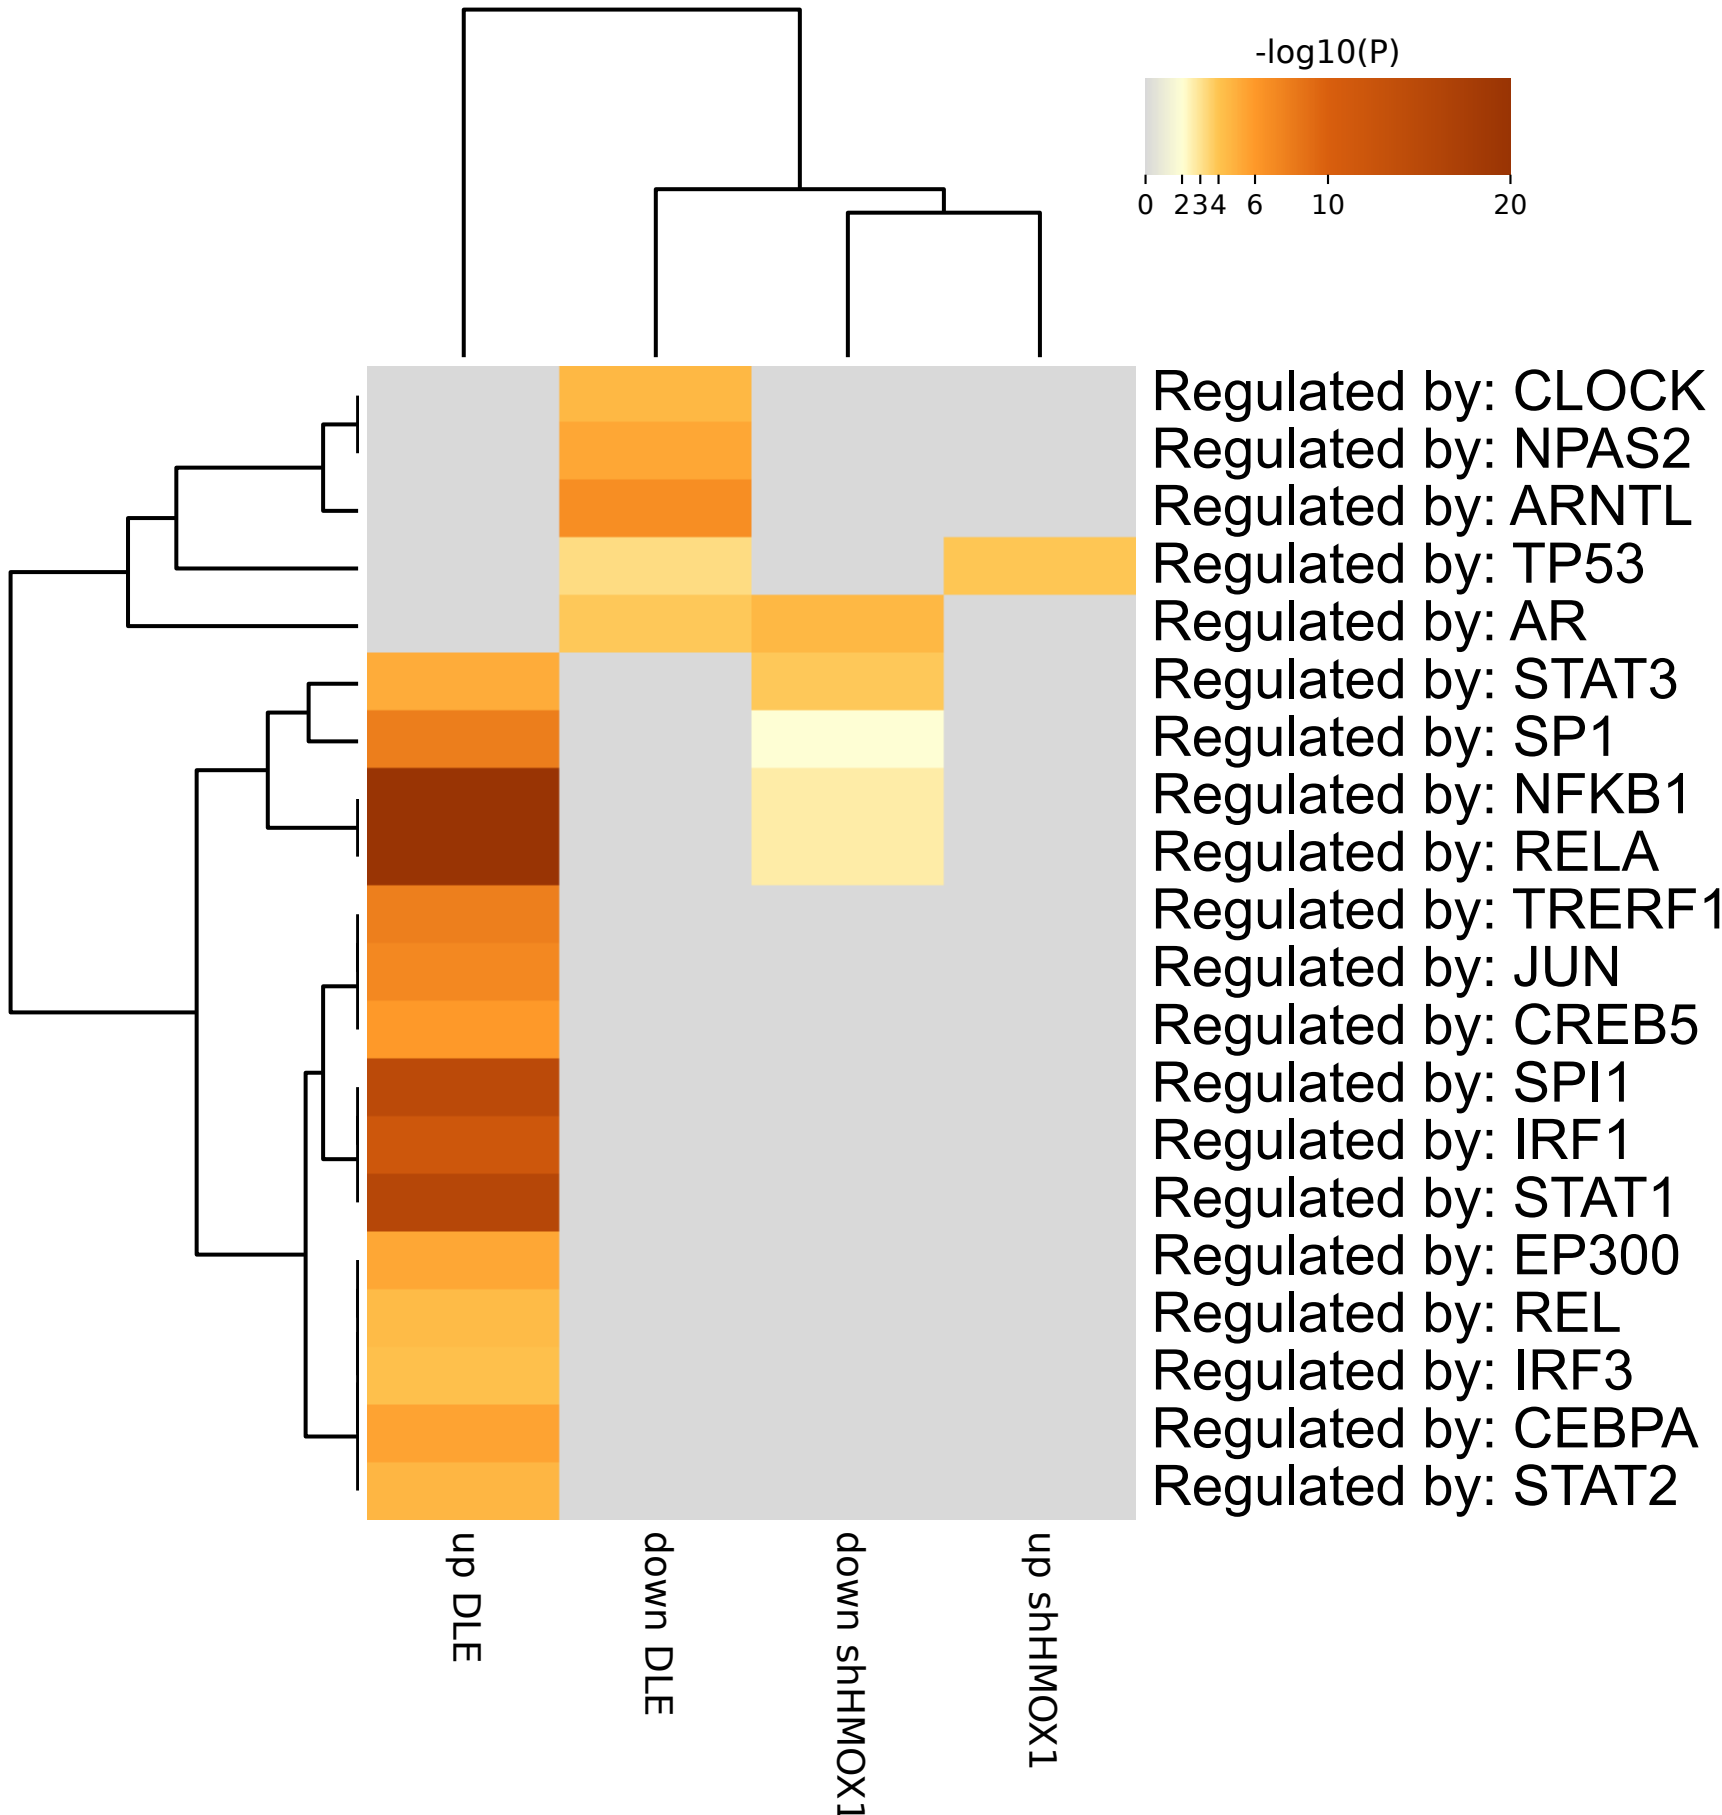

Supplement: s1 [file s1]

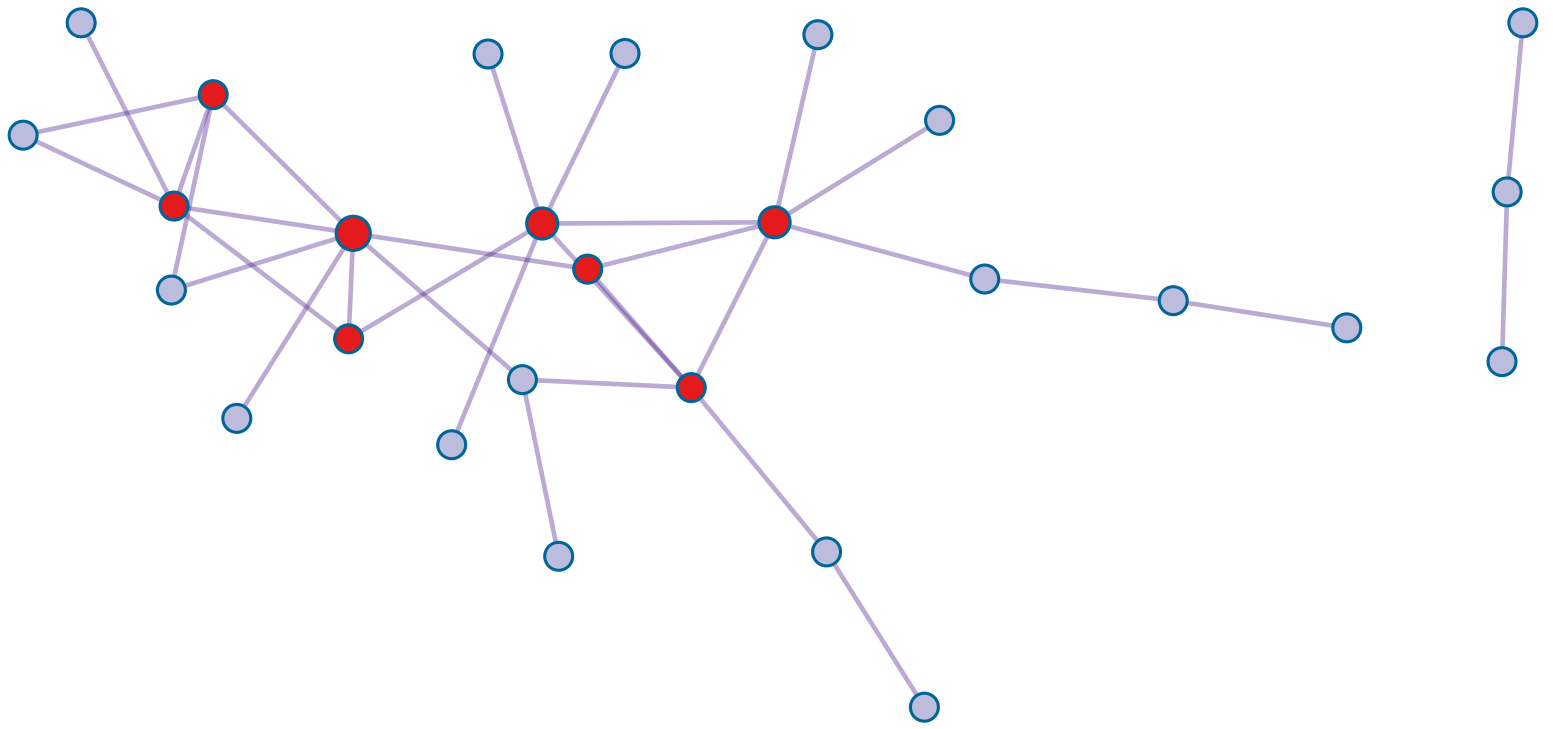

■ MCODE1

 created by  
<http://metascape.org>

Supplement: s1 [file s1]

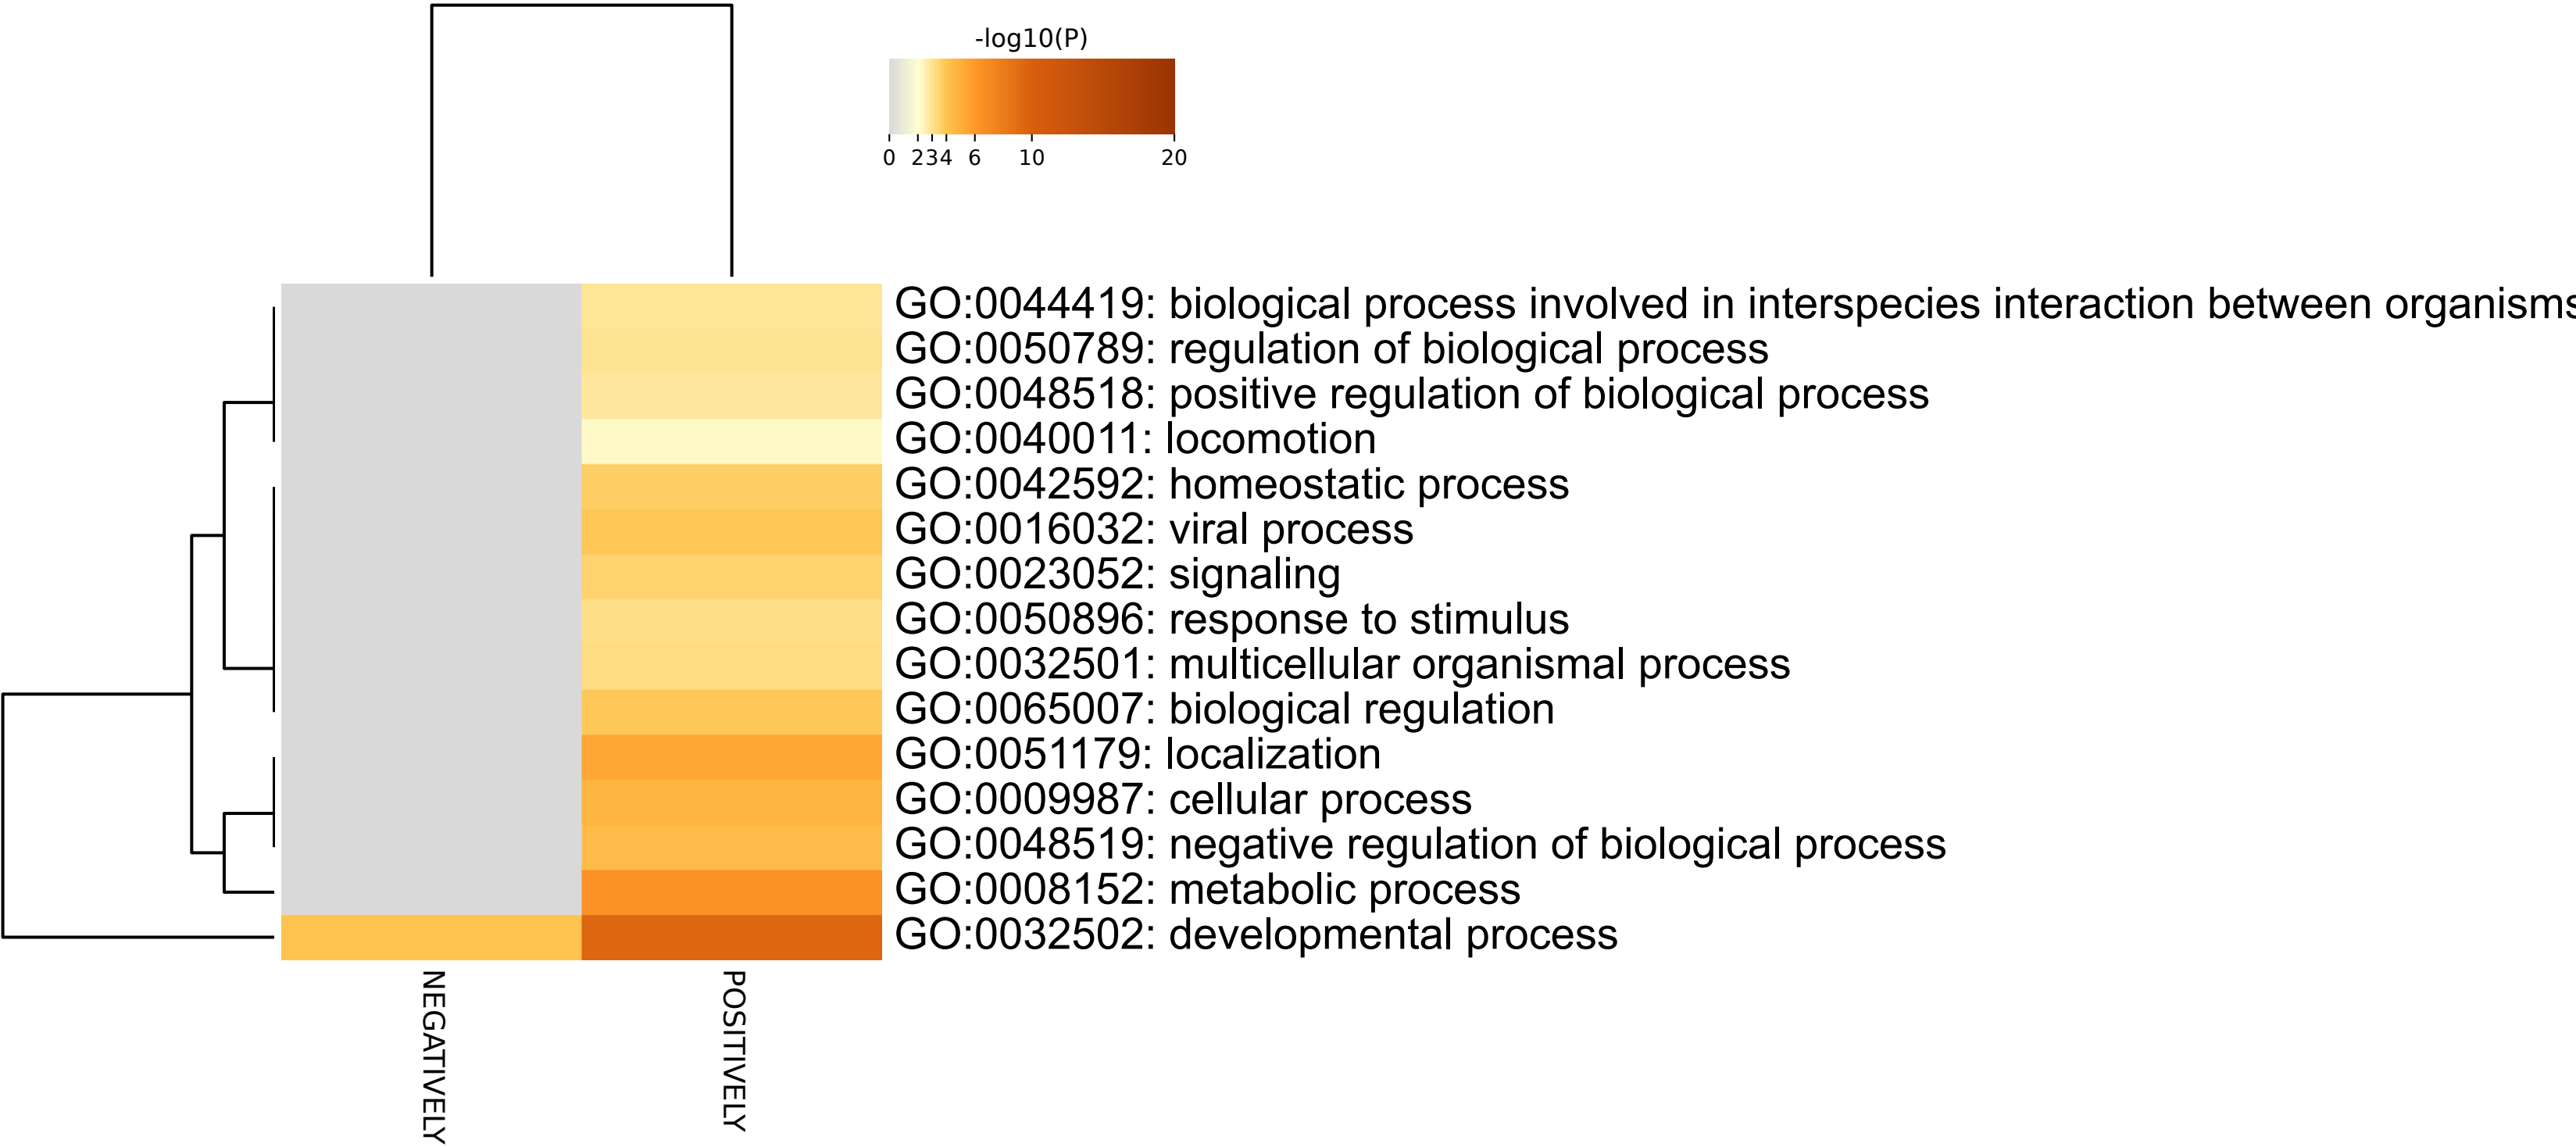

Supplement: s1 [file s1]

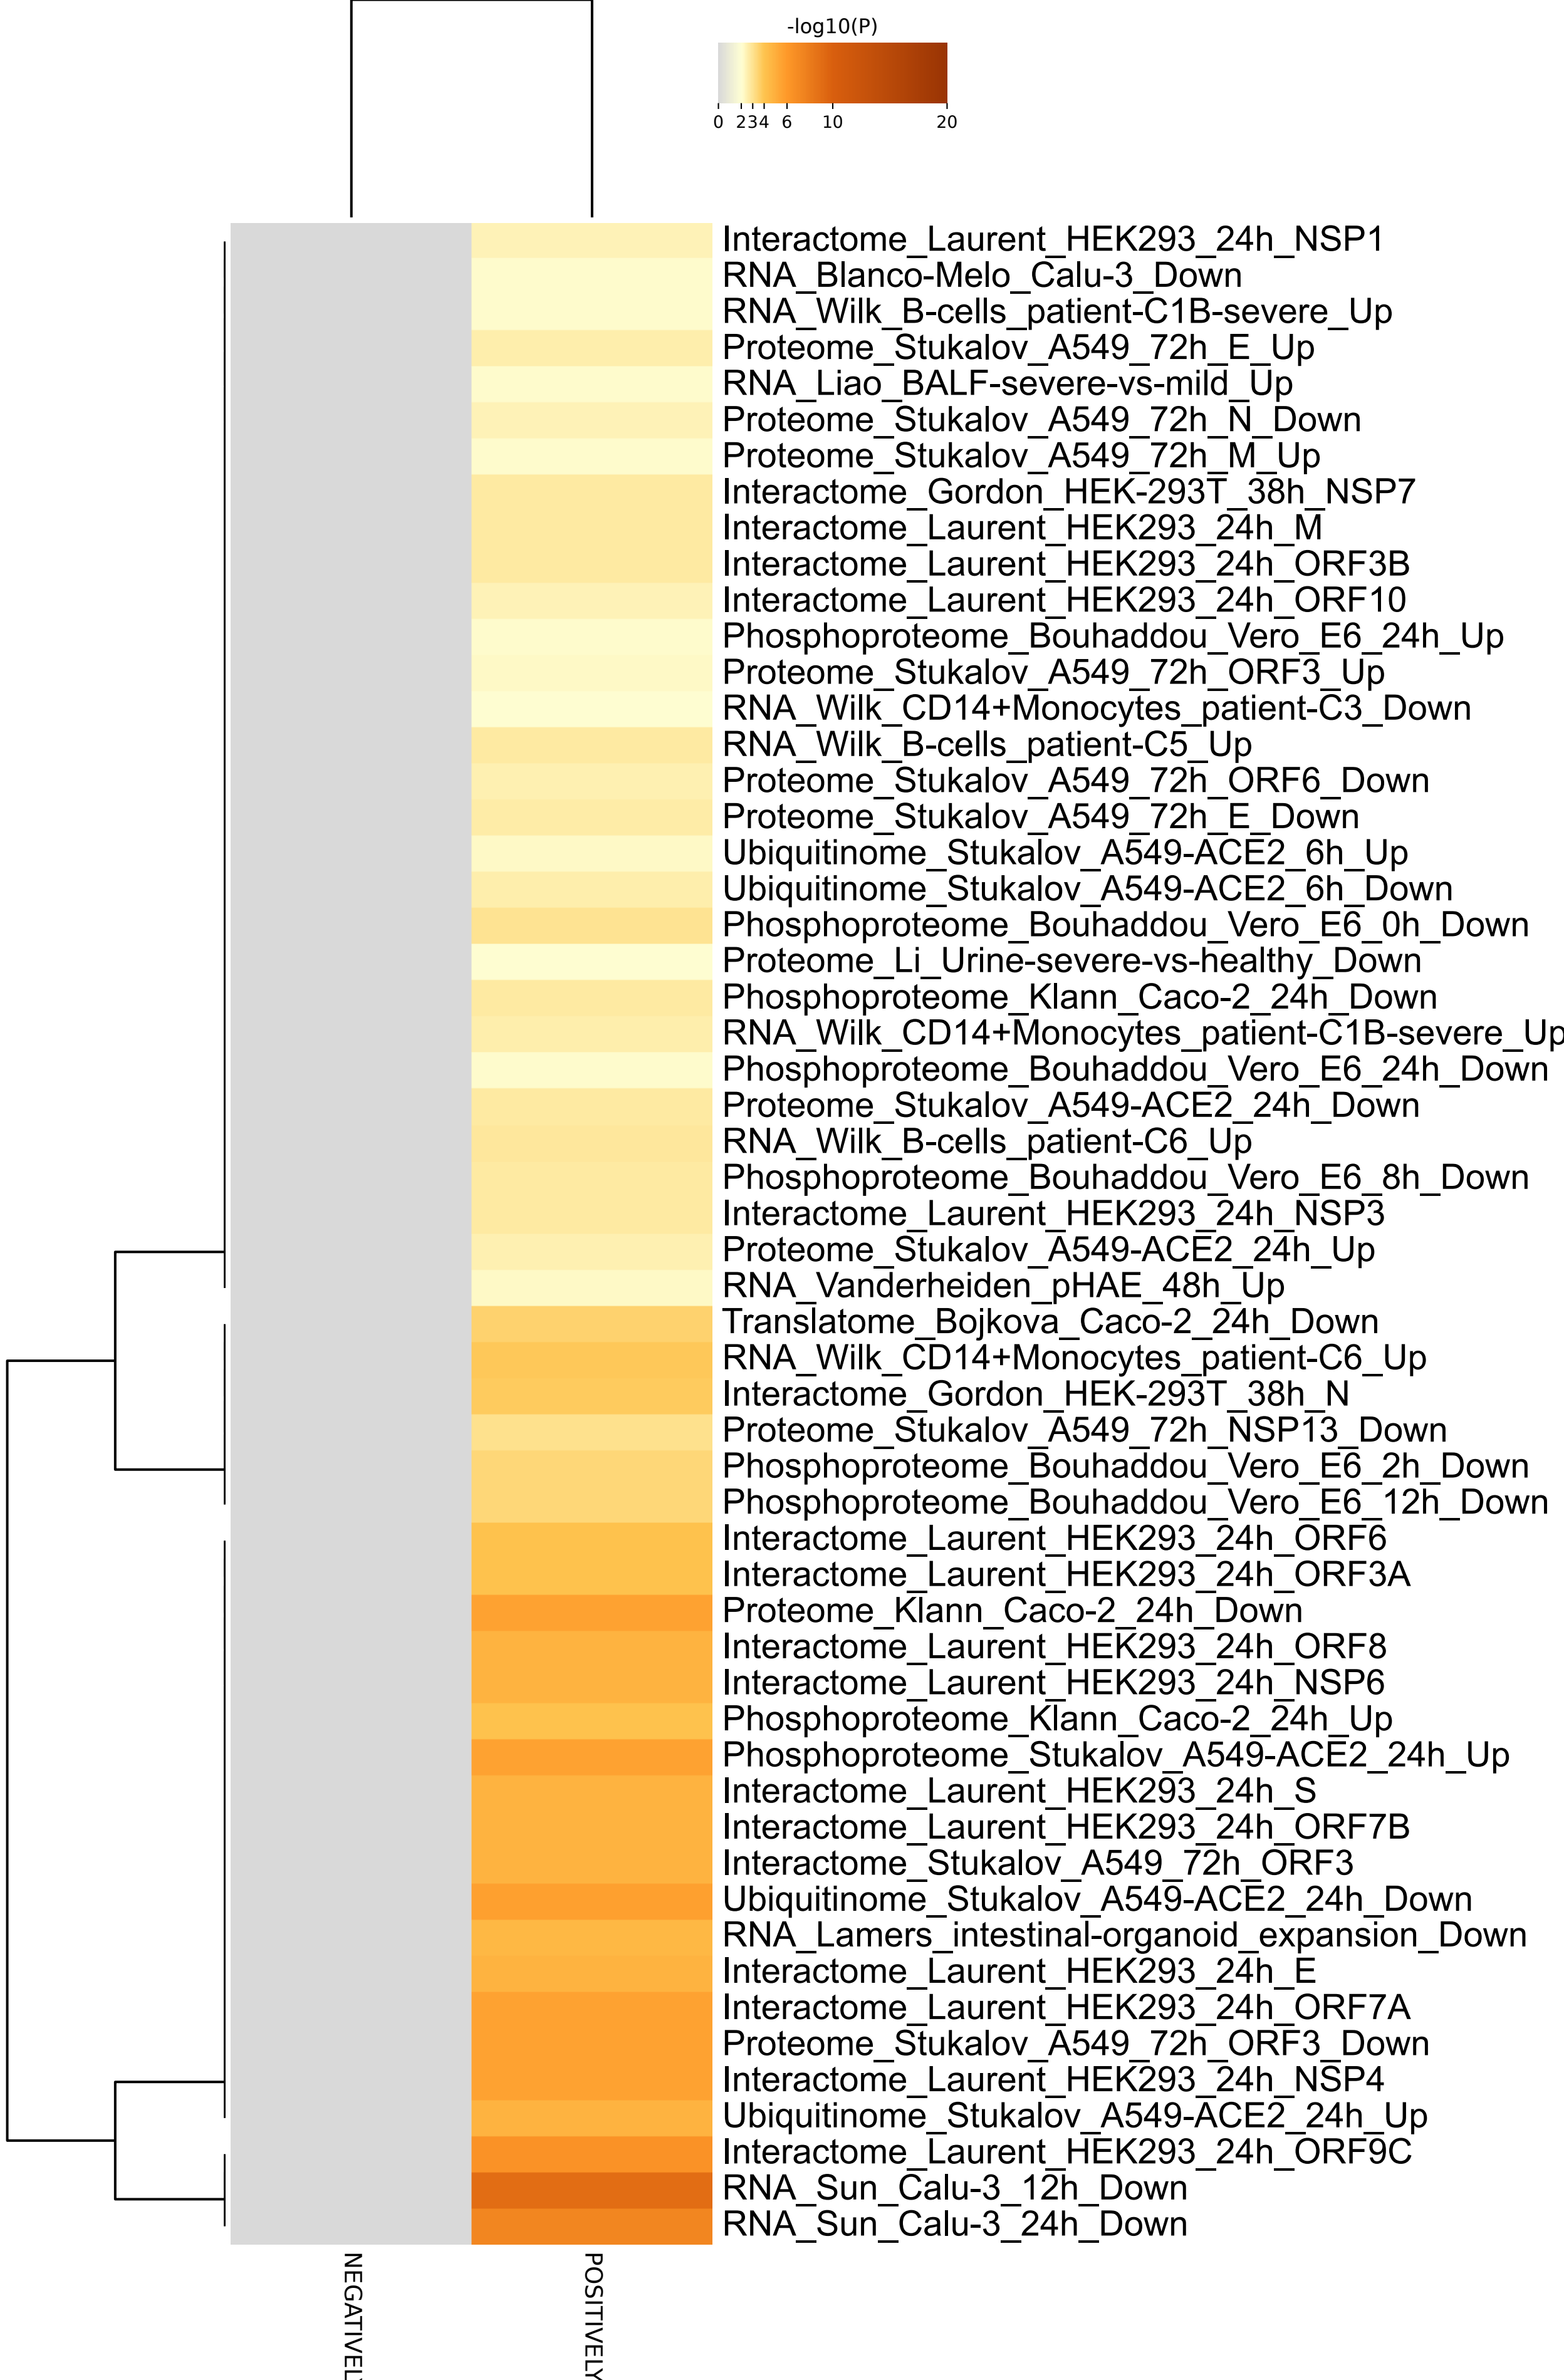

Supplement: s1 [file s1]

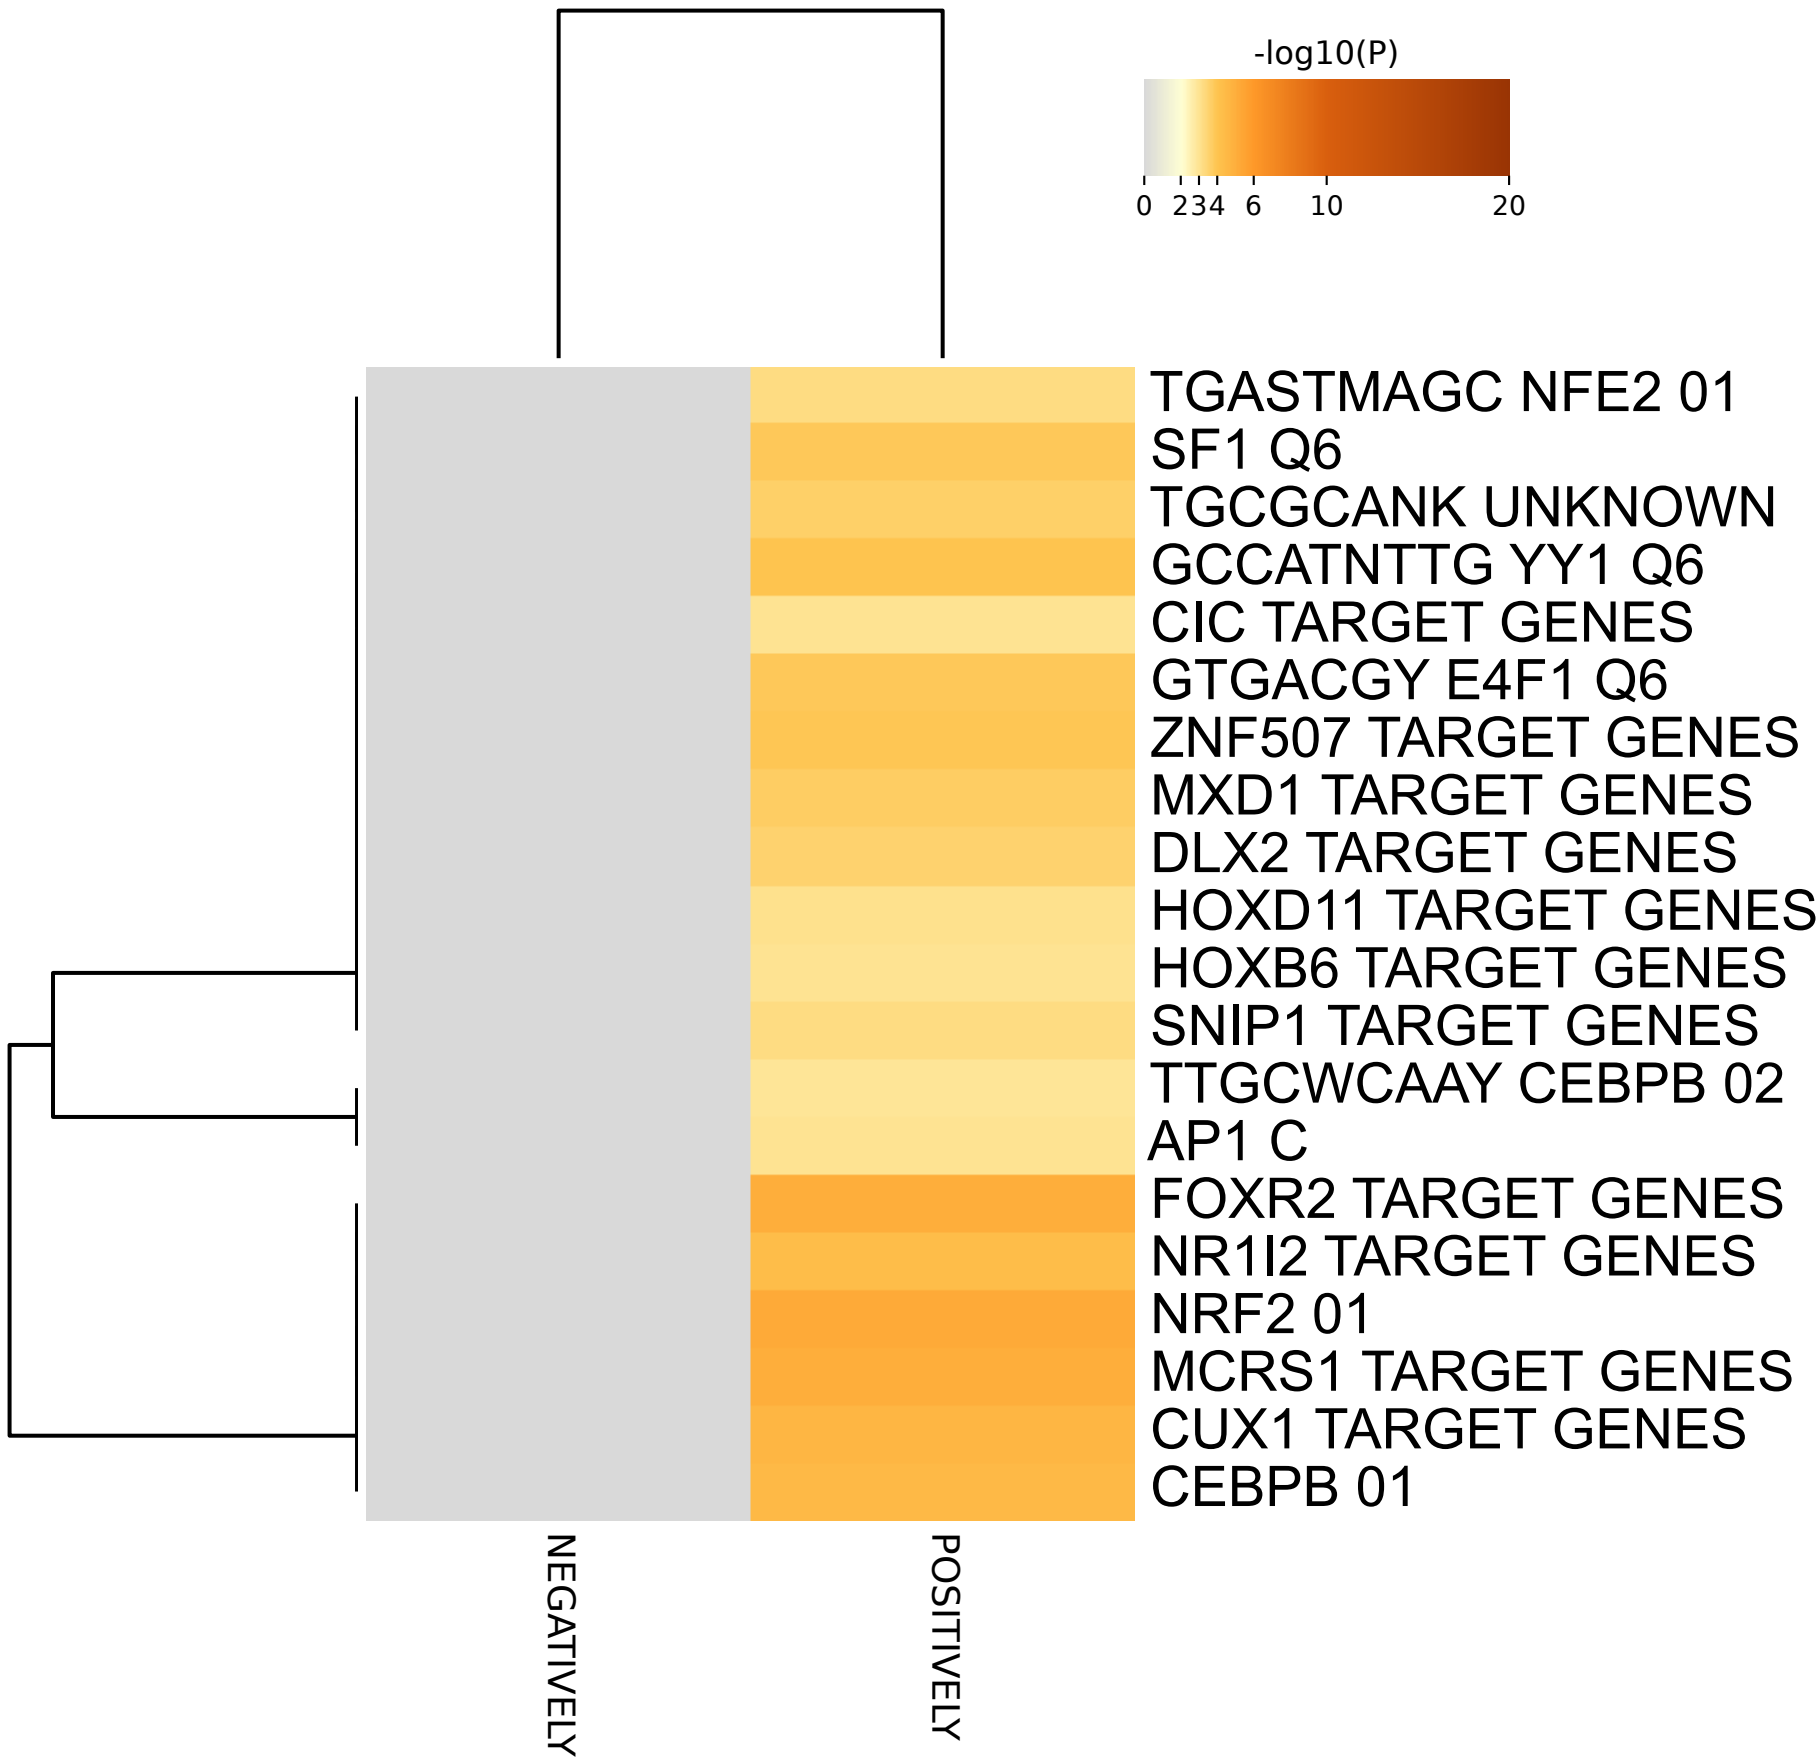

Supplement: s1 [file s1]

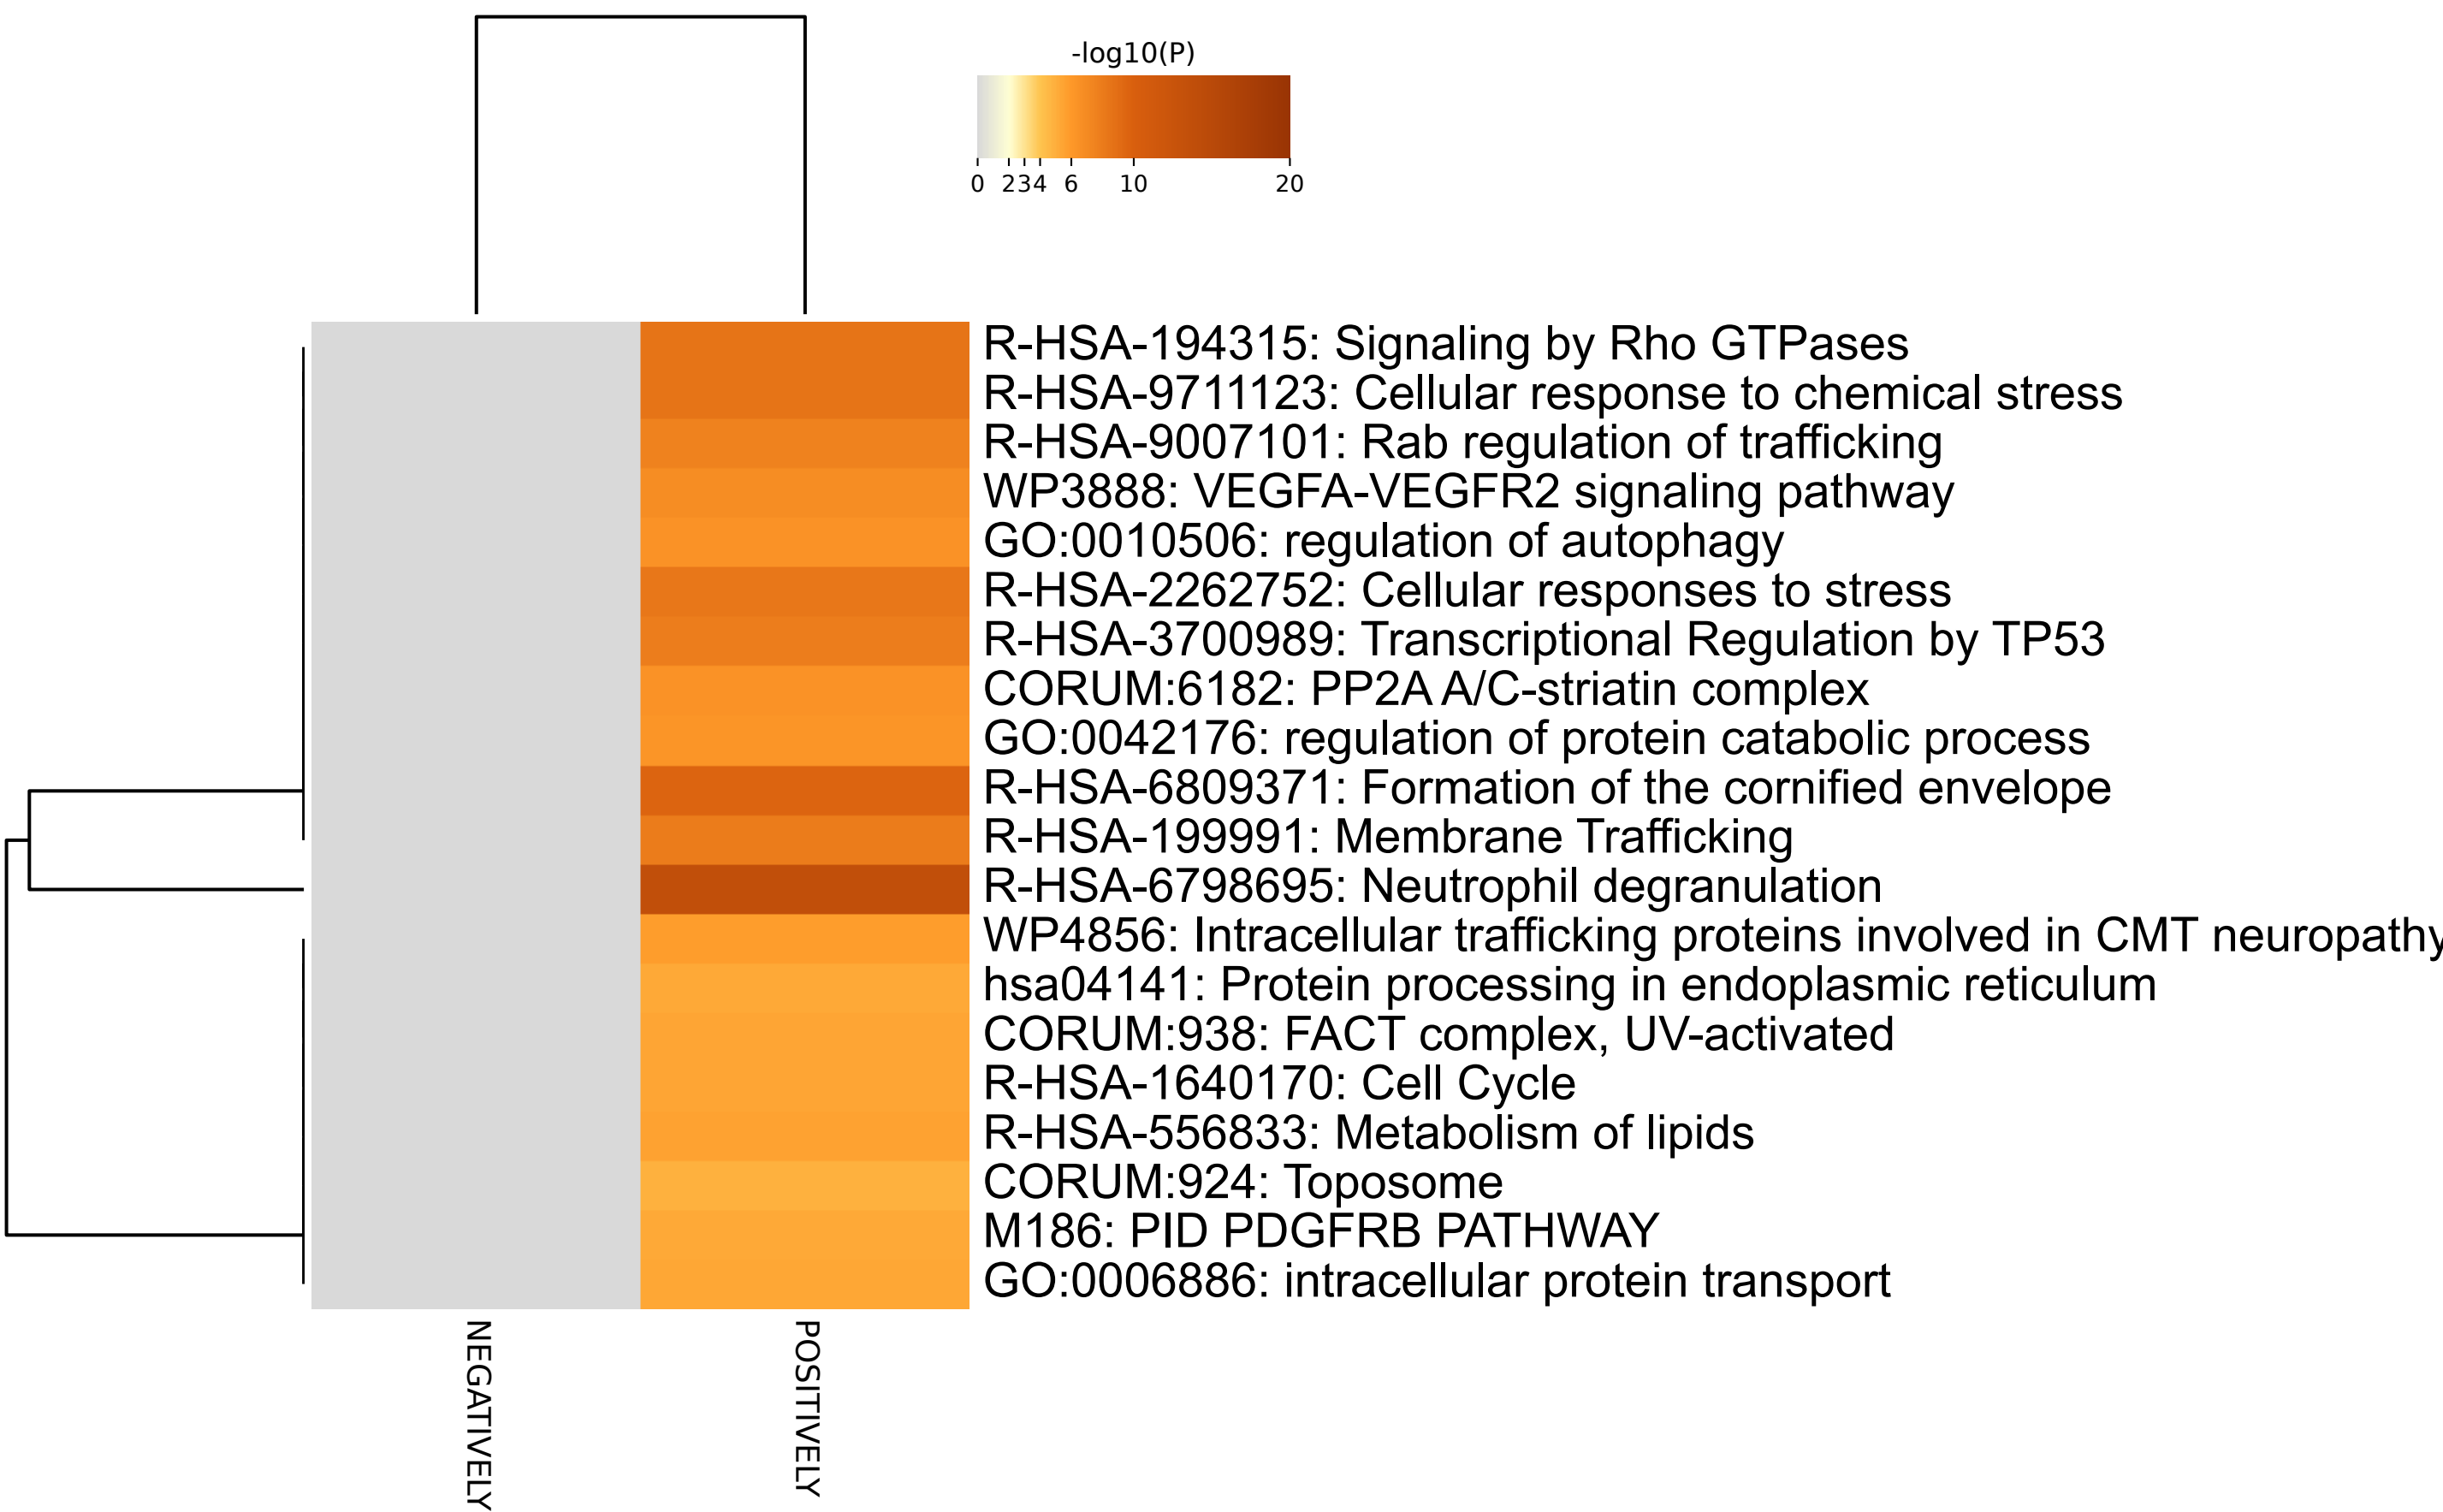

Supplement: s1 [file s1]

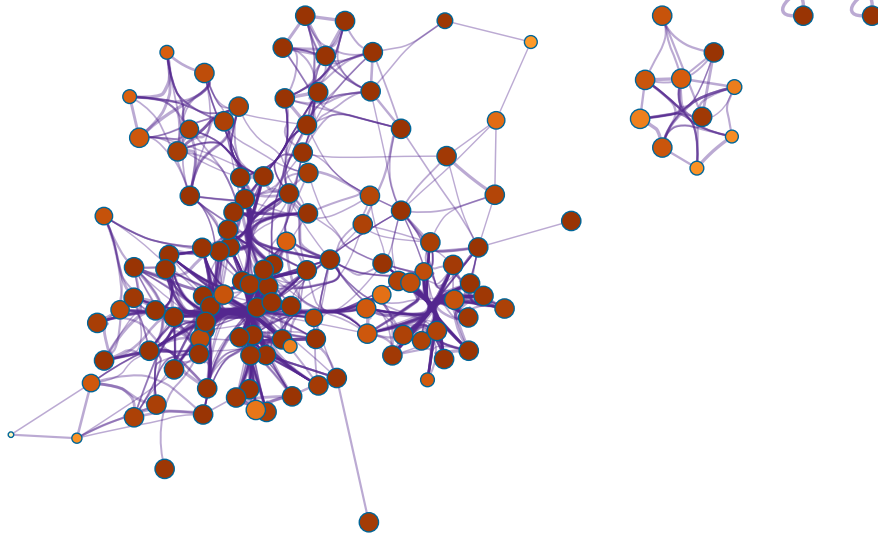



 created by  
<http://metascape.org>

Supplement: s1 [file s1]

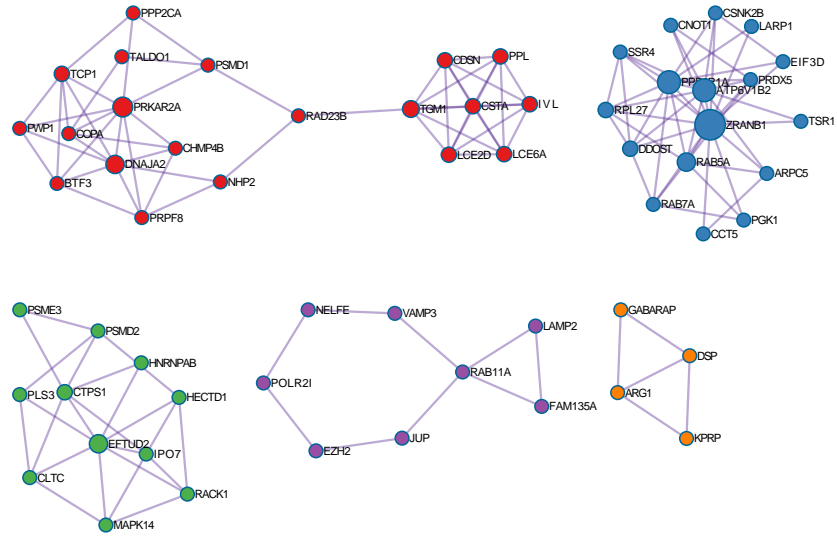

■ MCODE1  
■ MCODE2  
■ MCODE3  
■ MCODE4  
■ MCODE5

 created by  
<http://metascape.org>

Supplement: s1 [file s1]

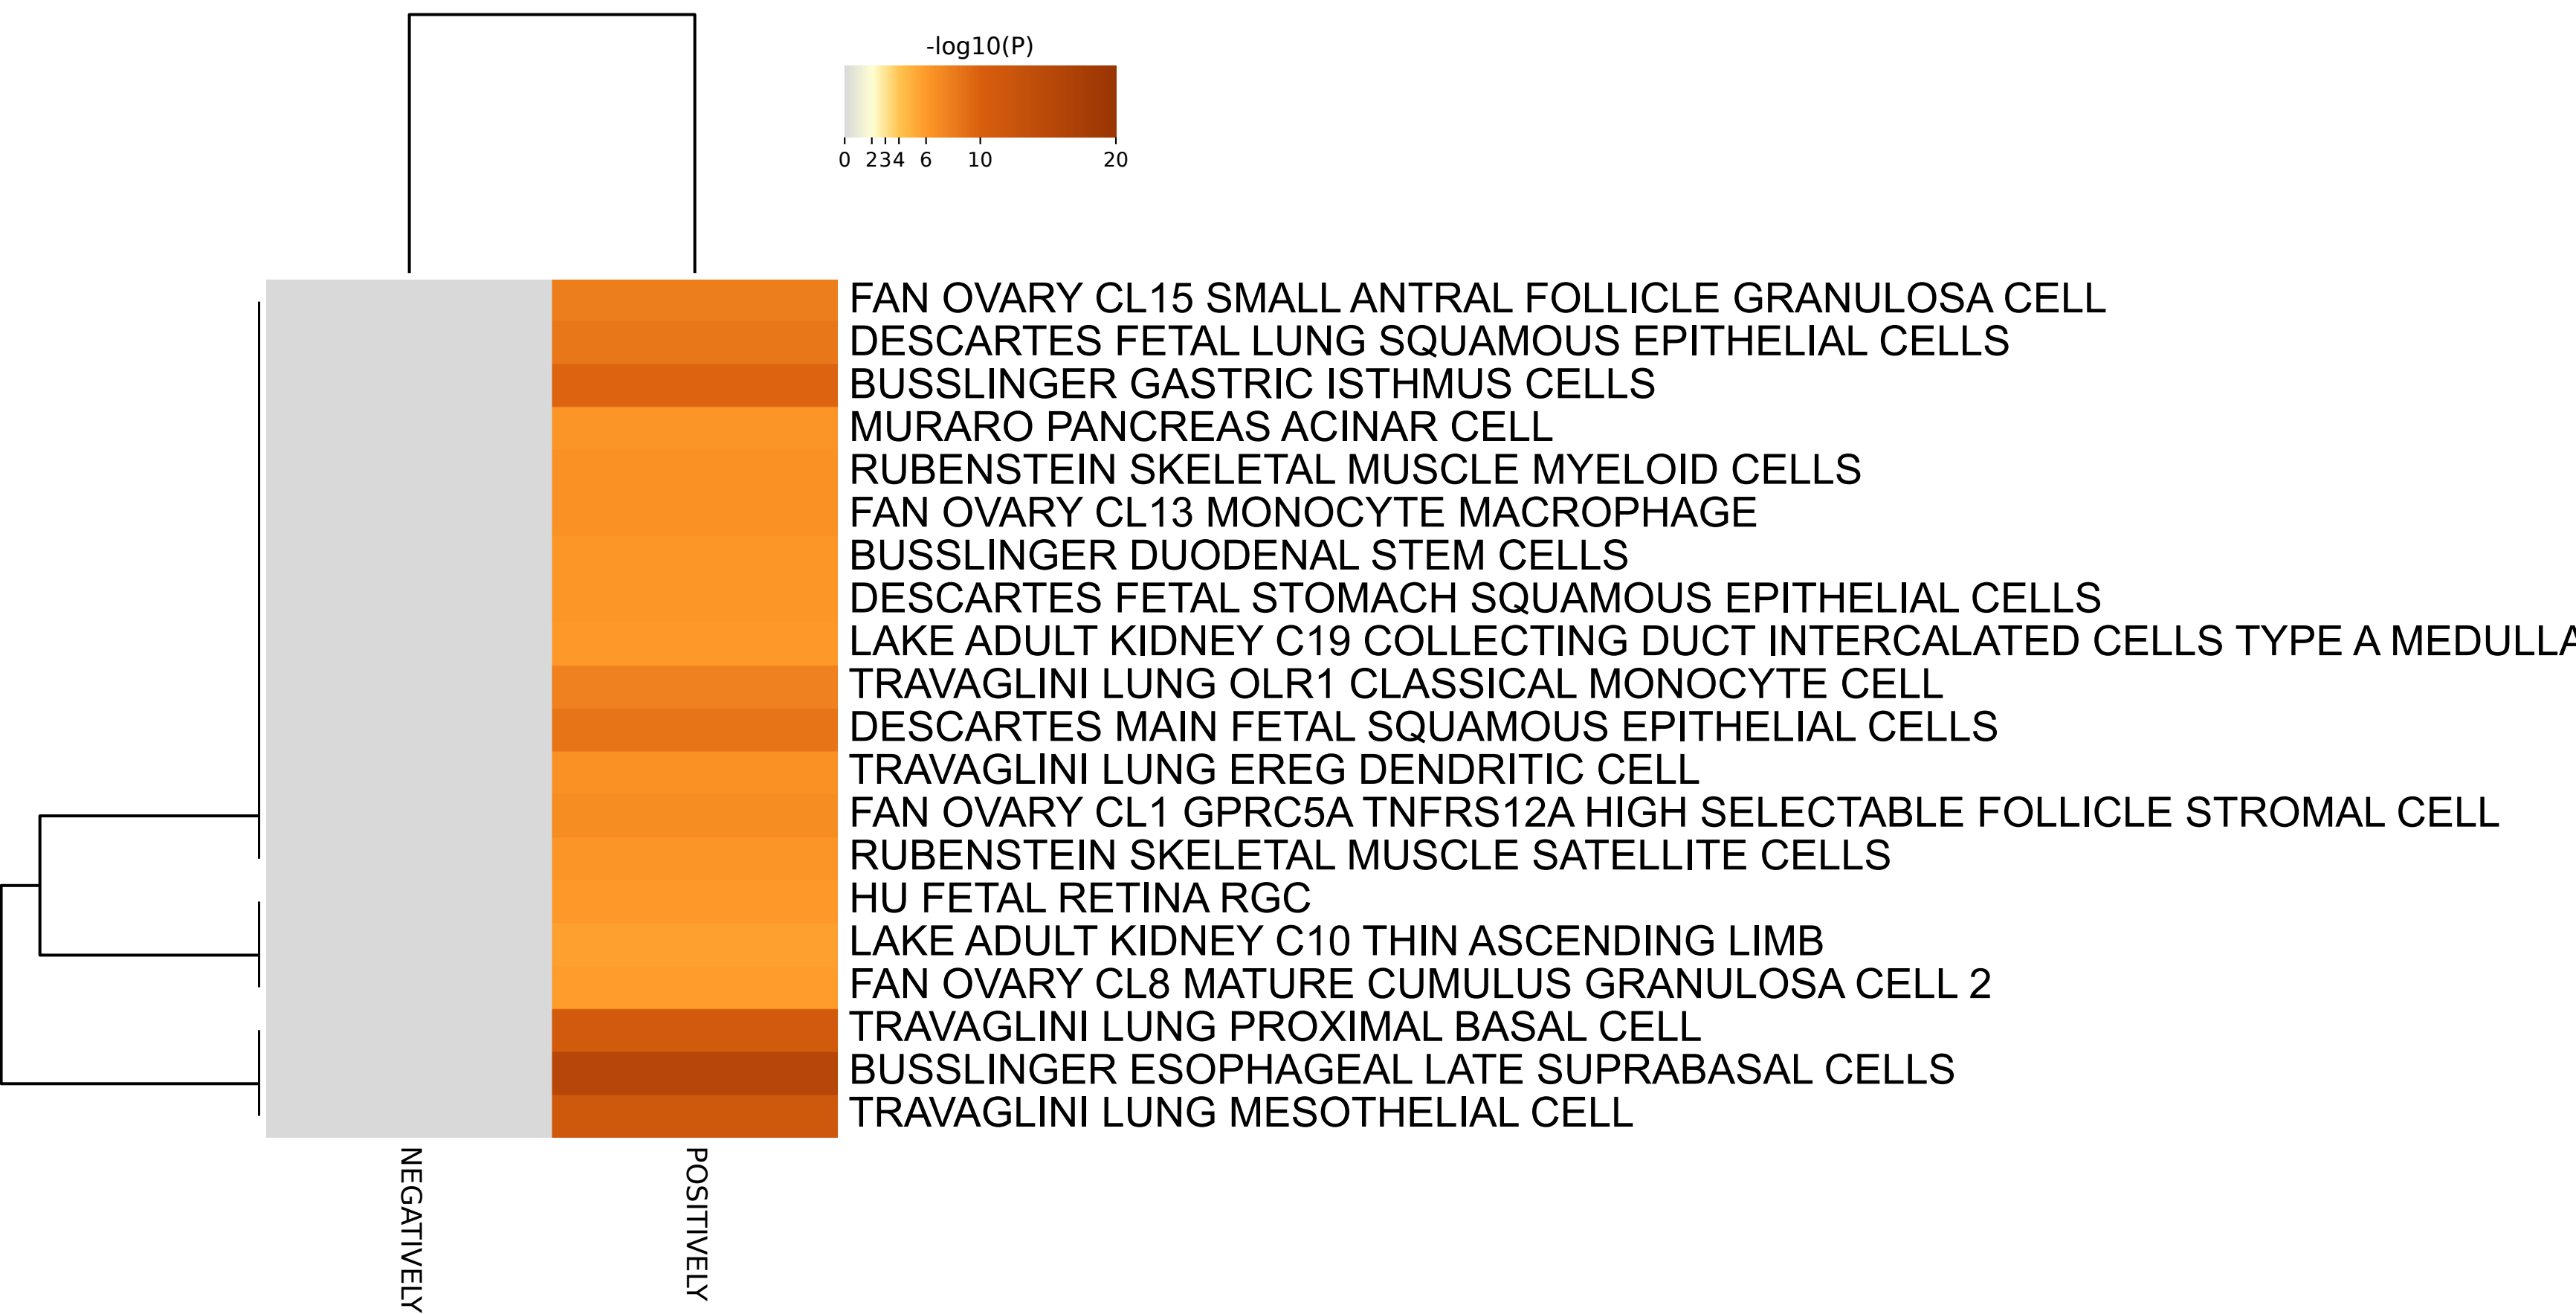

Supplement: s1 [file s1]

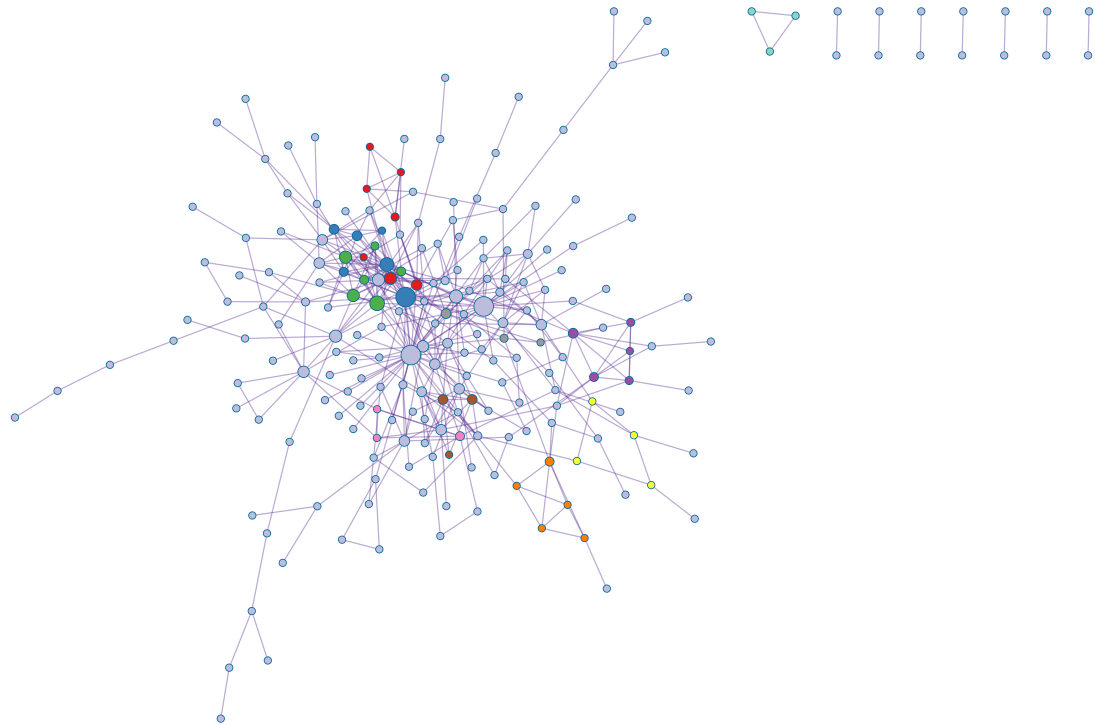

- MCODE1
- MCODE2
- MCODE3
- MCODE4
- MCODE5
- MCODE6
- MCODE7
- MCODE8
- MCODE9
- MCODE10

Supplement: s1 [file s1]

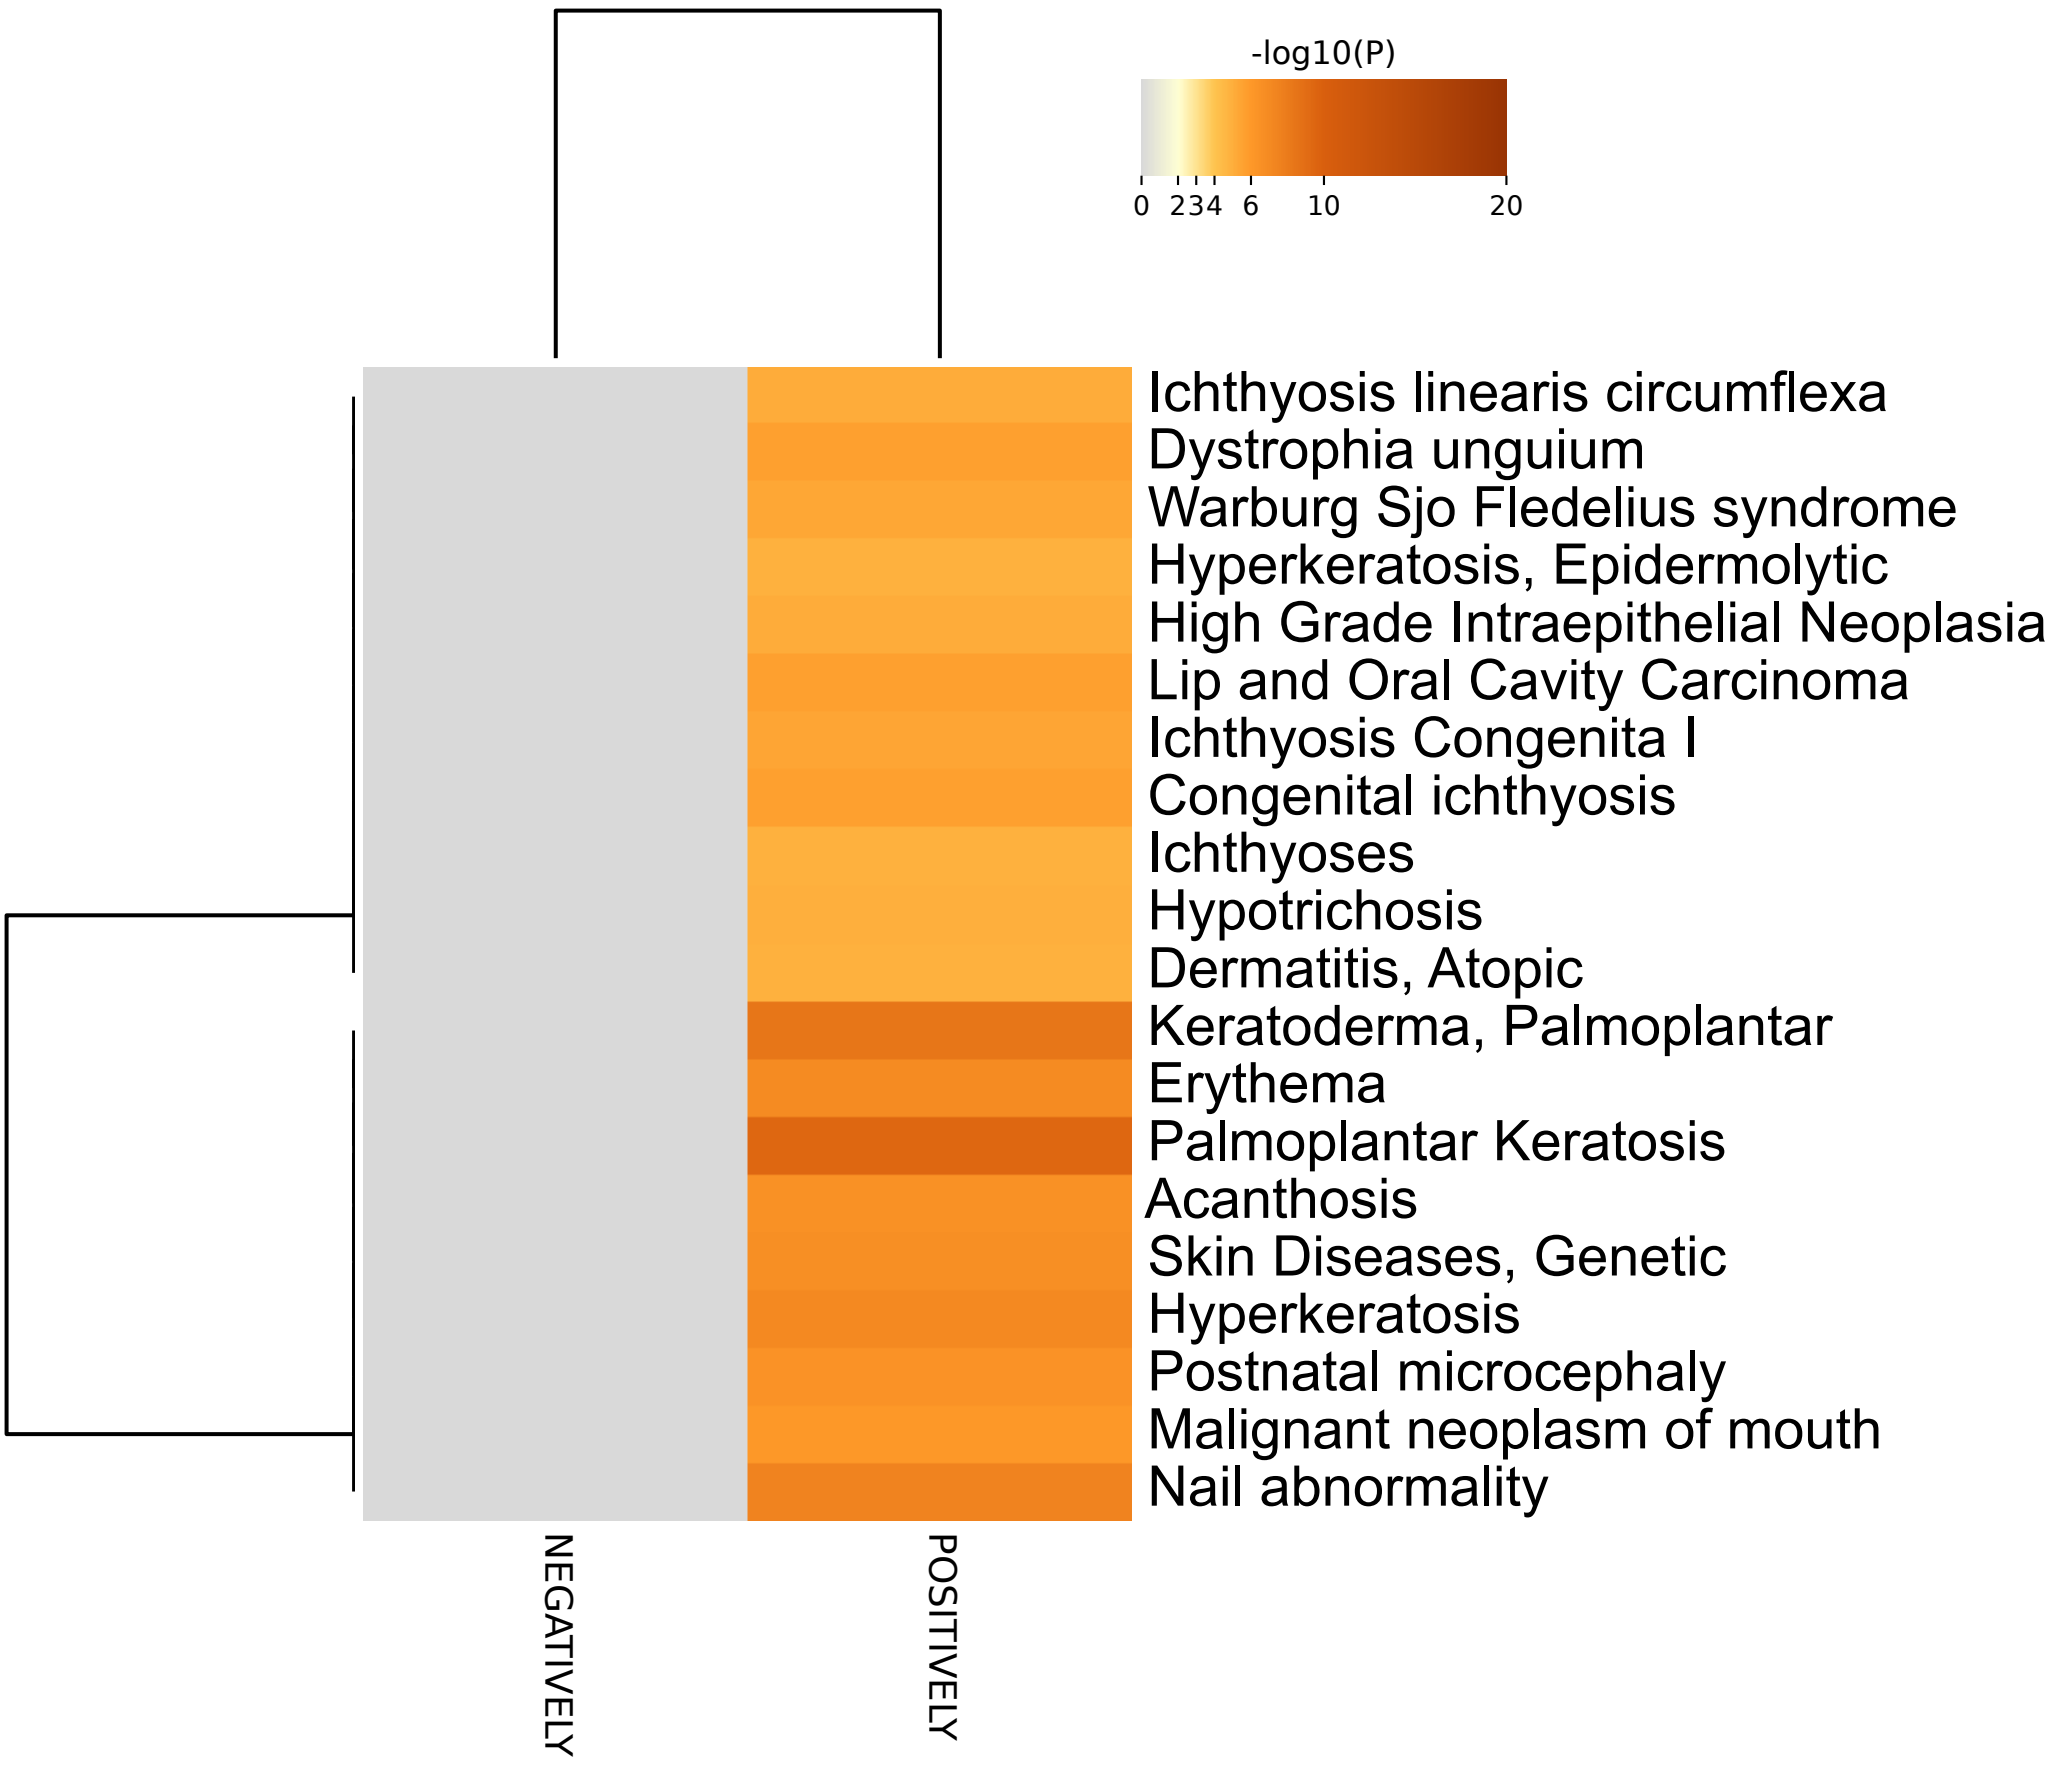

Supplement: s1 [file s1]

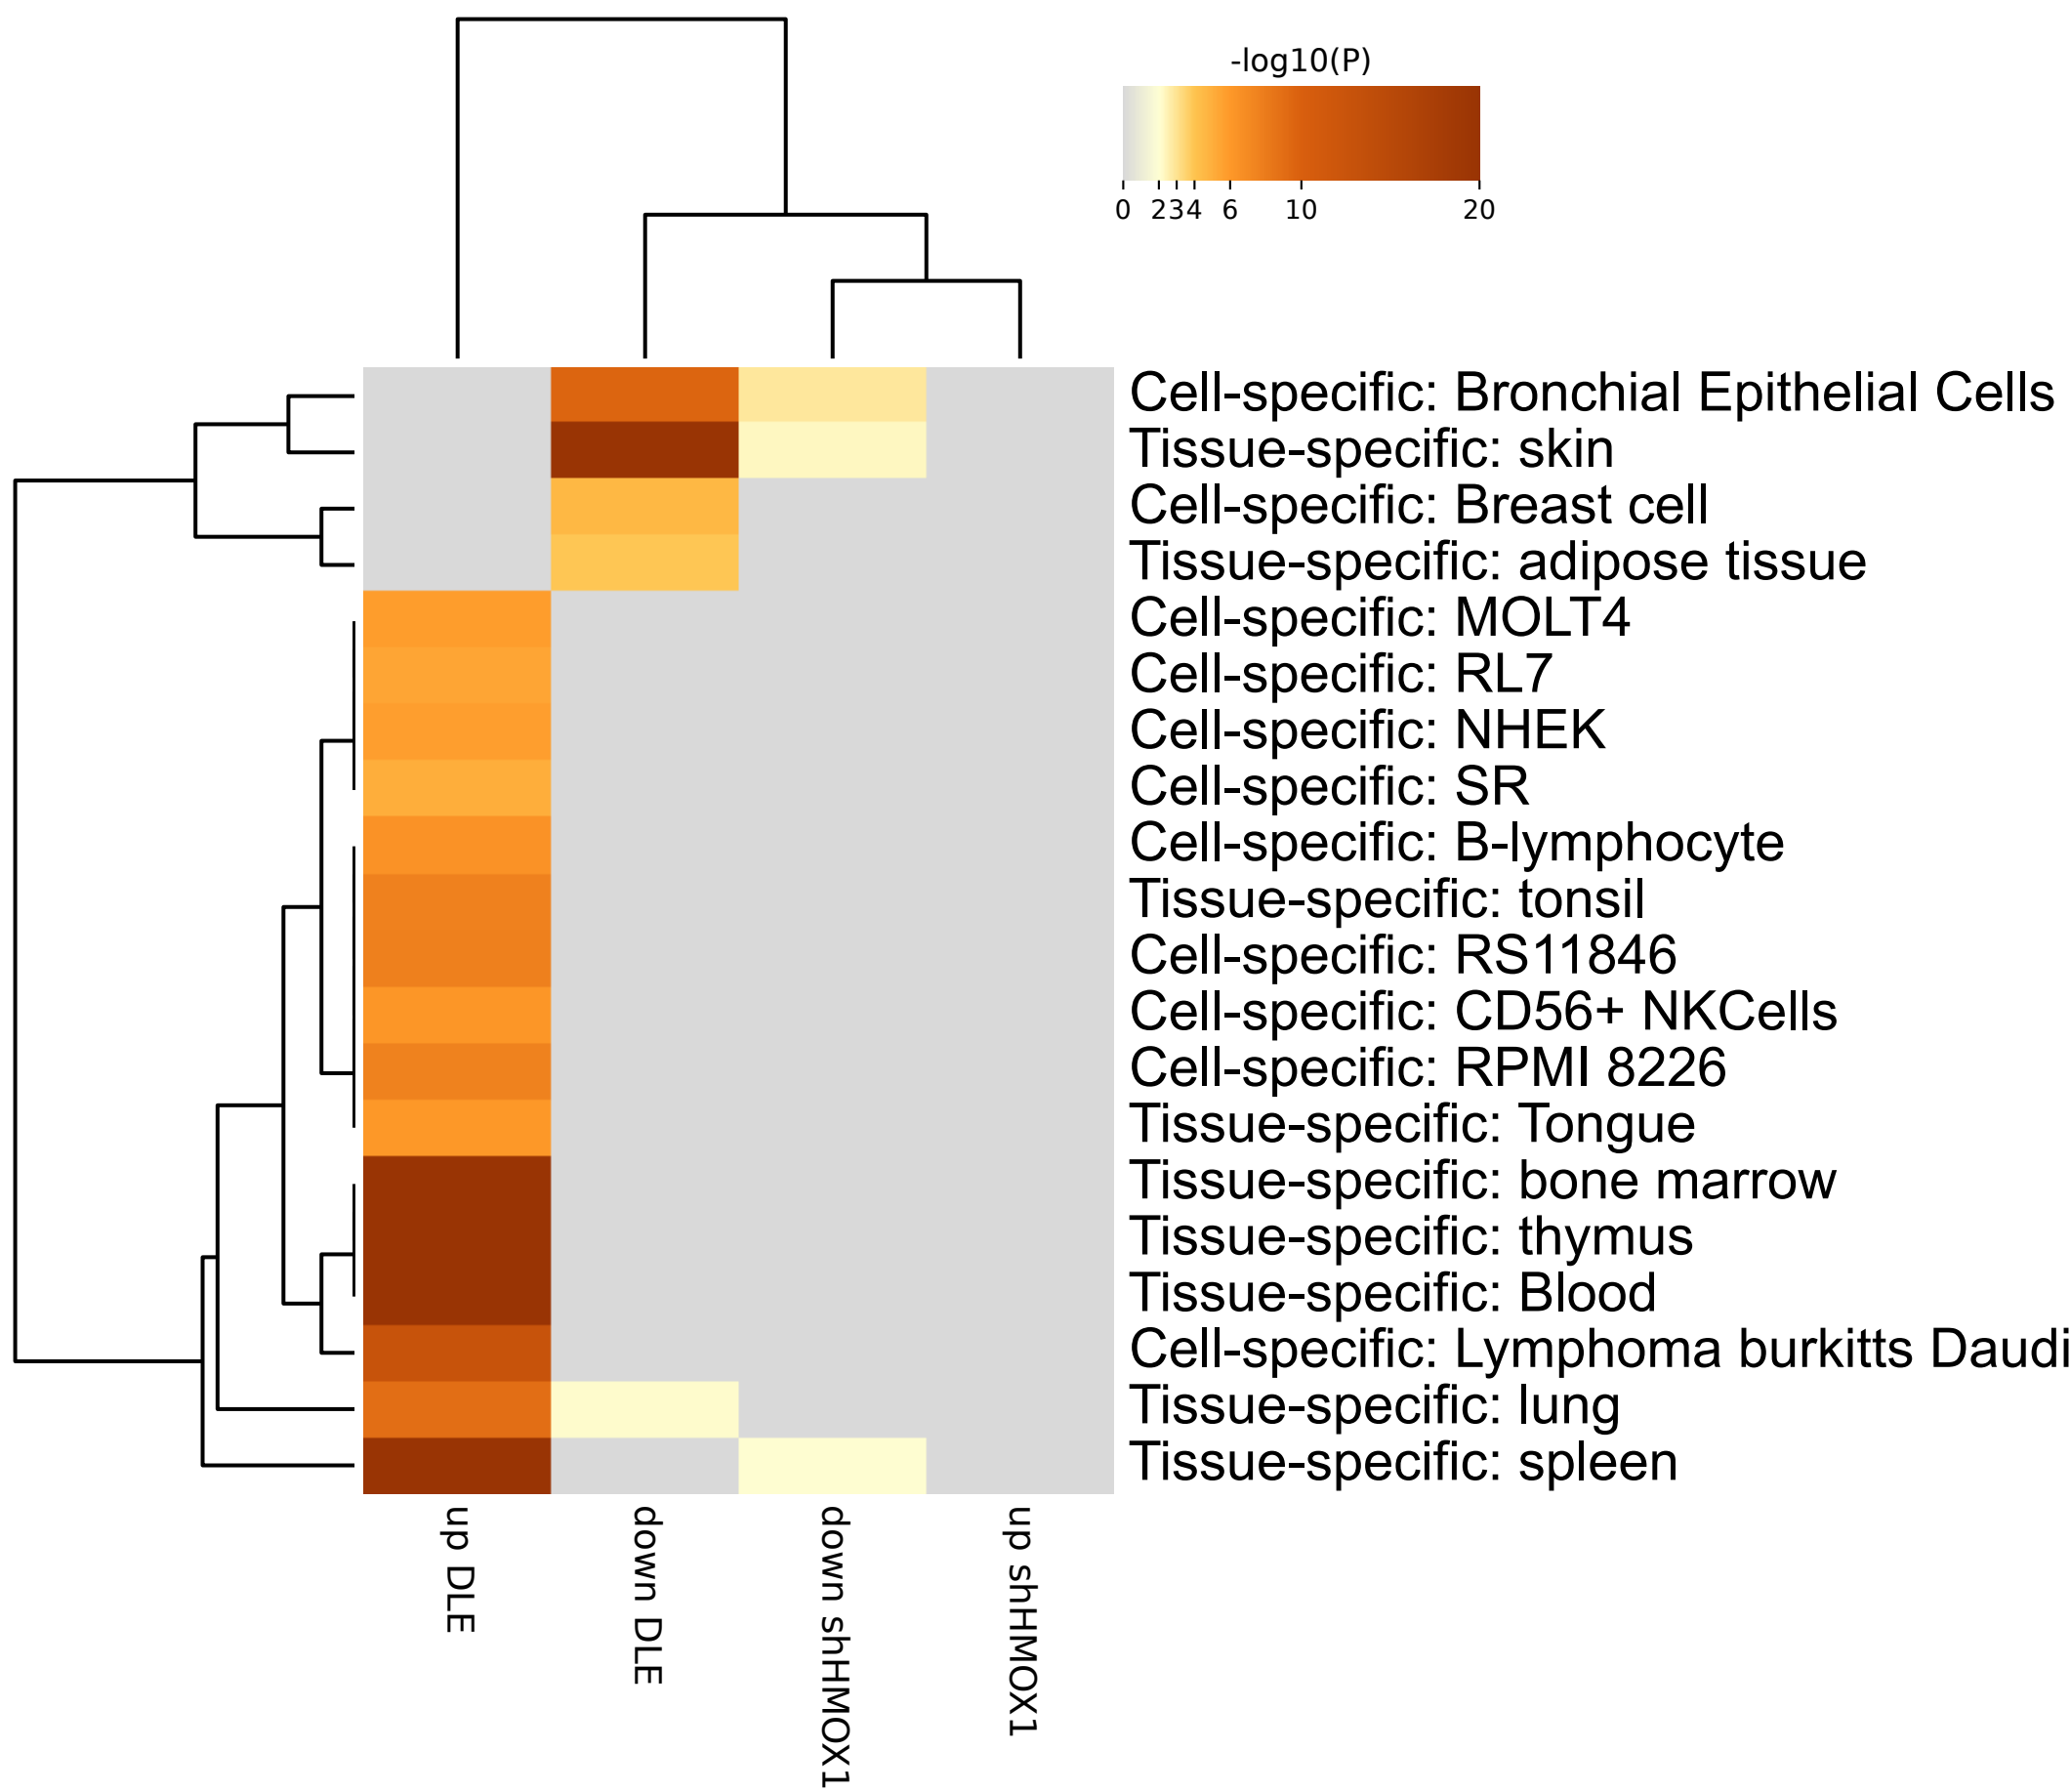

Supplement: s1 [file s1]

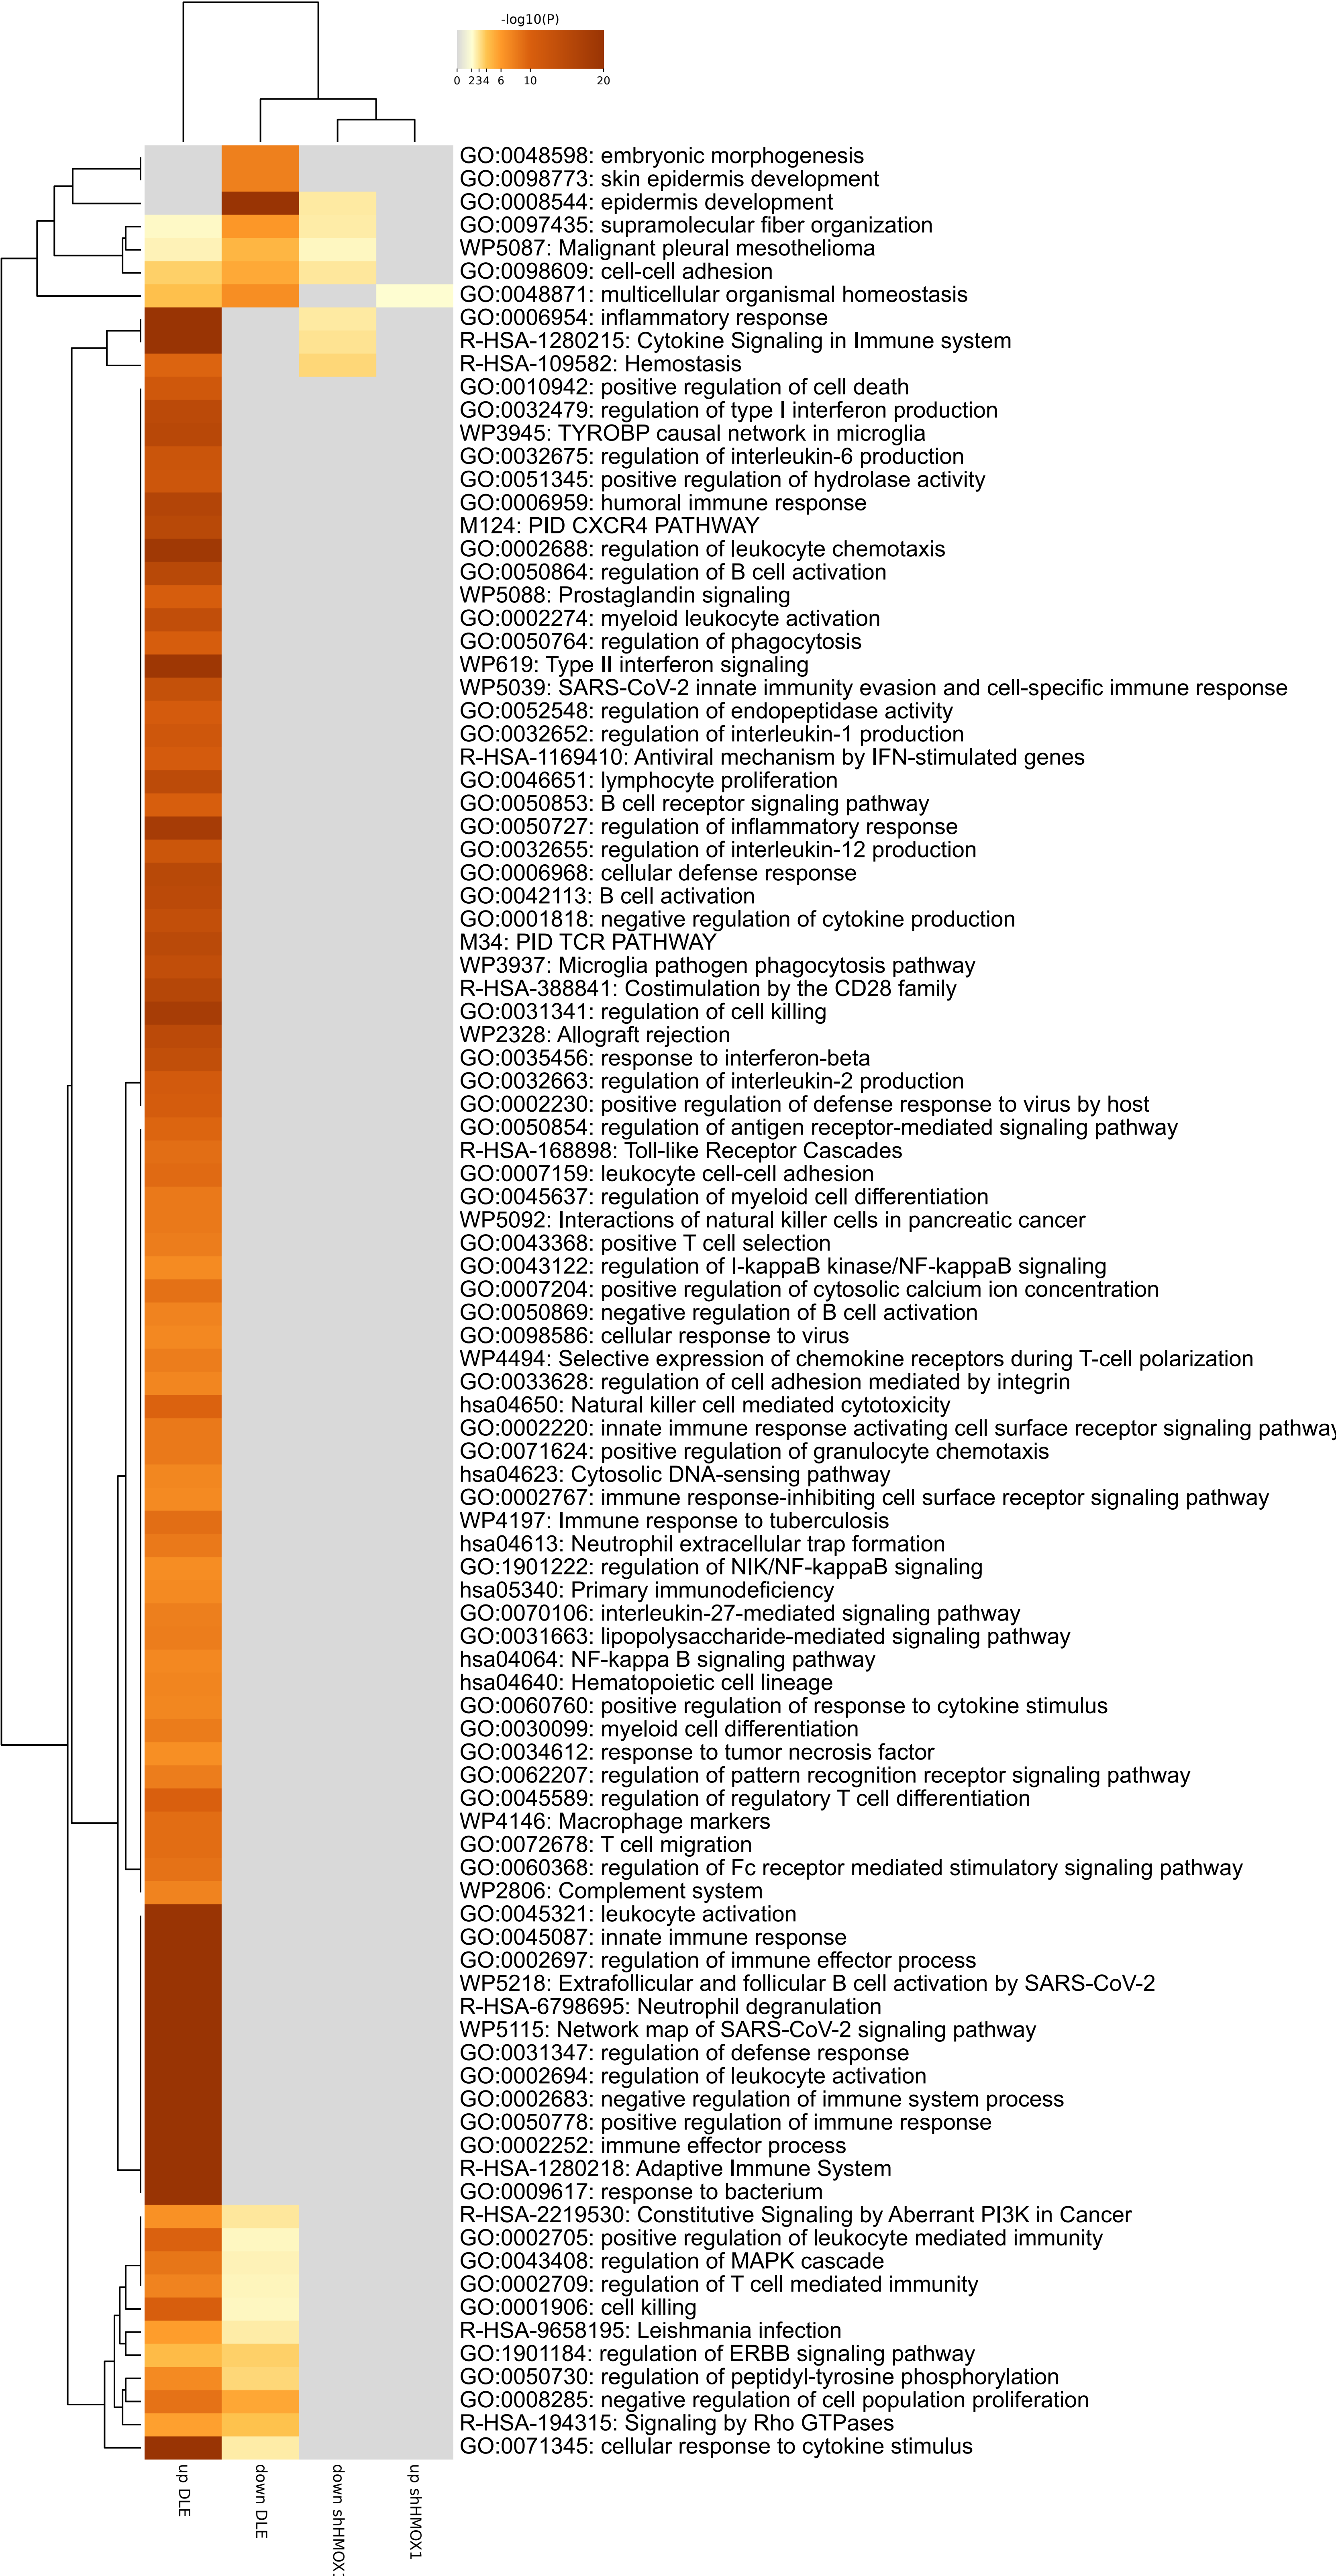

Supplement: s1 [file s1]

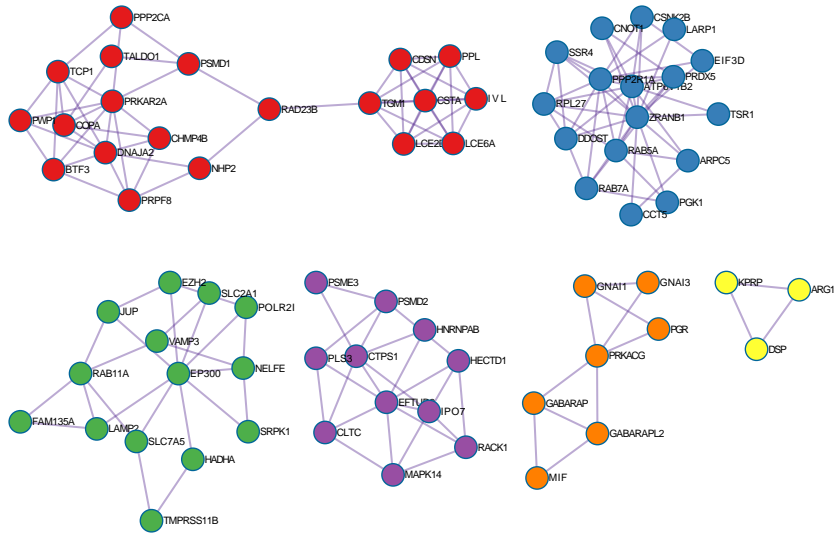

- MCODE1
- MCODE2
- MCODE3
- MCODE4
- MCODE5
- MCODE6

 created by  
<http://metascape.org>

Supplement: s1 [file s1]

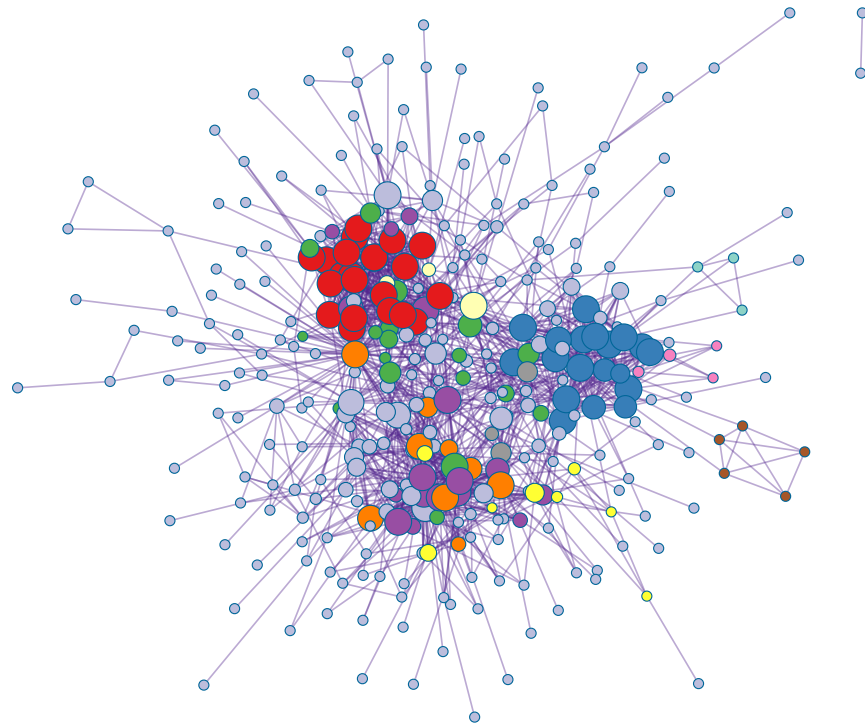

■ MCODE1  
■ MCODE2  
■ MCODE3  
■ MCODE4  
■ MCODE5  
■ MCODE6  
■ MCODE7  
■ MCODE8  
■ MCODE9  
■ MCODE10  
■ MCODE11

Supplement: s1 [file s1]

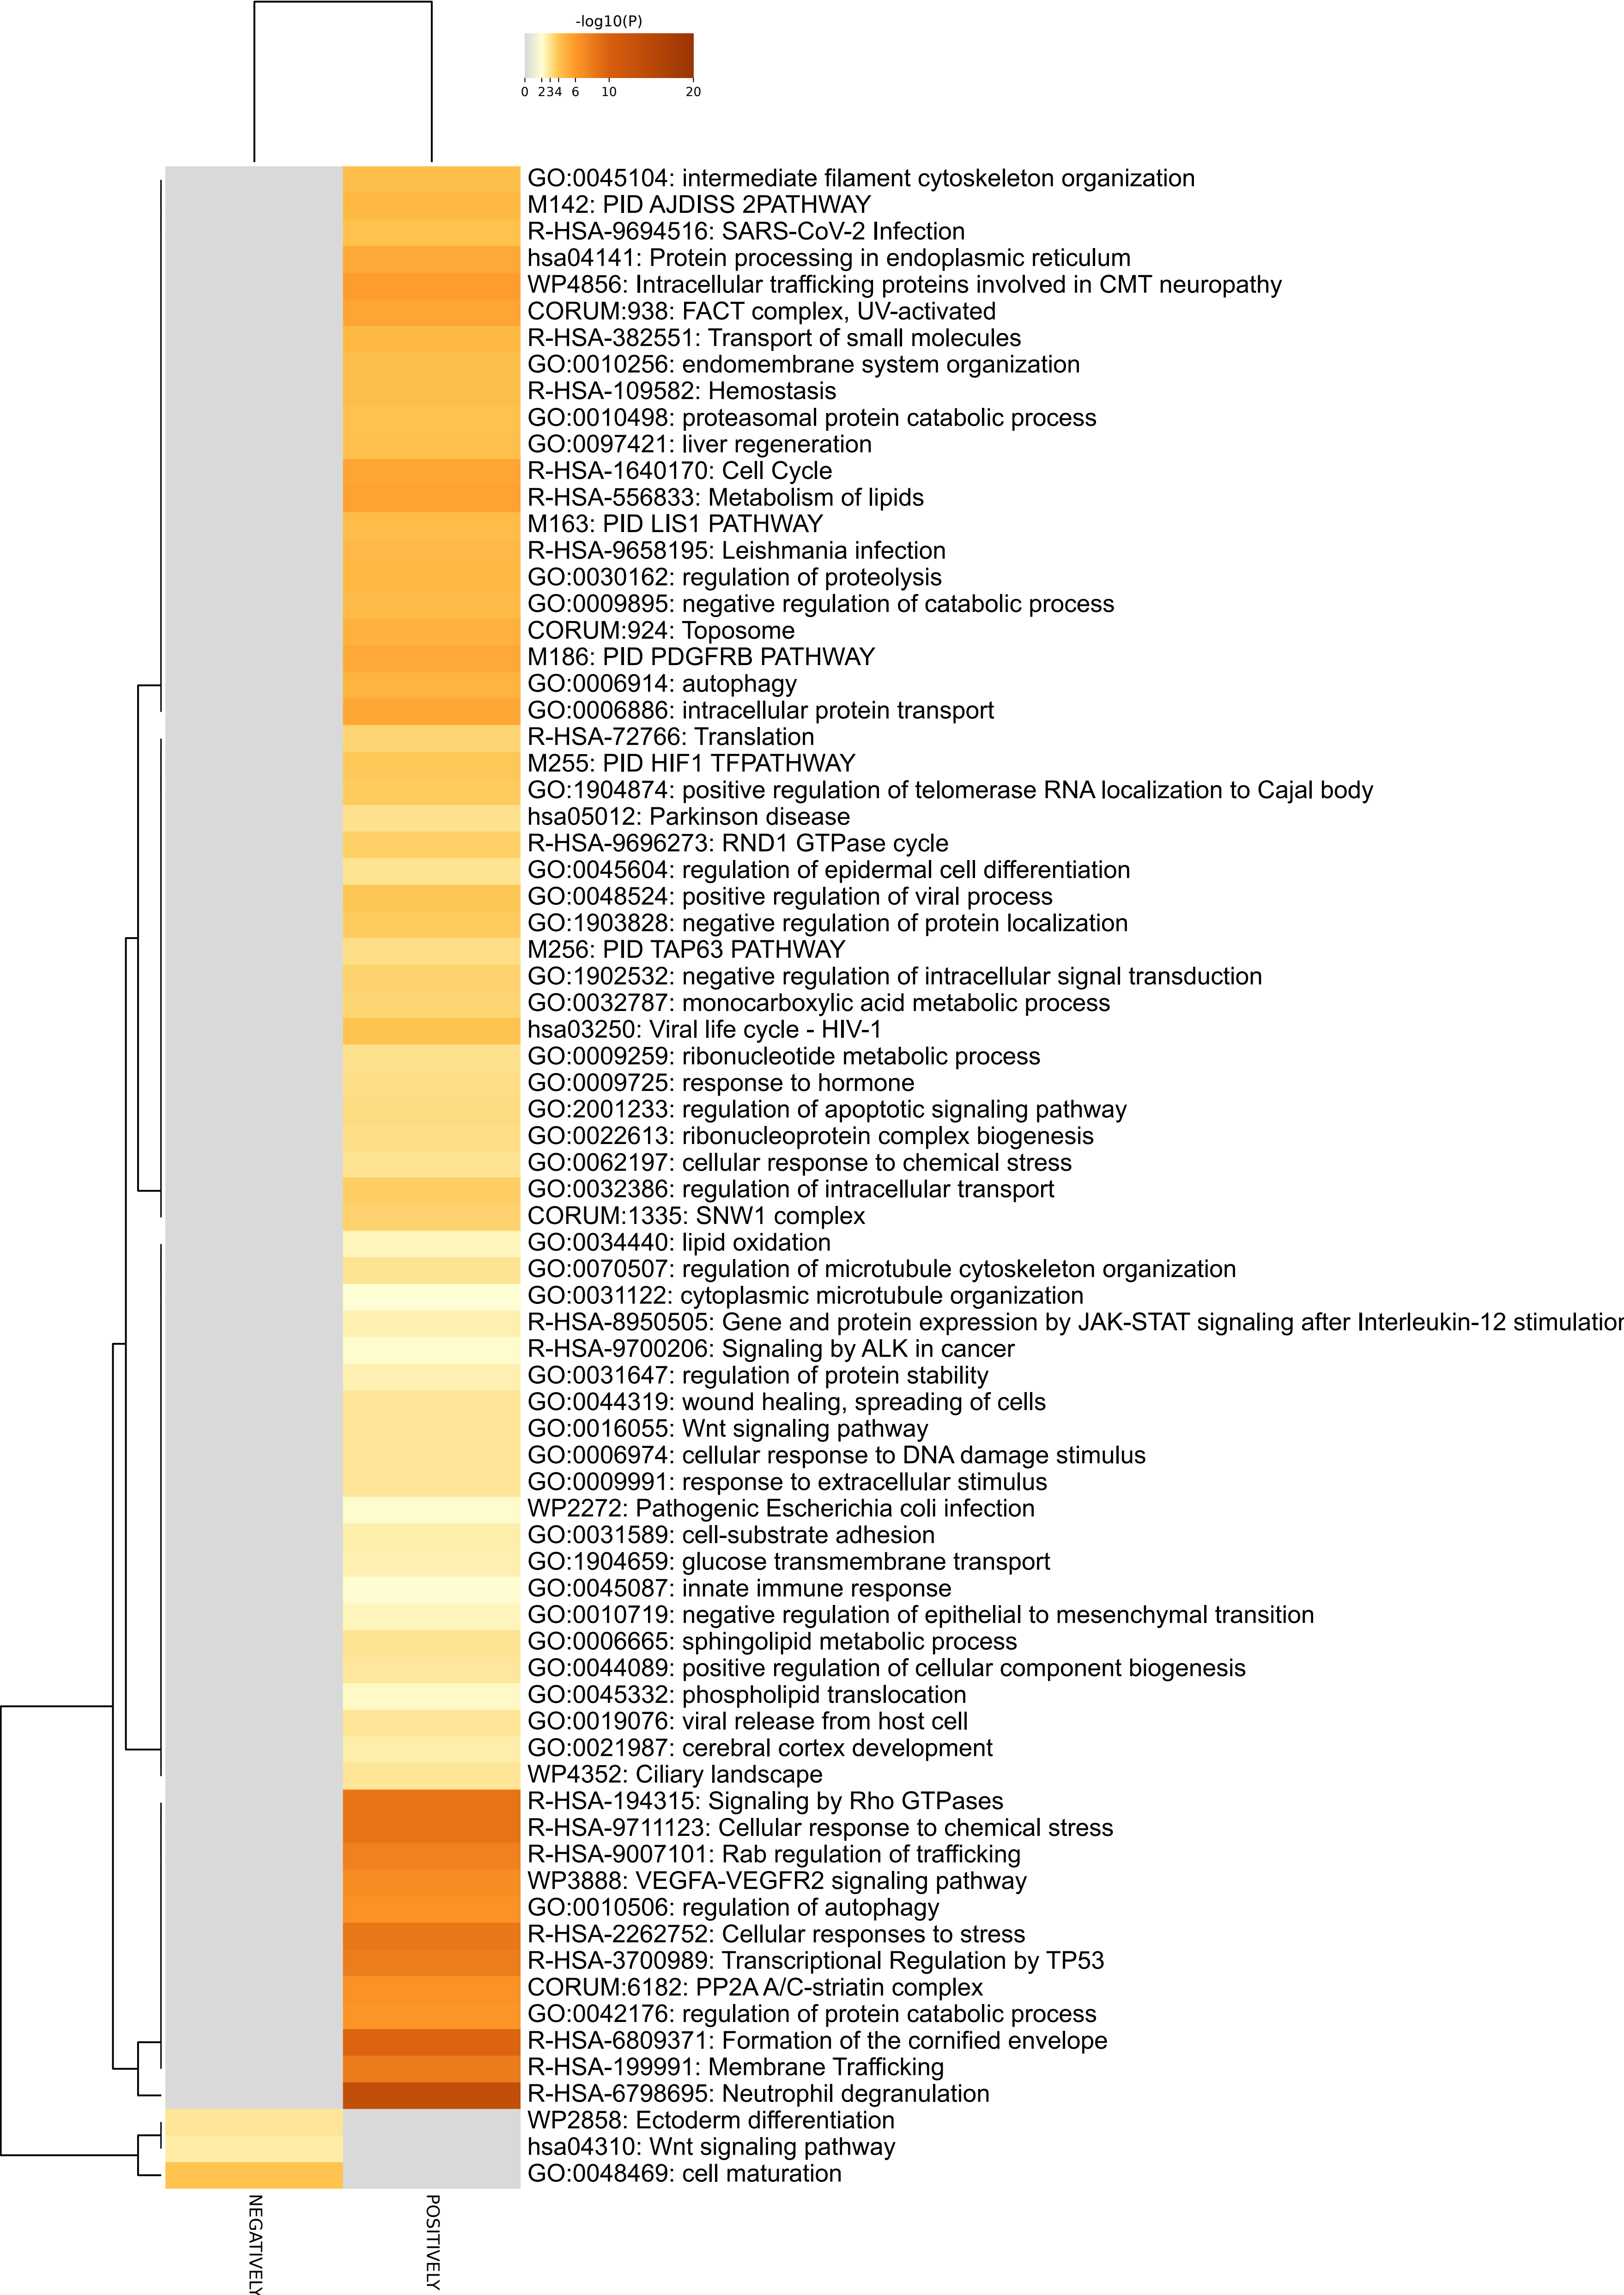

Supplement: s1 [file s1]

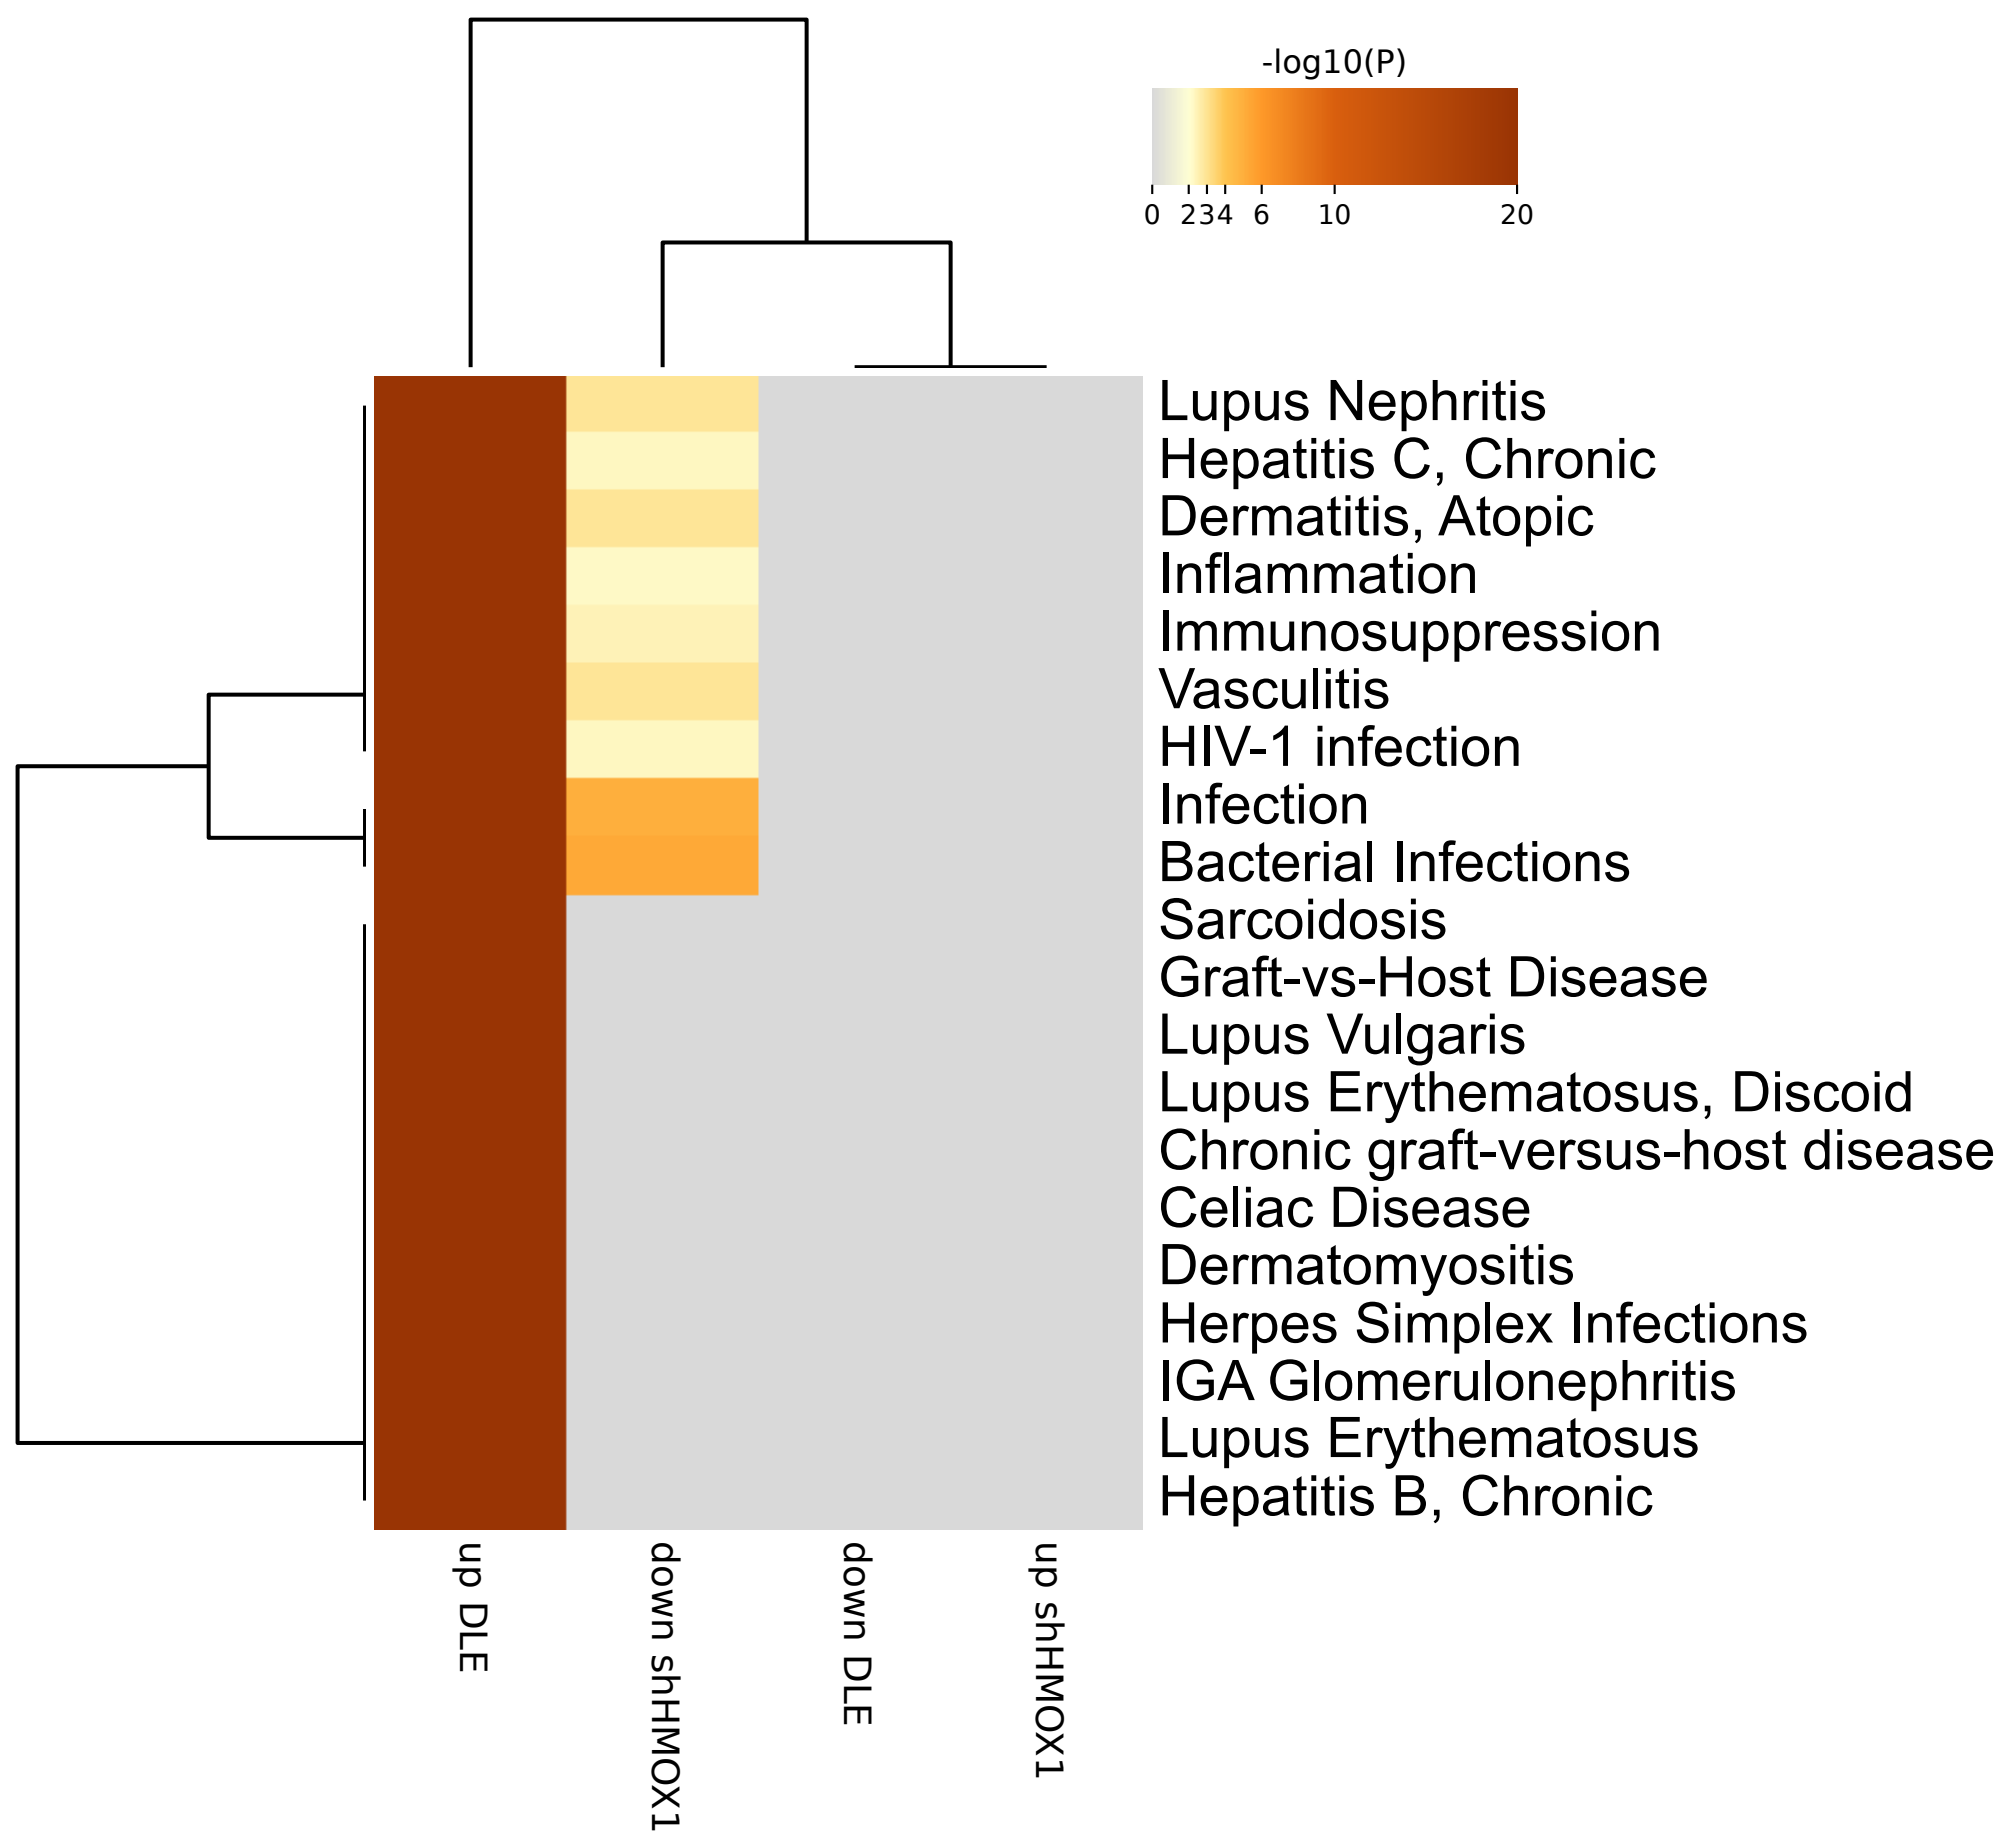

Supplement: s1 [file s1]

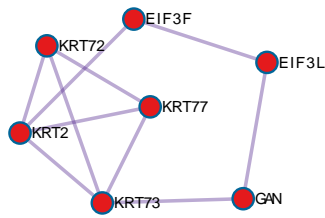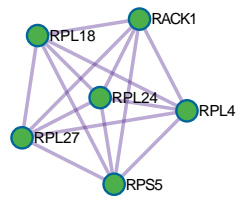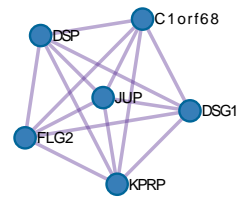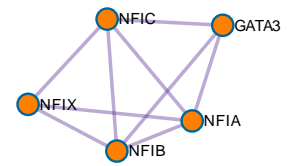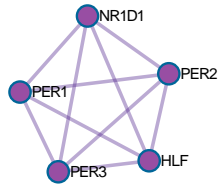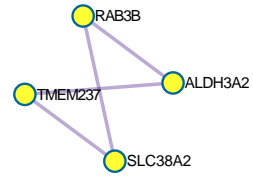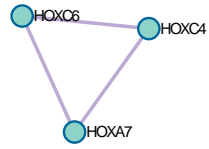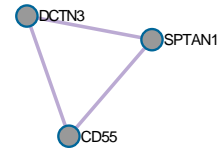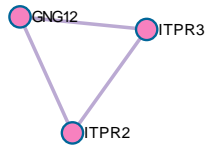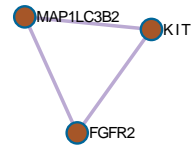

- MCODE1
- MCODE2
- MCODE3
- MCODE4
- MCODE5
- MCODE6
- MCODE7
- MCODE8
- MCODE9
- MCODE10

Supplement: s1 [file s1]

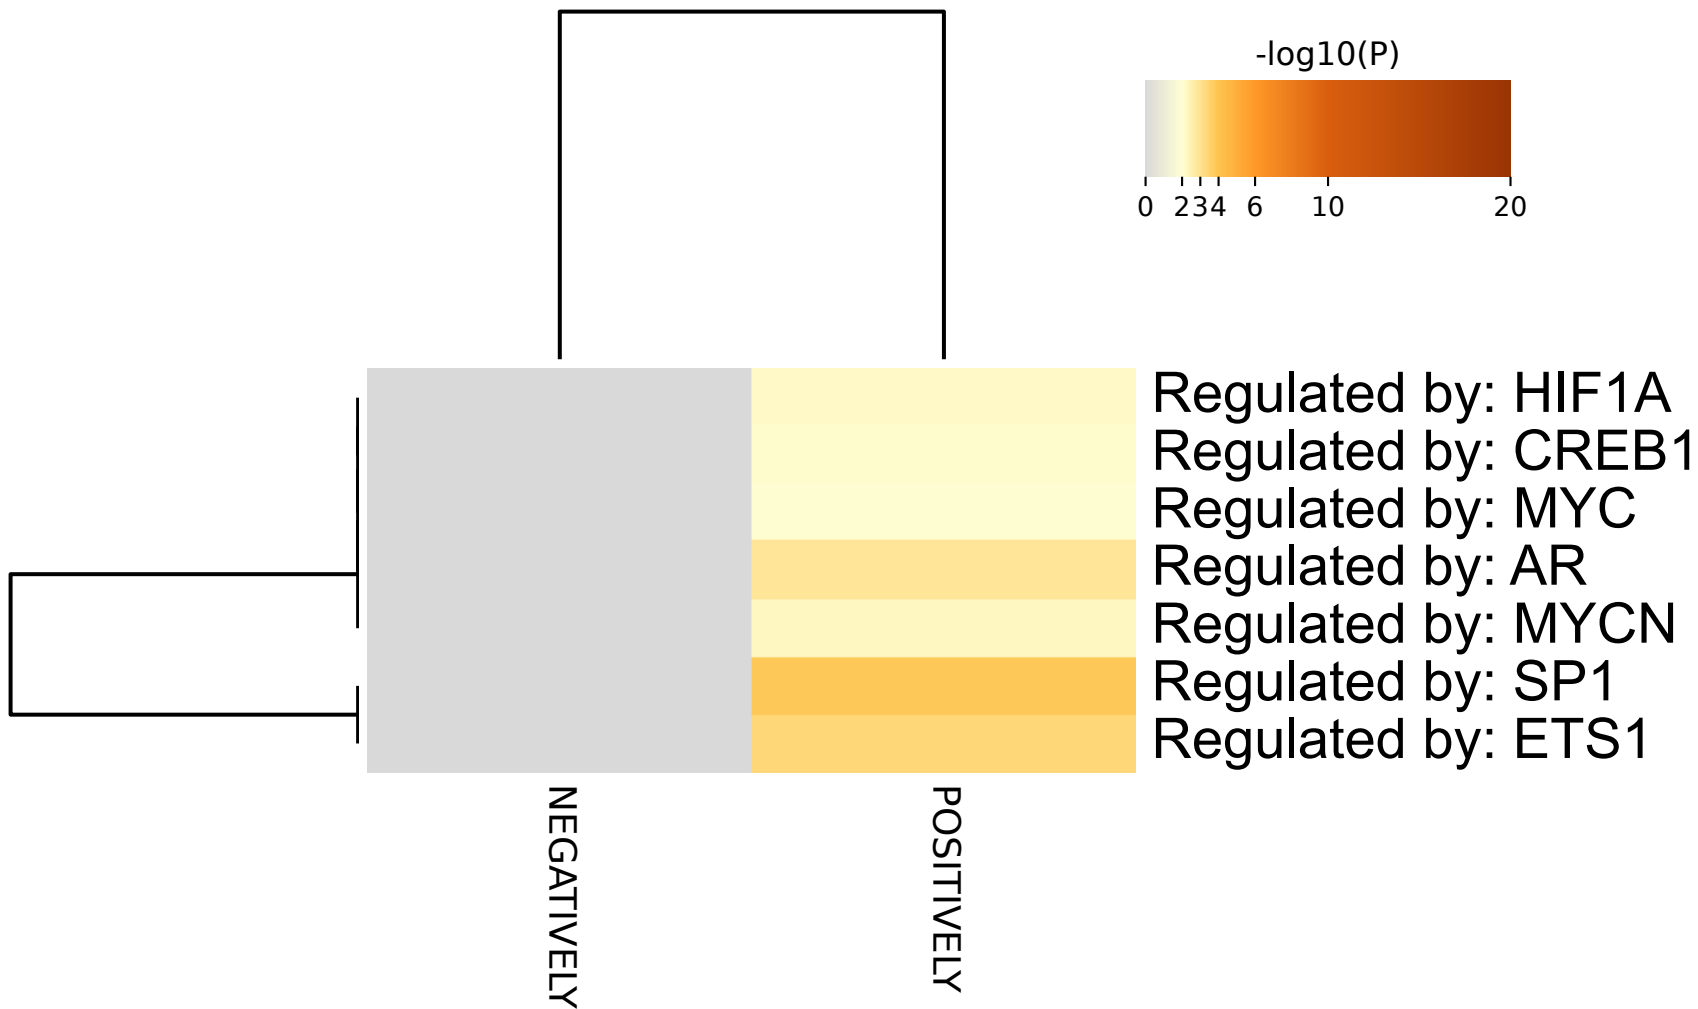

Supplement: s1 [file s1]

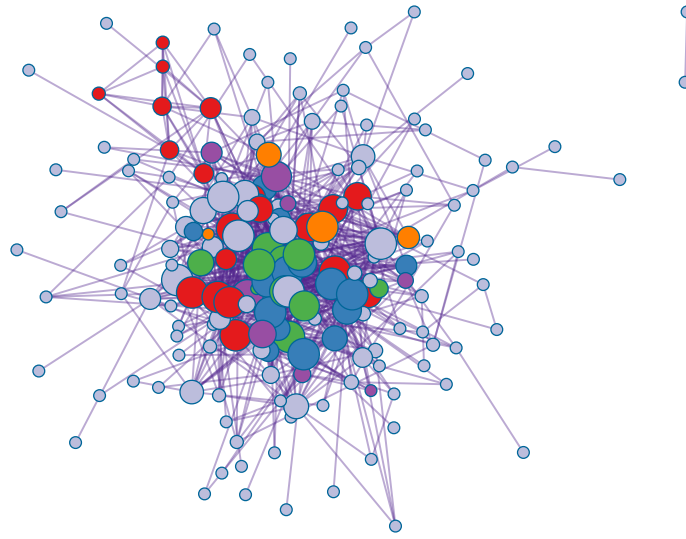

■ MCODE1  
■ MCODE2  
■ MCODE3  
■ MCODE4  
■ MCODE5

 created by  
<http://metascape.org>

Supplement: s1 [file s1]

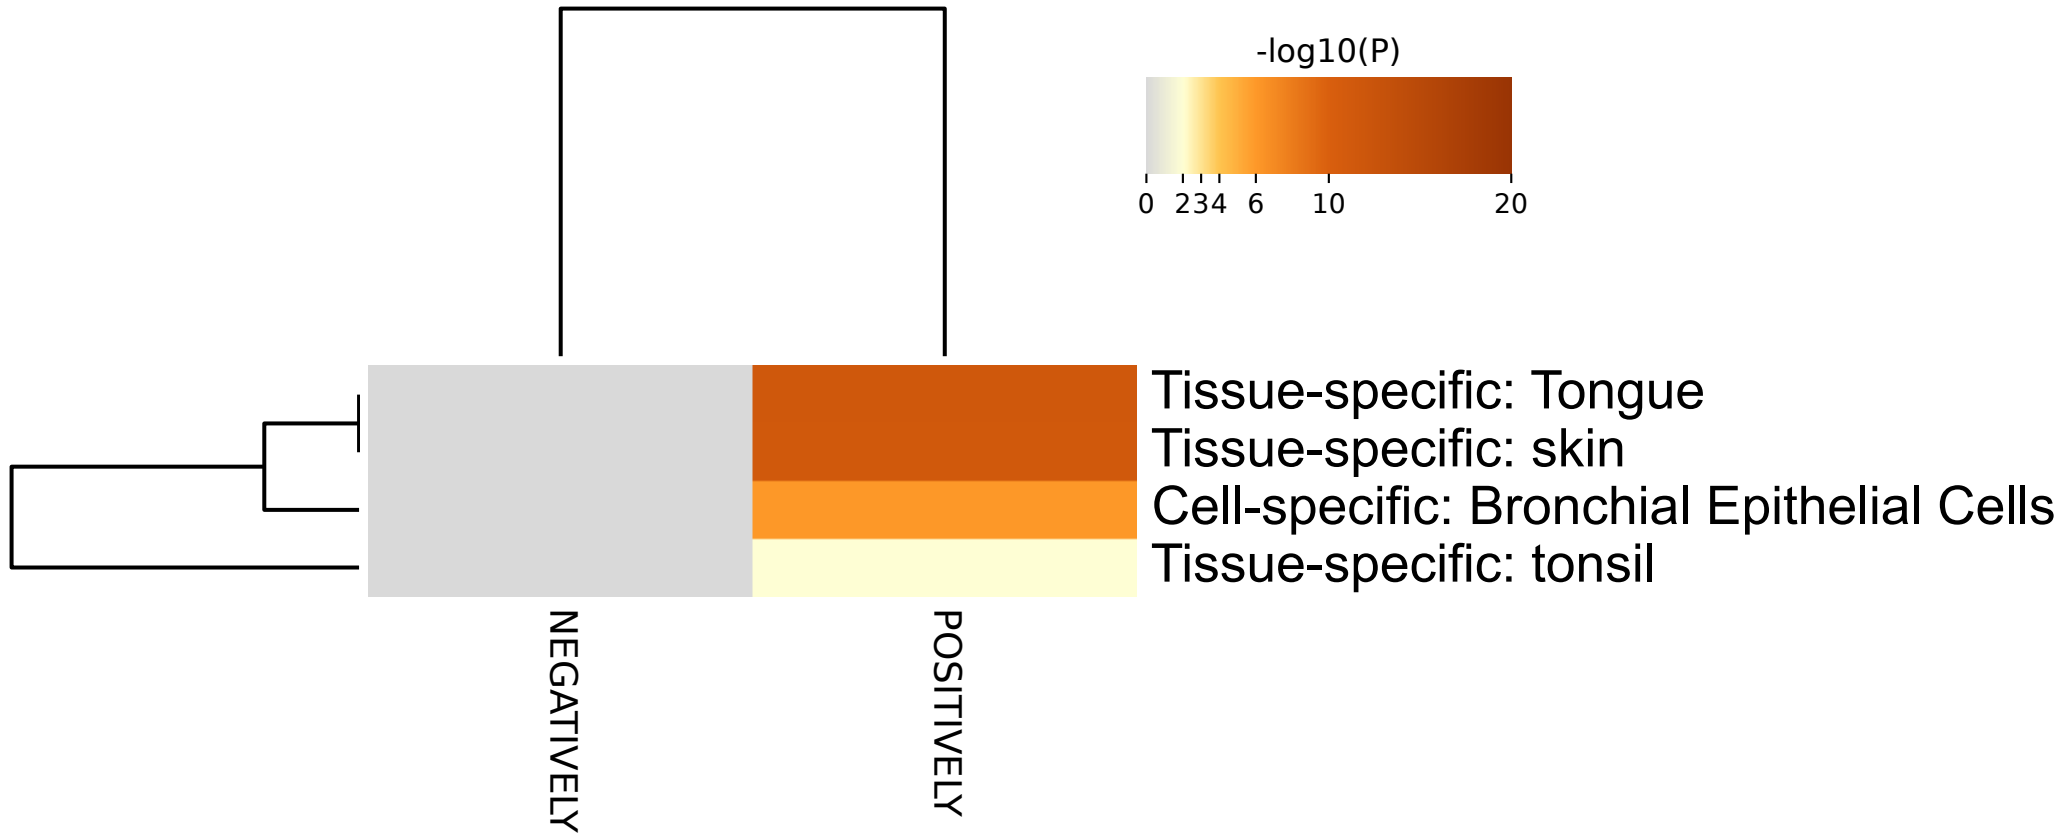

Supplement: s1 [file s1]

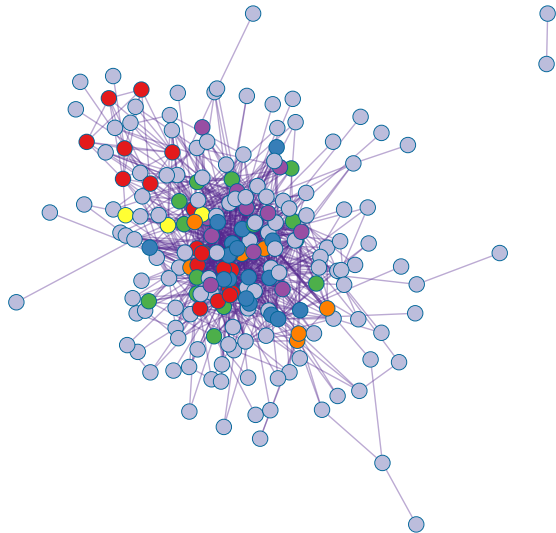

- MCODE1
- MCODE2
- MCODE3
- MCODE4
- MCODE5
- MCODE6

 created by  
<http://metascape.org>

Supplement: s1 [file s1]

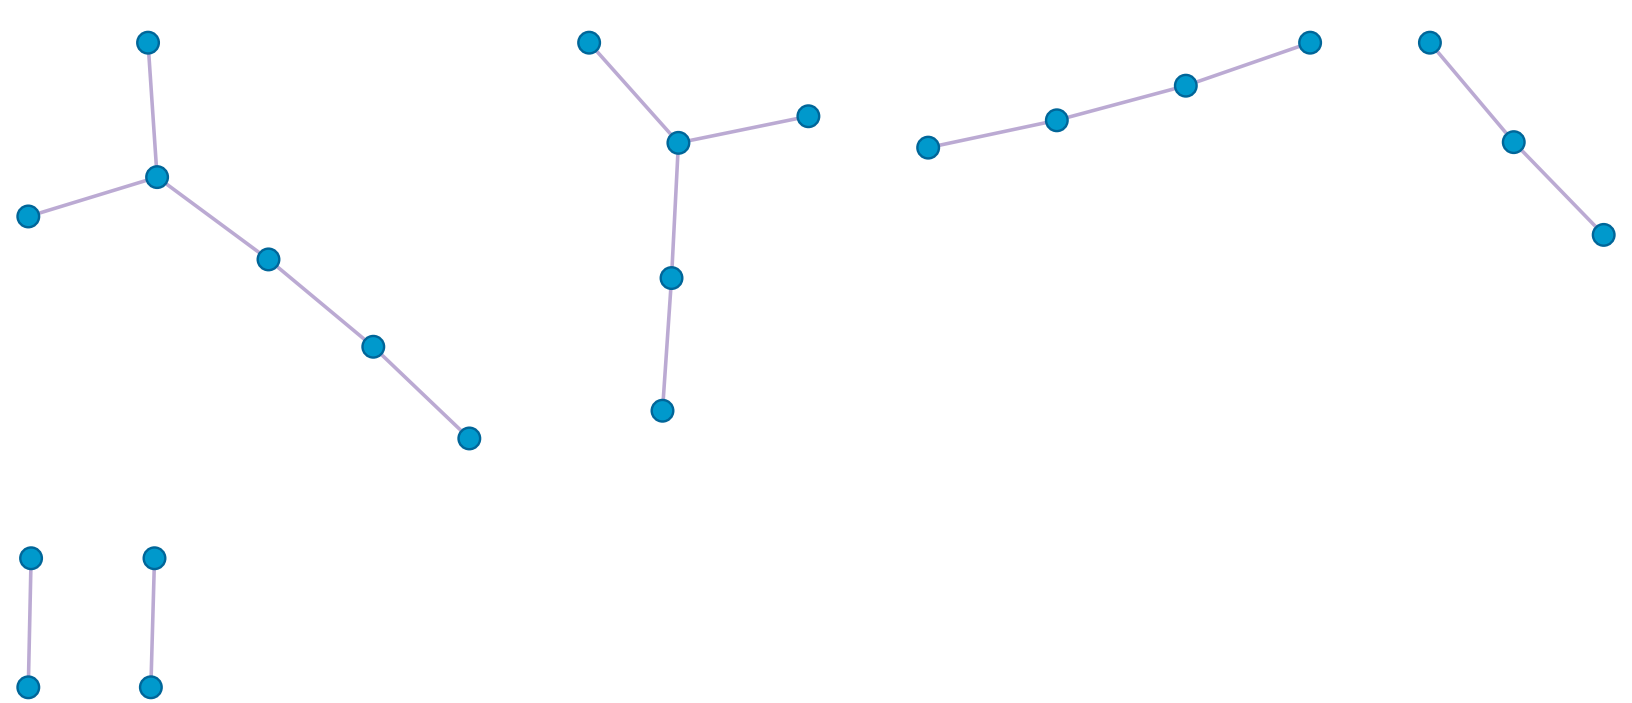

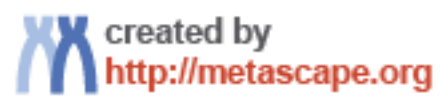

Supplement: s1 [file s1]

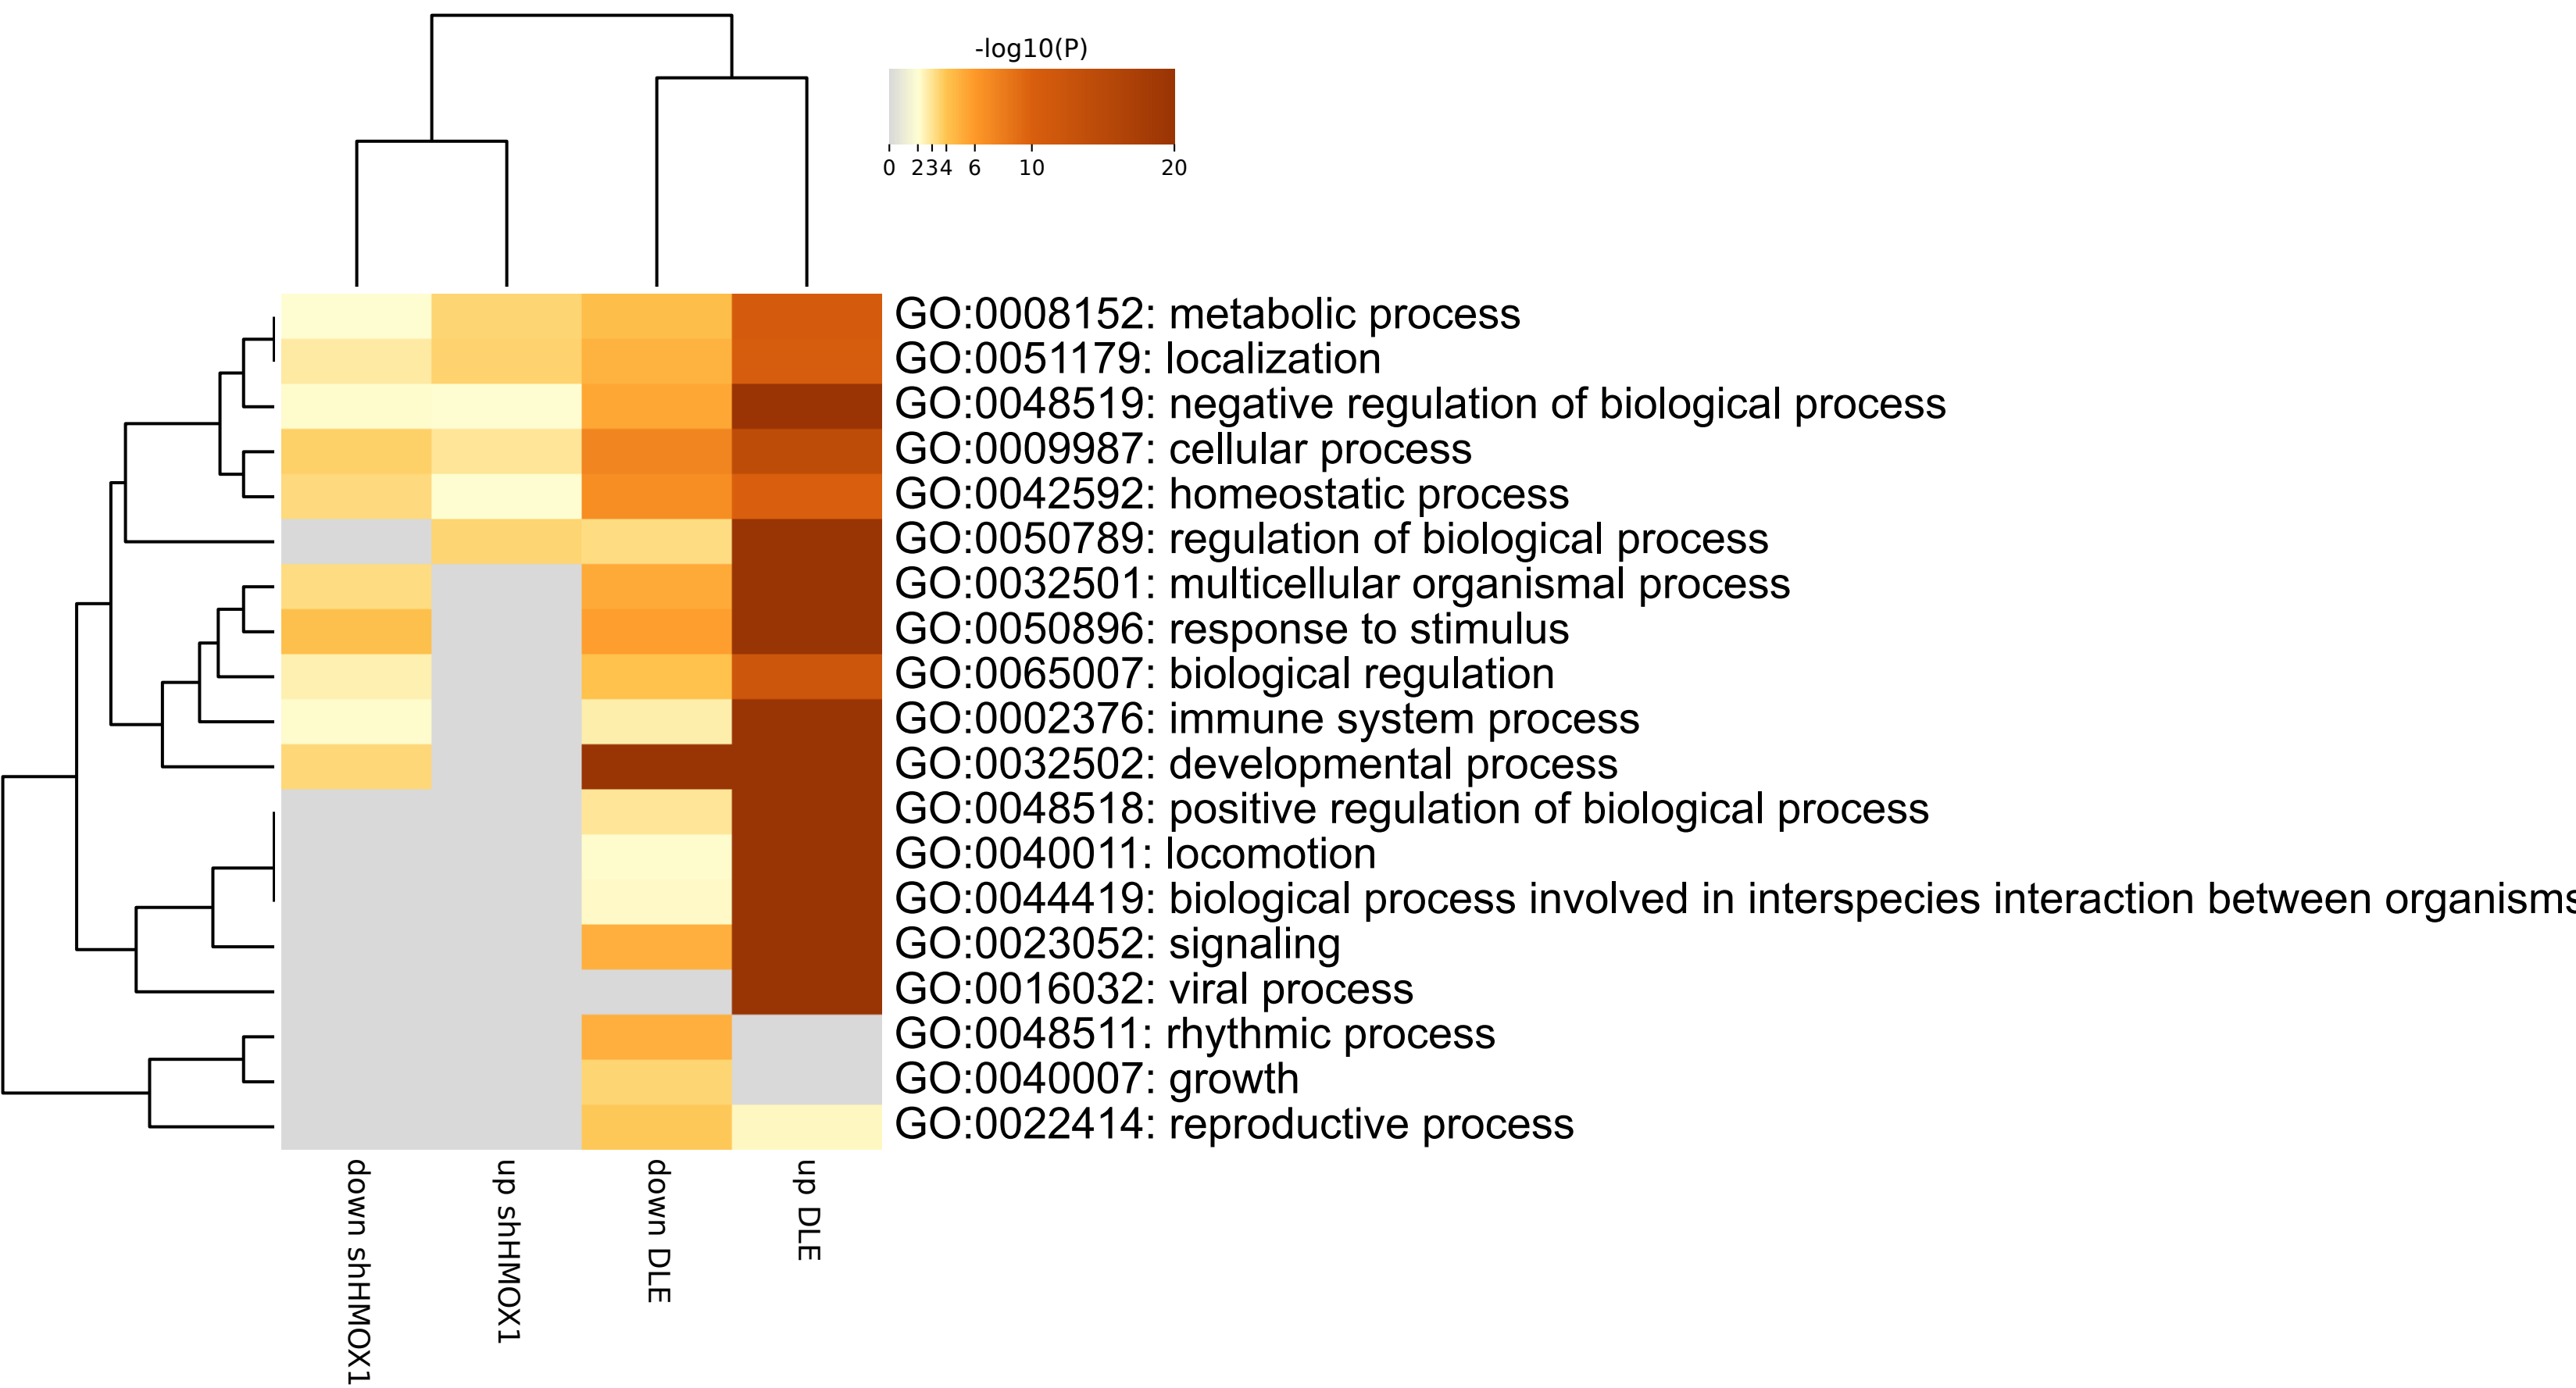

Supplement: s1 [file s1]

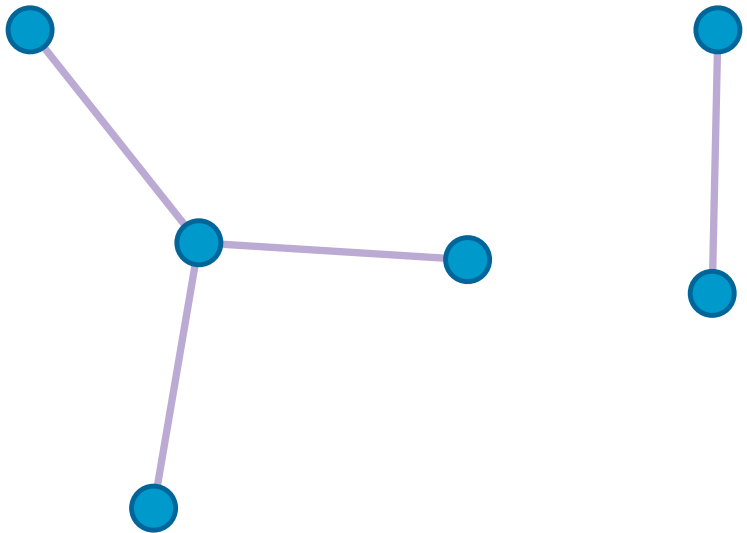

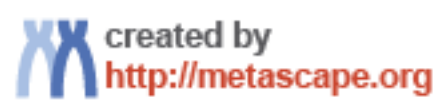

Supplement: s1 [file s1]

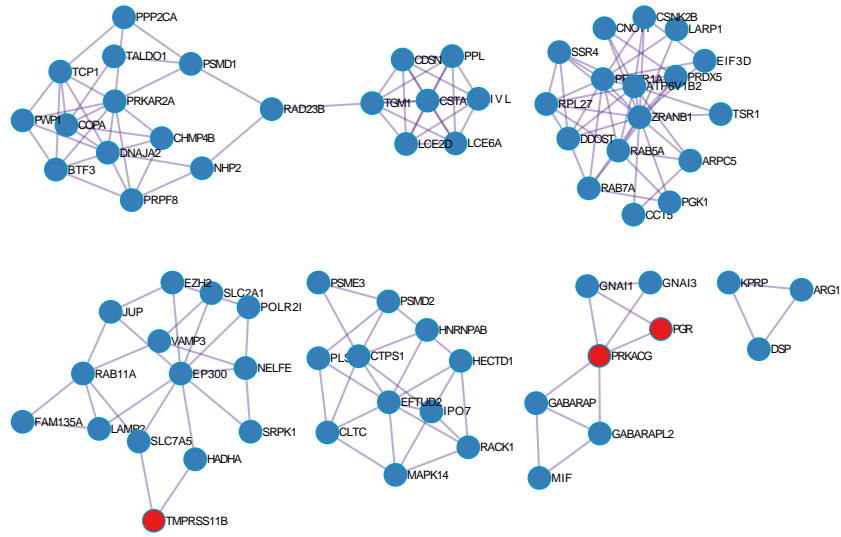

■ NEGATIVELY  
■ POSITIVELY  
 created by  
<http://metascape.org>

Supplement: s1 [file s1]

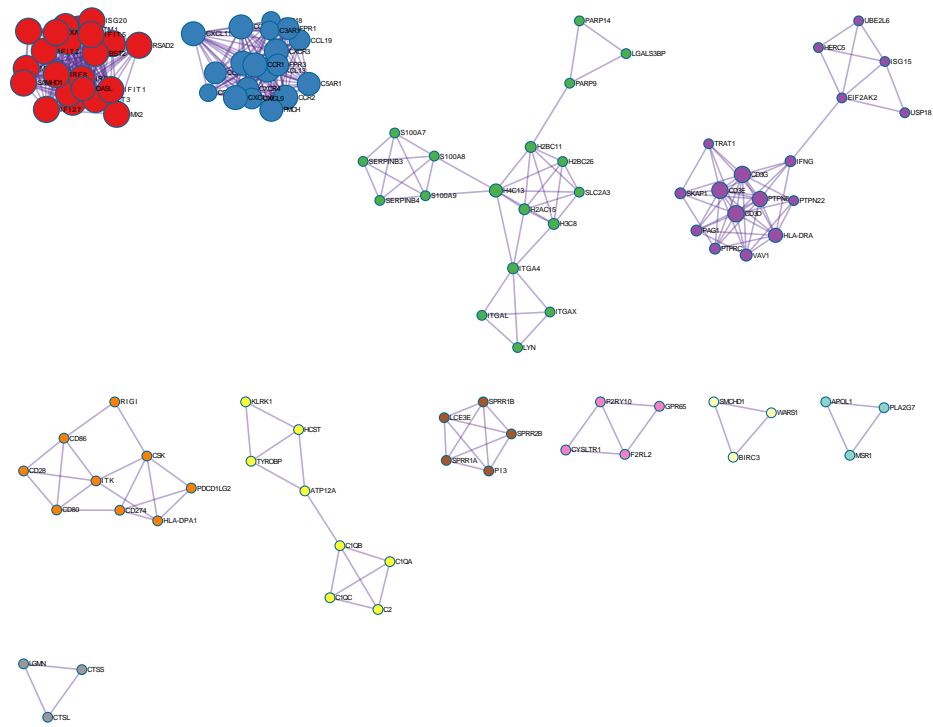

■ MCODE1  
■ MCODE2  
■ MCODE3  
■ MCODE4  
■ MCODE5  
■ MCODE6  
■ MCODE7  
■ MCODE8  
■ MCODE9  
■ MCODE10  
■ MCODE11

Supplement: s1 [file s1]

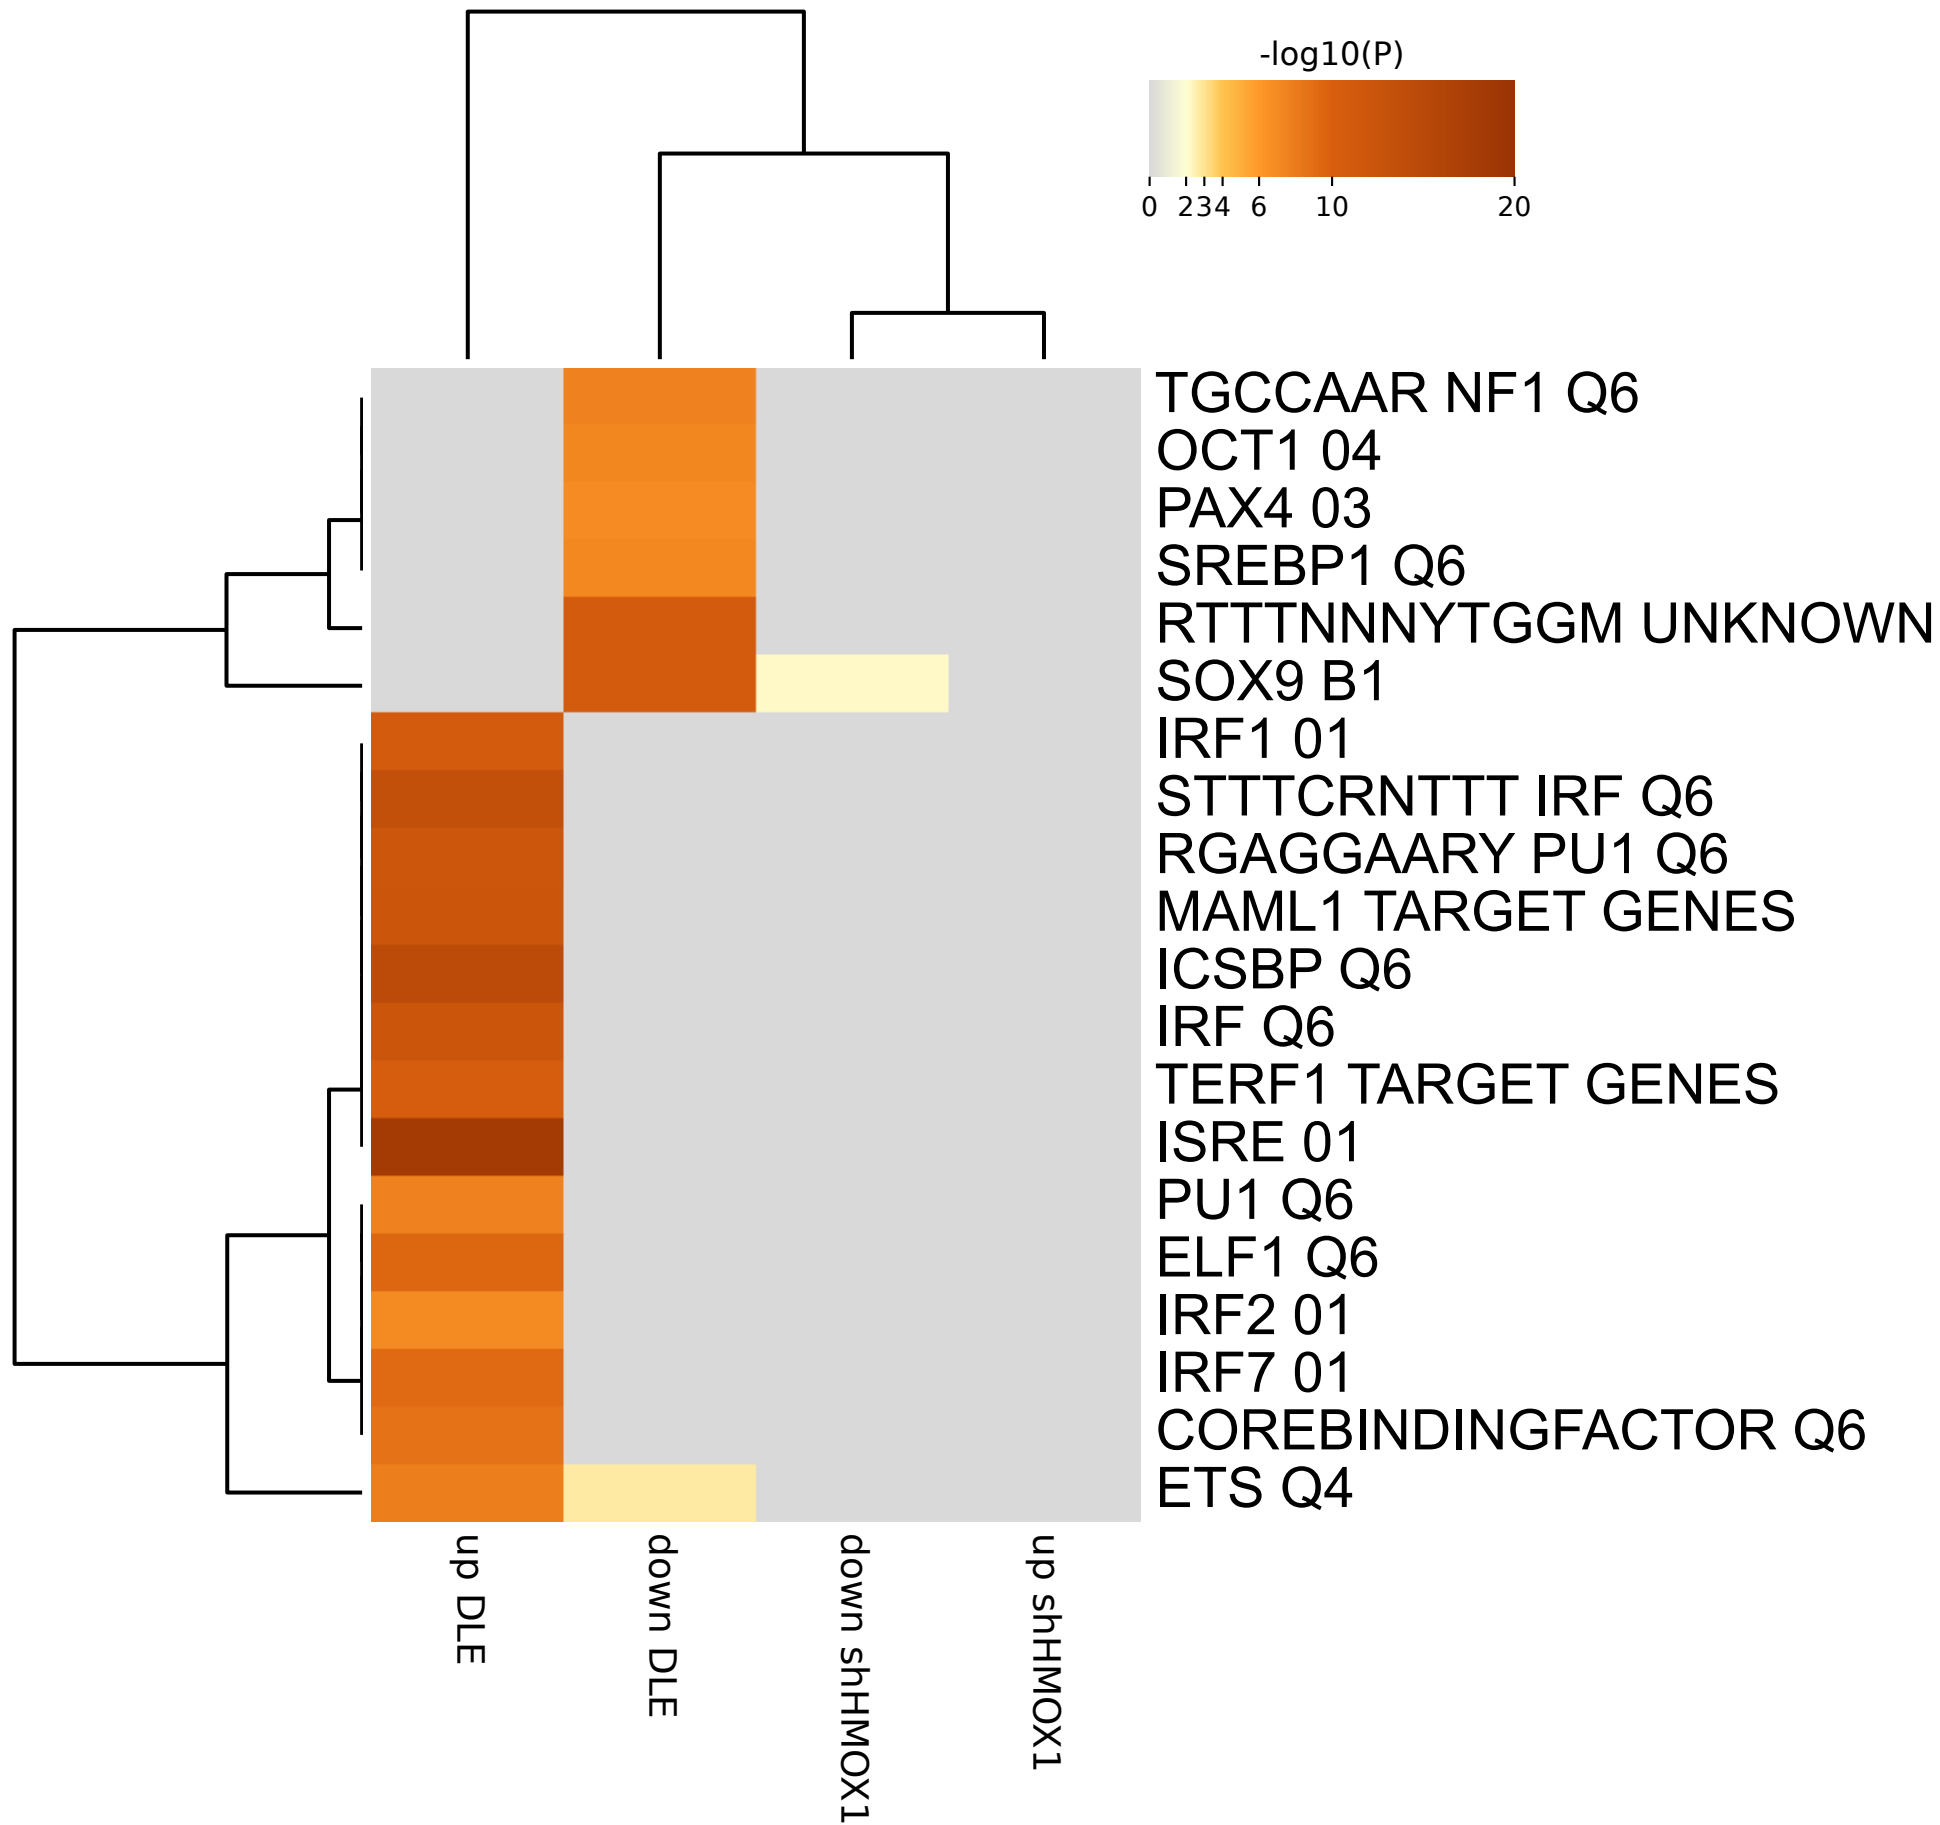

Supplement: s1 [file s1]

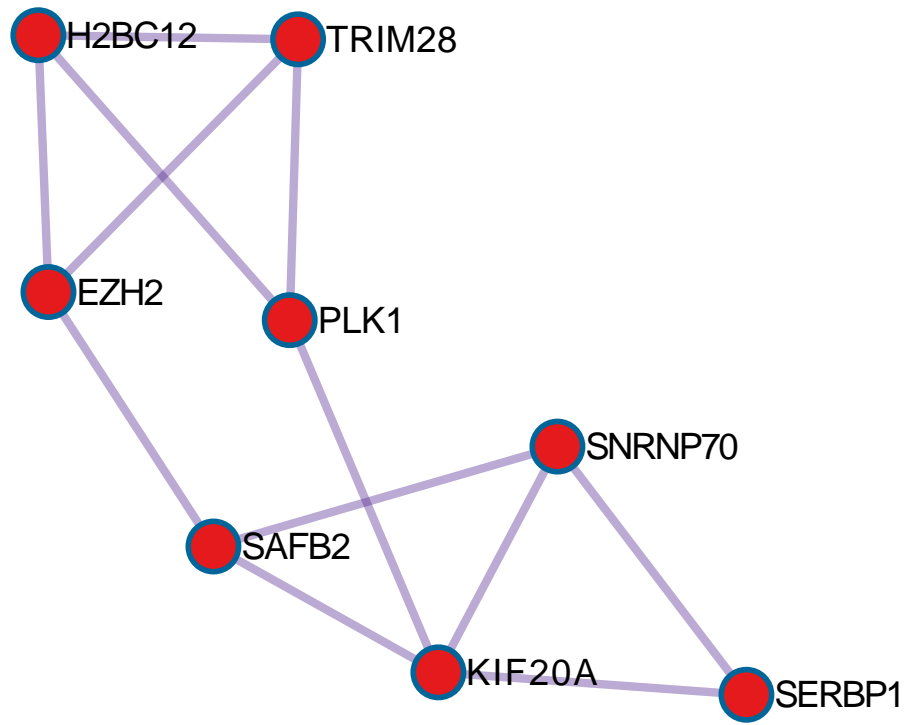

■ MCODE1

 created by  
<http://metascape.org>

Supplement: s1 [file s1]
